# Supplementary material for: Iron-catalyzed one-pot cyclization and amination of 2-alkynylthioanisoles using nitrosobenzenes as the amine source
Source: Royal Society of Chemistry journal article supplement (doi:10.1039/d2qo00535b), 2022-01-01
Supplement: d2qo00535b1.pdf [file d2qo00535b1.pdf]

## Supporting Information

### Iron-catalyzed one-pot cyclization and amination of 2-alkynylthioanisoles using nitrosobenzenes as amine source

Yi Ren,<sup>a</sup> Zhenyu An,<sup>b</sup> Pengbo Zhao,<sup>a</sup> Mengxing Li,<sup>a</sup> and Rulong Yan<sup>\*a</sup>

<sup>a</sup> State Key Laboratory of Applied Organic Chemistry, Key laboratory of Nonferrous Metal Chemistry and Resources Utilization of Gansu Province, College of Chemistry and Chemical Engineering, Lanzhou University, Lanzhou, Gansu, China.

E-mail: [yanrl@lzu.edu.cn](mailto:yanrl@lzu.edu.cn)

<sup>b</sup> College of Pharmacy, Ningxia Medical University, Yinchuan, Ningxia, China

#### Table of Contents

|                                        |         |
|----------------------------------------|---------|
| General remark                         | S2      |
| Experimental procedures                | S2-S4   |
| The X-ray data                         | S5-S6   |
| Characterization Data for the Products | S7-S29  |
| Reference                              | S30     |
| Copies of NMR spectra                  | S31-S65 |

## General remark

$^1\text{H}$  NMR and  $^{13}\text{C}$  NMR spectra were recorded on Bruker 400M and Mercury 600M in  $\text{CDCl}_3$ . All chemical shifts are given as  $\delta$  value (ppm) with reference to tetramethylsilane (TMS) as an internal standard. All compounds were further characterized by HRMS; copies of  $^1\text{H}$  NMR and  $^{13}\text{C}$  NMR spectra were provided. Products were purified by flash chromatography on 200-300 mesh silica gels. All melting points were determined without correction. All reactions were carried out under argon atmosphere in oven-dried glassware, unless otherwise noted. All reagents were purchased commercially and used as received, unless otherwise noted.

## Experimental section

### General Procedure for the Synthesis of S-1 <sup>[1]</sup>

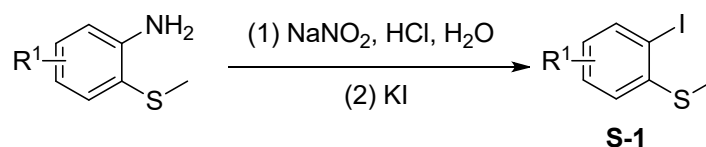

A mixture of 2-(methylthio)aniline (149 mg, 1.5 mmol), aqueous HCl (37%, 0.3 mL) and water (1.3 mL) was cooled to 0 °C. A solution of NaNO<sub>2</sub> (113 mg, 1.6 mmol) in water (0.3 mL) was added dropwise and stirred for 10 min. The resulting diazonium salt was treated with a solution of KI (285 mg, 1.7 mmol) in water (0.3 mL). The resulting brown foamy mixture was stirred for 30 min at room temperature and heated at reflux for 15 min. After cooling to ambient temperature, the reaction was diluted with water (10 mL) and neutralized by slow addition of aqueous Na<sub>2</sub>S<sub>2</sub>O<sub>3</sub>. The mixture was extracted with dichloromethane (10 mL × 2). The combined organic layer was dried over NaSO<sub>4</sub>, filtered and evaporated in vacuo. The residue was purified by silica gel column chromatography to afford (2-iodophenyl)(methyl)sulfane as colorless oil (260 mg, 81%).

### General Procedure for the Synthesis of 1a-1r, 1t-1u <sup>[2]</sup>

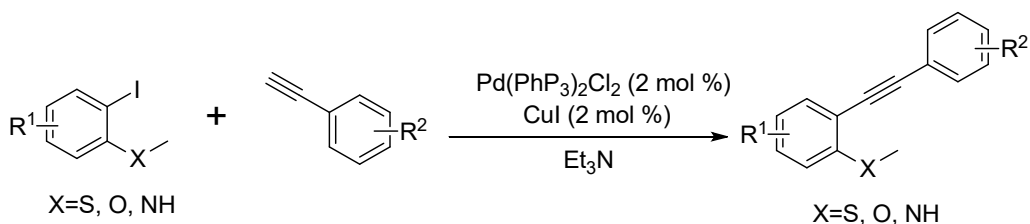

To a solution of (2-iodophenyl)(methyl)sulfane (5 mmol), CuI (2 mol%), and Pd(PPh<sub>3</sub>)<sub>2</sub>Cl<sub>2</sub> (2 mol %) in Et<sub>3</sub>N (100 mL) was added drop-wise an alkyne (6 mmol) under N<sub>2</sub>. The reaction mixture was stirred for 5-10 h at room temperature. Upon completion, the mixture was diluted with diethyl ether and then washed with water and brine successively. The organic phase was dried with anhydrous Na<sub>2</sub>SO<sub>4</sub>, filtered, and concentrated under vacuum. The residue was purified through silica gel flash chromatography to give the desired product in mostly > 90% yield.

### General Procedure for the Synthesis of **1s** [2][3]

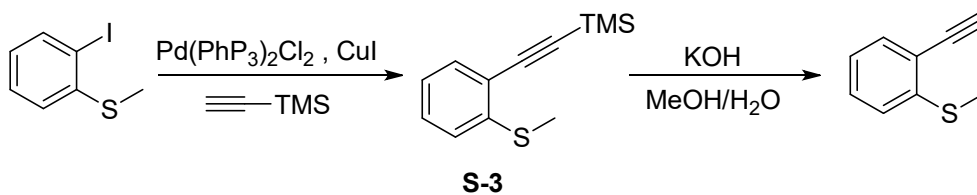

**S-3** was synthesized using a literature procedure in 98% yield.

A solution of KOH (0.45 g, 8.0 mmol, 2 equiv) in 2 mL of water was added dropwise to *o*-(trimethylsilylethynyl)thioanisole (0.88 g, 4.0 mmol) in 20 mL of CH<sub>3</sub>OH under an argon atmosphere at 25 °C. The mixture was stirred for another 0.5 h at 25 °C, and the CH<sub>3</sub>OH was removed under vacuum. The residue was added to 20 mL of brine, and the mixture was extracted with EtOAc (3 × 20 mL), dried (Na<sub>2</sub>SO<sub>4</sub>), filtered, and the solvent removed under vacuum. Purification by flash chromatography afforded the **1s** (yield = 86%) as a yellow oil.

### Preparation of Substituted Phenyl Nitroso [4]

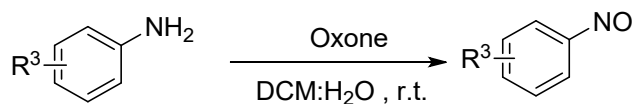

A solution of Oxone (2-4 equiv) in (8-154 mL) water was added to a solution of

aniline derivatives (1 equiv) in dichloromethane with vigorous stirring. The reaction mixture was stirred at room temperature under argon atmosphere for 30 min to 24 h. After disappearance of starting materials (indicated by TLC), the reaction was quenched by addition of saturated sodium bicarbonate solution (30-60 mL). The mixture was extracted with dichloromethane ( $3 \times 20$  mL). The combined organic layers were washed with 1M HCl (20-40 mL) then with brine solution (30-60 mL), dried over  $\text{Na}_2\text{SO}_4$  and concentrated under reduced pressure. The crude product was subjected to column chromatography (silica gel) to afford the analytically pure products.

### General Procedure for the Synthesis of *N*,2-Diphenylbenzo[*b*]thiophen-3-amine

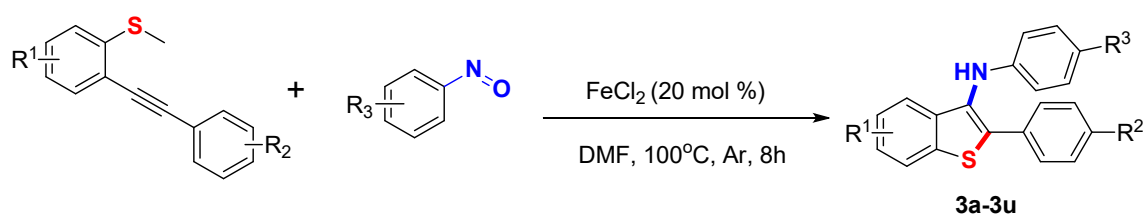

To a flame dried transparent Schlenk tube equipped with a stirring bar was added methyl(2-(phenylethynyl)phenyl)sulfane (0.3 mmol), DMF (2 mL),  $\text{FeCl}_2$  (20 mol %), nitrosobenzene (0.45 mmol, 1.5 equiv). The reaction mixture was stirred under argon atmosphere at  $100^\circ\text{C}$  for 8h. Upon completion, the reaction mixture was concentrated under vacuum. The residue was purified by silicagel column chromatography using a petroleum ether to afford the corresponding products.

## The X-ray data of **3o** (CCDC 2117253)

Crystal **3o** growth with the volatilization method: an amount of 24 mg **3o** was dissolved in dichloromethane on the brown small reagent bottle (5 mL), which acted as good solvent, and a layer of petroleum ether was injected on the surface of dichloromethane, and the cap is covered with a thin film, transparent crystals will be presented after seven days.

Crystals of C<sub>20</sub>H<sub>14</sub>FNS (**3o**) was determined. A suitable crystal was selected and determined on a ROD, Synergy Custom system, HyPix diffractometer. The crystal was kept at 149.99(10) K during data collection. Using Olex2 [5], the structure was solved with the ShelXT [6] structure solution program using Intrinsic Phasing and refined with the ShelXL [7] refinement package using Least Squares minimisation.

All hydrogen atoms were placed by geometrical considerations and were added to the structure factor calculations. The crystal structure (excluding structure factor) has been deposited to Cambridge Crystallographic Data Centre and allocated deposition number: 2117253.

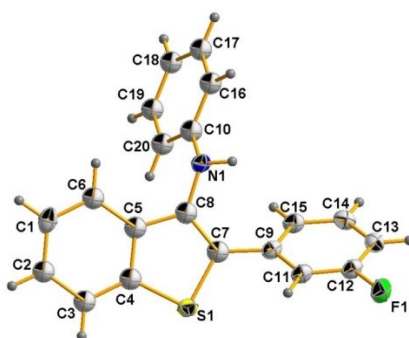

**Figure S1** X-ray crystal structure of compound **3o**

**Table S1** Crystal data and structure refinement for **3o**.

|                     |                                                                              |
|---------------------|------------------------------------------------------------------------------|
| Identification code | <b>3o</b>                                                                    |
| Empirical formula   | C <sub>40</sub> H <sub>28</sub> F <sub>2</sub> N <sub>2</sub> S <sub>2</sub> |
| Formula weight      | 638.76                                                                       |
| Temperature/K       | 149.99(10)                                                                   |

|                                             |                                                                |
|---------------------------------------------|----------------------------------------------------------------|
| Crystal system                              | triclinic                                                      |
| Space group                                 | P-1                                                            |
| a/Å                                         | 9.4119(3)                                                      |
| b/Å                                         | 9.9546(3)                                                      |
| c/Å                                         | 16.8497(5)                                                     |
| $\alpha$ /°                                 | 78.350(2)                                                      |
| $\beta$ /°                                  | 89.392(2)                                                      |
| $\gamma$ /°                                 | 82.699(2)                                                      |
| Volume/Å <sup>3</sup>                       | 1533.44(8)                                                     |
| Z                                           | 2                                                              |
| $\rho_{\text{calc}}$ /cm <sup>3</sup>       | 1.383                                                          |
| $\mu$ /mm <sup>-1</sup>                     | 1.943                                                          |
| F(000)                                      | 664.0                                                          |
| Crystal size/mm <sup>3</sup>                | 0.1 × 0.07 × 0.05                                              |
| Radiation                                   | Cu K $\alpha$ ( $\lambda$ = 1.54184)                           |
| 2 $\Theta$ range for data collection/°      | 5.356 to 154.736                                               |
| Index ranges                                | -11 ≤ h ≤ 10, -12 ≤ k ≤ 12, -15 ≤ l ≤ 21                       |
| Reflections collected                       | 18124                                                          |
| Independent reflections                     | 6162 [ $R_{\text{int}}$ = 0.0552, $R_{\text{sigma}}$ = 0.0590] |
| Data/restraints/parameters                  | 6162/0/415                                                     |
| Goodness-of-fit on F <sup>2</sup>           | 1.048                                                          |
| Final R indexes [ $I \geq 2 \sigma(I)$ ]    | $R_1$ = 0.0480, $wR_2$ = 0.1303                                |
| Final R indexes [all data]                  | $R_1$ = 0.0537, $wR_2$ = 0.1344                                |
| Largest diff. peak/hole / e Å <sup>-3</sup> | 0.51/-0.44                                                     |

## Characterization Data for the Products

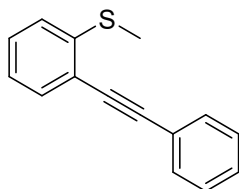

### **methyl(2-(phenylethynyl)phenyl)sulfane (1a)** <sup>[8]</sup>

Yellow oil (0.84 g, 75% yield). <sup>1</sup>H NMR (400 MHz, CDCl<sub>3</sub>, ppm): δ = 7.56-7.58 (m, 2 H), 7.48 (s, 1 H), 7.27-7.36 (m, 5 H), 7.0 (m, 1 H), 2.51 (s, 3 H); <sup>13</sup>C NMR (100 MHz, CDCl<sub>3</sub>, ppm): δ = 141.7, 132.2, 131.5, 128.7, 128.3, 128.2, 124.2, 124.1, 123.1, 121.3, 95.8, 86.9, 15.0.

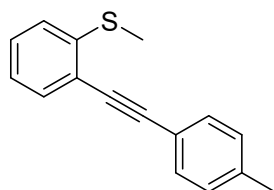

### **methyl(2-(*p*-tolylethynyl)phenyl)sulfane (1b)** <sup>[8]</sup>

Yellow solid (0.96 g, 81% yield). <sup>1</sup>H NMR (400 MHz, CDCl<sub>3</sub>, ppm): δ = 7.49 (d, *J* = 8 Hz, 3 H), 7.31-7.27 (m, 1 H), 7.17 (d, *J* = 8 Hz, 3 H), 7.13-7.09 (m, 1 H), 2.51 (s, 3 H), 2.37 (s, 3 H); <sup>13</sup>C NMR (100 MHz, CDCl<sub>3</sub>, ppm): δ = 141.5, 138.5, 132.1, 131.5, 129.1, 128.6, 124.2, 124.0, 121.5, 120.1, 96.1, 86.2, 21.5, 15.1.

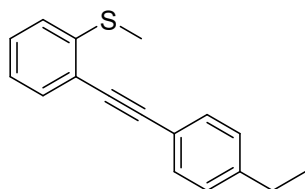

### **(2-((4-ethylphenyl)ethynyl)phenyl)(methyl)sulfane (1c)** <sup>[8]</sup>

Yellow oil (1.059 g, 83% yield). <sup>1</sup>H NMR (400 MHz, CDCl<sub>3</sub>, ppm): δ = 7.50-7.45 (m, 3 H), 7.28-7.24 (m, 1 H), 7.17-7.13 (m, 3 H), 7.10-7.06 (m, 1 H), 2.67-2.61 (m, 2 H), 2.47 (s, 3 H), 1.24-1.20 (m, 3 H); <sup>13</sup>C NMR (100 MHz, CDCl<sub>3</sub>, ppm): δ = 144.8,

141.5, 132.0, 131.5, 128.5, 127.8, 124.1, 123.9, 121.4, 120.3, 96.1, 86.2, 28.8, 15.3, 15.0.

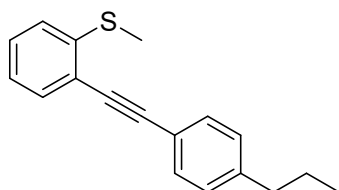

**methyl(2-((4-propylphenyl)ethynyl)phenyl)sulfane (1d)** <sup>181</sup>

Yellow solid (1.13 g, 85% yield). <sup>1</sup>H NMR (400 MHz, CDCl<sub>3</sub>, ppm): δ = 7.49-7.45 (m, 3 H), 7.29-7.24 (m, 1 H), 7.15 (d, *J* = 8 Hz, 3 H), 7.10-7.06 (m, 1 H), 2.60-2.56 (m, 2 H), 2.48 (s, 3 H), 1.68-1.58 (m, 2 H), 0.95-0.91 (m, 3 H); <sup>13</sup>C NMR (100 MHz, CDCl<sub>3</sub>, ppm): δ = 143.3, 141.5, 132.1, 131.4, 128.5, 128.5, 124.2, 124.0, 121.5, 120.3, 96.1, 86.2, 37.9, 24.3, 15.0, 13.7.

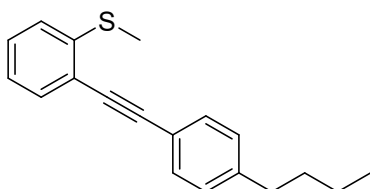

**(2-((4-butylphenyl)ethynyl)phenyl)(methyl)sulfane (1e)** <sup>181</sup>

yellow oil (0.98 g, 70% yield). <sup>1</sup>H NMR (600 MHz, CDCl<sub>3</sub>, ppm): δ = 7.50-7.46 (m, 3 H), 7.29-7.26 (m, 1 H), 7.17-7.15 (m, 3 H), 7.11-7.08 (m, 1 H), 2.63-2.60 (m, *J* = 8.4 Hz, 2 H), 2.49 (s, 3 H), 1.62-1.57 (m, 2 H), 1.37-1.33 (m, 2 H), 0.94-0.92 (m, 3 H); <sup>13</sup>C NMR (150 MHz, CDCl<sub>3</sub>, ppm): δ = 143.7, 141.7, 132.2, 131.6, 128.7, 128.6, 124.3, 124.2, 121.7, 120.4, 96.3, 86.4, 35.8, 33.6, 22.4, 15.2, 14.0.

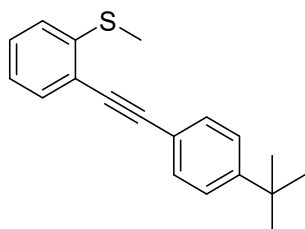

**(2-((4-*tert*-butylphenyl)ethynyl)phenyl)(methyl)sulfane (1f)** <sup>181</sup>

Yellow solid (1.01 g, 76% yield). <sup>1</sup>H NMR (400 MHz, CDCl<sub>3</sub>, ppm): δ = 7.54-7.46 (m, 3 H), 7.38-7.27 (m, 2 H), 7.25-7.23 (m, 1 H), 7.17-7.01 (m, 2 H), 2.49 (d, *J* = 2.8 Hz, 3 H), 1.32 (s, 9 H); <sup>13</sup>C NMR (100 MHz, CDCl<sub>3</sub>, ppm): δ = 143.7, 141.7, 132.2,



131.6, 128.7, 128.6, 124.3, 124.2, 121.7, 120.4, 96.2, 86.3, 35.7, 33.5, 22.4, 17.1, 15.2, 14.1.

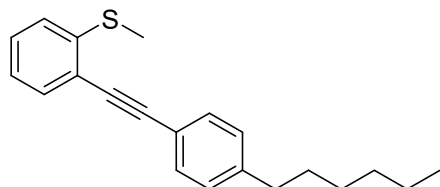

**(2-((4-hexylphenyl)ethynyl)phenyl)(methyl)sulfane (1g)** <sup>18</sup>

yellow oil (1.12 g, 76% yield). <sup>1</sup>H NMR (600 MHz, CDCl<sub>3</sub>, ppm): δ = 7.50-7.46 (m, 3 H), 7.27 (t, *J* = 7.8 Hz, 1 H), 7.15 (d, *J* = 7.8 Hz, 3 H), 7.09 (t, *J* = 7.8 Hz, 1 H), 2.60 (t, *J* = 8.4 Hz, 2 H), 2.49 (s, 3 H), 1.63-1.58 (m, 2 H), 1.35-1.29 (m, 4 H), 0.90-0.87 (m, 3 H); <sup>13</sup>C NMR (150 MHz, CDCl<sub>3</sub>, ppm): δ = 143.7, 141.7, 132.2, 131.6, 128.7, 128.6, 124.3, 124.2, 121.7, 120.4, 96.2, 86.4, 36.0, 31.5, 31.0, 22.6, 15.2, 14.2.

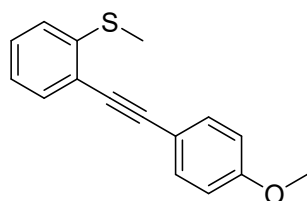

**(2-((4-methoxyphenyl)ethynyl)phenyl)(methyl)sulfane (1h)** <sup>18</sup>

Yellow solid (0.91 g, 72% yield). <sup>1</sup>H NMR (400 MHz, CDCl<sub>3</sub>, ppm): δ = 7.50 (d, *J* = 8.8 Hz, 2 H), 7.45 (d, *J* = 7.2 Hz, 1 H), 7.28-7.23 (m, 1 H), 7.14 (d, *J* = 8.0 Hz, 1 H), 7.10-7.06 (m, 1 H), 6.87-6.81 (m, 2 H), 3.79 (s, 3 H), 2.48 (s, 3 H); <sup>13</sup>C NMR (100 MHz, CDCl<sub>3</sub>, ppm): δ = 159.9, 141.5, 134.1, 133.1, 132.1, 128.5, 124.2, 121.8, 115.4, 114.1, 96.0, 85.8, 55.4, 15.1.

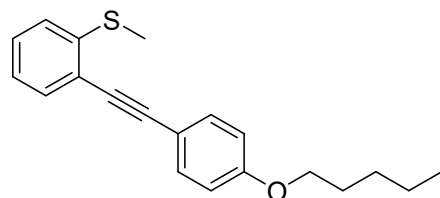

**methyl(2-((4-(pentyloxy)phenyl)ethynyl)phenyl)sulfane (1i)** <sup>18</sup>

Yellow solid (1.24 g, 80% yield). <sup>1</sup>H NMR (400 MHz, CDCl<sub>3</sub>, ppm): δ = 7.50-7.42 (m, 3 H), 7.28-7.24 (m, 1 H), 7.16-7.07 (m, 2 H), 6.87-6.81 (m, 2 H), 3.96-3.92 (m, 2 H), 2.49 (s, 3 H), 1.81-1.75 (m, 2 H), 1.47-1.35 (m, 4 H), 0.95-0.91 (m, 3 H); <sup>13</sup>C NMR (100 MHz, CDCl<sub>3</sub>, ppm): δ = 159.3, 141.3, 133.9, 133.0, 131.9, 128.3, 124.1,

123.9, 121.6, 114.4, 96.0, 85.5, 68.0, 28.8, 28.1, 22.4, 15.0, 14.0.

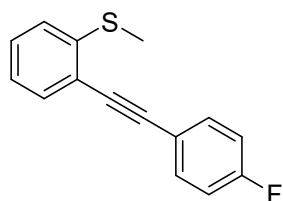

**(2-((4-fluorophenyl)ethynyl)phenyl)(methyl)sulfane (1j)** <sup>18l</sup>

Yellow solid (0.97 g, 80% yield). <sup>1</sup>H NMR (400 MHz, CDCl<sub>3</sub>, ppm): δ = 7.49-7.46 (m, 2 H), 7.39 (d, *J* = 7.6 Hz, 1 H), 7.24-7.20 (m, 1 H), 7.10 (d, *J* = 7.6 Hz, 1 H), 7.03 (t, *J* = 7.6 Hz, 1 H), 6.99-6.94 (m, 2 H), 2.43 (s, 3 H); <sup>13</sup>C NMR (100 MHz, CDCl<sub>3</sub>, ppm): δ = 164.0, 161.5, 141.8, 133.6 (d, *J* = 9 Hz, 1 C), 132.3, 129.0, 124.3 (d, *J* = 14 Hz, 1 C), 121.3, 119.4 (d, *J* = 4 Hz, 1 C), 115.7 (d, *J* = 22 Hz, 1 C), 94.9, 86.7, 15.2.

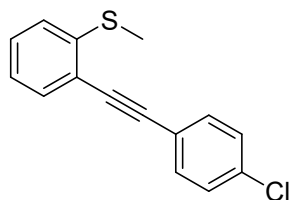

**(2-((4-chlorophenyl)ethynyl)phenyl)(methyl)sulfane (1k)** <sup>18l</sup>

Yellow solid (1.09 g, 85% yield). <sup>1</sup>H NMR (400 MHz, CDCl<sub>3</sub>, ppm): δ = 7.50-7.45 (m, 3 H), 7.32-7.27 (m, 3 H), 7.16 (d, *J* = 8 Hz, 1 H), 7.12-7.08 (m, 1 H), 2.49 (s, 3 H); <sup>13</sup>C NMR (100 MHz, CDCl<sub>3</sub>, ppm): δ = 141.7, 134.3, 132.7, 132.2, 128.9, 128.6, 124.2, 123.9, 121.6, 120.8, 94.6, 87.8, 15.0.

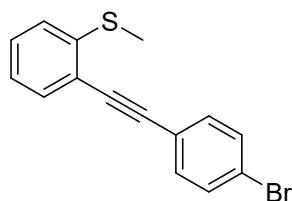

**(2-((4-bromophenyl)ethynyl)phenyl)(methyl)sulfane (1l)** <sup>18l</sup>

yellow oil (1.18 g, 86% yield). <sup>1</sup>H NMR (400 MHz, CDCl<sub>3</sub>, ppm): δ = 7.49-7.45 (m, 3 H), 7.43-7.41 (m, 2 H), 7.33-7.29 (m, 1 H), 7.17 (d, *J* = 7.6 Hz, 1 H), 7.12-7.09 (m, 1 H), 2.50 (s, 3 H); <sup>13</sup>C NMR (100 MHz, CDCl<sub>3</sub>, ppm): δ = 141.8, 133.0, 132.2, 131.6, 129.0, 124.2, 124.0, 122.6, 122.1, 120.9, 94.7, 88.0, 15.0.

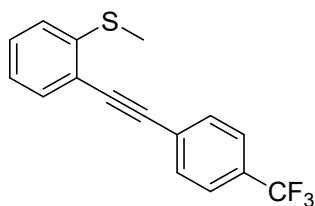

**(2-((1,1'-biphenyl)-4-ylethynyl)phenyl)(methyl)sulfane (1m)** <sup>l8l</sup>

Yellow oil (1.20 g, 82% yield). <sup>1</sup>H NMR (400 MHz, CDCl<sub>3</sub>, ppm): δ = 7.68 (d, *J* = 8 Hz, 2 H), 7.61 (d, *J* = 8.4 Hz, 2 H), 7.52-7.49 (m, 1 H), 7.36-7.31 (m, 1 H), 7.19 (d, *J* = 7.6 Hz, 1 H), 7.15-7.11 (m, 1 H), 2.52 (s, 3 H); <sup>13</sup>C NMR (100 MHz, CDCl<sub>3</sub>, ppm): δ = 142.3, 132.5, 131.9, 130.3, 129.9, 129.4, 127.2, 125.4-125.3 (m, 1C), 124.4, 124.3, 122.7, 120.7, 94.4, 89.4, 15.1.

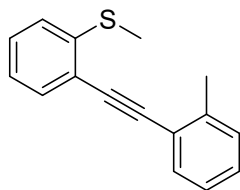

**methyl(2-(*o*-tolylethynyl)phenyl)sulfane (1n)** <sup>l8l</sup>

Yellow oil (0.86 g, 72% yield). <sup>1</sup>H NMR (400 MHz, CDCl<sub>3</sub>, ppm): δ = 7.62-7.60 (m, 1 H), 7.54-7.51 (m, 2 H), 7.45-7.39 (m, 1 H), 7.36 (d, *J* = 8 Hz, 1 H), 7.31-7.22 (m, 3 H), 2.64 (s, 3 H), 2.49 (s, 3 H); <sup>13</sup>C NMR (100 MHz, CDCl<sub>3</sub>, ppm): δ = 141.6, 138.0, 132.1, 132.1, 129.3, 128.6, 128.2, 124.2, 124.0, 122.9, 121.3, 96.0, 86.5, 21.2, 15.0.

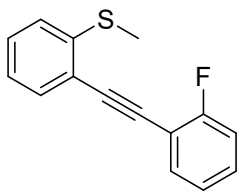

**(2-((2-fluorophenyl)ethynyl)phenyl)(methyl)sulfane (1o)** <sup>l8l</sup>

Colorless oil (0.97 g, 80% yield). <sup>1</sup>H NMR (400 MHz, CDCl<sub>3</sub>, ppm): δ = 7.49-7.46 (m, 1 H), 7.36-7.28 (m, 4 H), 7.17 (d, *J* = 8 Hz, 1 H), 7.13-7.09 (m, 1 H), 7.06-7.01 (m, 1 H), 2.50 (s, 3 H); <sup>13</sup>C NMR (100 MHz, CDCl<sub>3</sub>, ppm): δ = 163.7, 161.3, 142.1, 132.4, 130.0 (d, *J* = 8 Hz, 1 C), 129.2, 127.6 (d, *J* = 3 Hz, 1 C), 125.2 (d, *J* = 10 Hz, 1 C), 124.3 (d, *J* = 15 Hz, 1 C), 120.9, 118.4 (d, *J* = 23 Hz, 1 C), 115.8 (d, *J* = 21 Hz, 1 C), 94.6 (d, *J* = 3 Hz, 1 C), 87.9, 15.2.

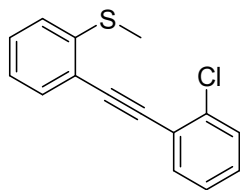

**(2-((2-chlorophenyl)ethynyl)phenyl)(methyl)sulfane (1p)** <sup>181</sup>

Yellow solid (1.09 g, 84% yield). <sup>1</sup>H NMR (400 MHz, CDCl<sub>3</sub>, ppm): δ = 7.54-7.52 (m, 1 H), 7.46-7.44 (m, 1 H), 7.35-7.33 (m, 1 H), 7.25-7.21 (m, 1 H), 7.18-7.15 (m, 2 H), 7.11 (d, *J* = 8 Hz, 1 H), 7.06-7.02 (m, 1 H), 2.43 (s, 3 H); <sup>13</sup>C NMR (100 MHz, CDCl<sub>3</sub>, ppm): δ = 142.0, 135.9, 133.6, 132.8, 129.5, 129.4, 129.2, 126.5, 124.5, 124.4, 123.3, 121.2, 92.6, 92.1, 15.3.

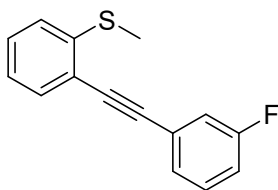

**(2-((3-fluorophenyl)ethynyl)phenyl)(methyl)sulfane (1q)** <sup>181</sup>

Brown oil (0.87 g, 72% yield). <sup>1</sup>H NMR (400 MHz, CDCl<sub>3</sub>, ppm): δ = 7.48-7.46 (m, 1 H), 7.36-7.26 (m, 4 H), 7.17 (d, *J* = 8 Hz, 1 H), 7.12-7.08 (m, 1 H), 7.06-7.03 (m, 1 H), 2.50 (s, 3 H); <sup>13</sup>C NMR (100 MHz, CDCl<sub>3</sub>, ppm): δ = 163.7, 161.3, 142.1, 132.4, 130.0 (d, *J* = 8 Hz, 1 C), 129.2, 127.6 (d, *J* = 3 Hz, 1 C), 125.2 (d, *J* = 10 Hz, 1 C), 124.3 (d, *J* = 16 Hz, 1 C), 120.9, 118.4 (d, *J* = 23 Hz, 1 C), 115.8 (d, *J* = 21 Hz, 1 C), 94.6 (d, *J* = 3 Hz, 1 C), 87.9, 15.2.

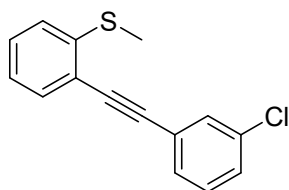

**(2-((3-chlorophenyl)ethynyl)phenyl)(methyl)sulfane (1r)** <sup>181</sup>

Yellow solid (1.03 g, 80% yield). <sup>1</sup>H NMR (400 MHz, CDCl<sub>3</sub>, ppm): δ = 7.56-7.55 (m, 1 H), 7.47-7.42 (m, 2 H), 7.32-7.27 (m, 2 H), 7.24 (d, *J* = 8 Hz, 1 H), 7.16 (d, *J* = 8 Hz, 1 H), 7.12-7.08 (m, 1 H), 2.49 (s, 3 H); <sup>13</sup>C NMR (100 MHz, CDCl<sub>3</sub>, ppm): δ = 141.9, 134.1, 132.2, 131.3, 129.6, 129.5, 129.1, 128.6, 124.8, 124.2, 124.0, 120.7, 94.2, 88.0, 15.0.

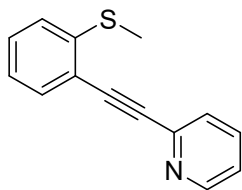

**2-((2-(methylthio)phenyl)ethynyl)pyridine (1s)** <sup>[8]</sup>

Yellow oil (0.889 g, 79% yield). <sup>1</sup>H NMR (400 MHz, CDCl<sub>3</sub>, ppm): δ = 8.60 (t, *J* = 5 Hz, 1 H), 7.71-7.64 (m, 1 H), 7.59 (d, *J* = 7.6 Hz, 1 H), 7.55 (d, *J* = 7.6 Hz, 1 H), 7.36-7.29 (m, 2 H), 7.18 (d, *J* = 8 Hz, 1 H), 7.12 (t, *J* = 7.6 Hz, 1 H), 2.51 (s, 3 H); <sup>13</sup>C NMR (100 MHz, CDCl<sub>3</sub>, ppm): δ = 149.9, 143.2, 142.4, 136.4, 132.8, 129.6, 127.5, 124.3, 124.2, 123.6, 123.0, 94.6, 87.0, 15.1.

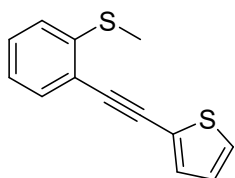

**2-((2-(methylthio)phenyl)ethynyl)thiophene (1t)** <sup>[8]</sup>

Yellow oil (1.04 g, 90% yield). <sup>1</sup>H NMR (400 MHz, CDCl<sub>3</sub>, ppm): δ = 7.44 (d, *J* = 7.6 Hz, 1 H), 7.30-7.25 (m, 3 H), 7.15 (d, *J* = 8 Hz, 1 H), 7.08 (t, *J* = 7.2 Hz, 1 H), 6.98 (t, *J* = 4.8 Hz, 1 H), 2.47 (s, 3 H); <sup>13</sup>C NMR (100 MHz, CDCl<sub>3</sub>, ppm): δ = 141.7, 132.2, 132.1, 129.0, 127.6, 127.2, 124.3, 123.1, 121.1, 90.6, 89.0, 15.2.

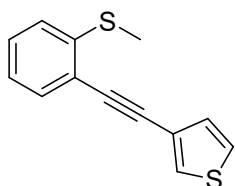

**3-((2-(methylthio)phenyl)ethynyl)thiophene (1u)** <sup>[8]</sup>

Yellow oil (0.94 g, 82% yield). <sup>1</sup>H NMR (400 MHz, CDCl<sub>3</sub>, ppm): δ = 7.55-7.53 (m, 1 H), 7.45 (d, *J* = 7.6 Hz, 1 H), 7.28-7.24 (m, 2 H), 7.22 (d, *J* = 7.6 Hz, 1 H), 7.14 (d, *J* = 8.0 Hz, 1 H), 7.10-7.06 (m, 1 H), 2.47 (s, 3 H); <sup>13</sup>C NMR (100 MHz, CDCl<sub>3</sub>, ppm): δ = 141.6, 132.2, 129.9, 128.8, 128.7, 125.4, 124.3, 124.2, 122.2, 121.3, 91.0, 86.5, 15.1.

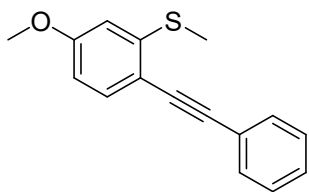

**(5-methoxy-2-(phenylethynyl)phenyl)(methyl)sulfane (1v)** <sup>[8]</sup>

Yellow oil (0.79 g, 62% yield). <sup>1</sup>H NMR (400 MHz, CDCl<sub>3</sub>, ppm): δ = 7.56-7.53 (m, 2 H), 7.40 (d, *J* = 8.4 Hz, 1 H), 7.34-7.28 (m, 3 H), 6.69 (s, 1 H), 6.63-6.60 (m, 1 H), 3.79 (s, 3 H), 2.47 (s, 3 H); <sup>13</sup>C NMR (100 MHz, CDCl<sub>3</sub>, ppm): δ = 160.2, 143.5, 133.6, 131.5, 128.4, 128.1, 123.6, 113.8, 110.8, 109.4, 94.4, 87.0, 55.4, 15.1.

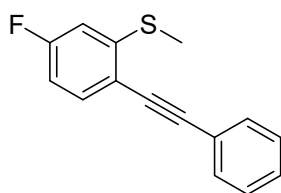

**(5-fluoro-2-(phenylethynyl)phenyl)(methyl)sulfane (1w)** <sup>[8]</sup>

Yellow oil (0.80 g, 66% yield). <sup>1</sup>H NMR (400 MHz, CDCl<sub>3</sub>, ppm): δ = 7.57-7.55 (m, 2 H), 7.46-7.42 (m, 1 H), 7.36-7.34 (m, 3 H), 6.87-6.84 (m, 1 H), 6.82-6.78 (m, 1 H), 3.63 (s, 1 H), 2.48 (s, 3 H); <sup>13</sup>C NMR (100 MHz, CDCl<sub>3</sub>, ppm): δ = 163.0 (d, *J* = 249 Hz, 1 C), 144.9 (d, *J* = 8 Hz, 1 C), 133.8 (d, *J* = 9 Hz, 1 C), 131.7, 128.5 (d, *J* = 10 Hz, 1 C), 123.1, 117.0, 111.5, 111.2, 111.1, 111.0, 95.7, 85.9, 15.1.

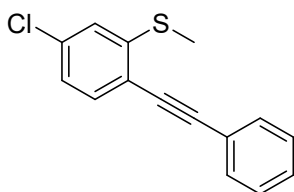

**(5-chloro-2-(phenylethynyl)phenyl)(methyl)sulfane (1x)** <sup>[8]</sup>

Yellow oil (0.72 g, 56% yield). <sup>1</sup>H NMR (400 MHz, CDCl<sub>3</sub>, ppm): δ = 7.56-7.54 (m, 2 H), 7.35-7.31 (m, 4 H), 7.07-7.02 (m, 2 H), 2.45 (s, 3 H); <sup>13</sup>C NMR (100 MHz, CDCl<sub>3</sub>, ppm): δ = 144.0, 134.9, 133.0, 131.6, 128.7, 128.4, 124.4, 123.6, 122.9, 119.5, 96.8, 86.0, 15.0.

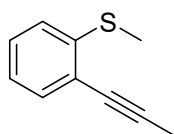

**methyl(2-(prop-1-yn-1-yl)phenyl)sulfane (1aa)** <sup>[8]</sup>

Yellow oil (0.61 g, 75% yield). <sup>1</sup>H NMR (400 MHz, CDCl<sub>3</sub>, ppm): δ = 7.36-6.35 (d, *J* = 7.6 Hz, 1 H), 7.26-7.22 (m, 1 H), 7.13-7.11 (d, *J* = 8.0 Hz, 1 H), 7.07-7.03 (m, 1 H), 2.48-2.47 (d, *J* = 2.4 Hz, 3 H), 2.14-2.13 (d, *J* = 1.6 Hz, 3 H); <sup>13</sup>C NMR (100 MHz, CDCl<sub>3</sub>, ppm): δ = 140.9, 132.1, 127.9, 123.9, 123.6, 121.6, 92.5, 77.1, 14.8, 4.4.

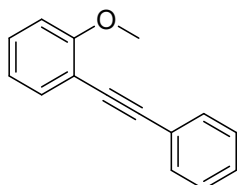

**1-methoxy-2-(phenylethynyl)benzene (1ab)** <sup>[8]</sup>

Yellow oil (0.95 g, 85% yield). <sup>1</sup>H NMR (400 MHz, CDCl<sub>3</sub>, ppm): δ = 7.57-7.55 (m, 2 H), 7.51-7.49 (m, 1 H), 7.35-7.27 (m, 4 H), 6.95-6.87 (m, 2 H), 3.89 (s, 3 H); <sup>13</sup>C NMR (100 MHz, CDCl<sub>3</sub>, ppm): δ = 159.8, 135.5, 131.6, 129.7, 128.2, 128.1, 123.5, 120.4, 112.3, 110.6, 93.4, 85.7, 55.8.

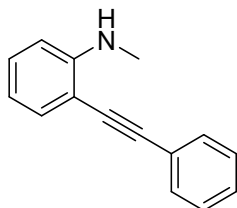

**N-methyl-2-(phenylethynyl)aniline (1ac)** <sup>[8]</sup>

Yellow oil (0.95 g, 85% yield). <sup>1</sup>H NMR (400 MHz, CDCl<sub>3</sub>, ppm): δ = 7.57-7.55 (m, 2 H), 7.51-7.49 (m, 1 H), 7.35-7.27 (m, 4 H), 6.95-6.87 (m, 2 H), 3.89 (s, 3 H); <sup>13</sup>C NMR (100 MHz, CDCl<sub>3</sub>, ppm): δ = 195.8, 135.5, 131.6, 129.7, 128.2, 128.1, 123.5, 120.4, 112.3, 110.6, 93.4, 85.7, 55.8.

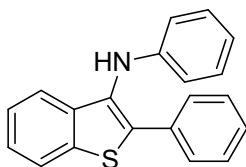

**N,2-diphenylbenzo[b]thiophen-3-amine (3a)**

White solid (68.65 mg, 76% yield). melting point: 136-138 °C. <sup>1</sup>H NMR (400 MHz, CDCl<sub>3</sub>, ppm): δ = 7.81 (d, *J* = 8.0 Hz, 1 H), 7.60 (d, *J* = 7.2 Hz, 2 H), 7.52 (d, *J* = 7.2

Hz, 1 H), 7.39-7.28 (m, 5 H), 7.20-7.16 (m, 2 H), 6.83 (t,  $J = 7.2$  Hz, 1 H), 6.71 (d,  $J = 7.6$  Hz, 2 H), 5.51 (s, 1 H);  $^{13}\text{C}$  NMR (100 MHz,  $\text{CDCl}_3$ , ppm):  $\delta = 146.4, 137.3, 137.1, 134.3, 133.4, 129.5, 129.4, 129.1, 128.7, 128.4, 125.0, 124.4, 122.8, 122.7, 119.4, 114.9$ ; HRMS calcd for  $\text{C}_{20}\text{H}_{16}\text{NS}$   $[\text{M}+\text{H}]^+$  302.0998; found: 302.0999.

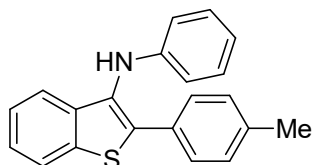

### ***N*-phenyl-2-(*p*-tolyl)benzo[*b*]thiophen-3-amine (3b)**

Yellow oil (52.94 mg, 56% yield).  $^1\text{H}$  NMR (600 MHz,  $\text{CDCl}_3$ , ppm):  $\delta = 7.80$  (d,  $J = 7.8$  Hz, 1 H), 7.50 (t,  $J = 7.8$  Hz, 3 H), 7.32 (t,  $J = 7.2$  Hz, 1 H), 7.28 (t,  $J = 7.2$  Hz, 1 H), 7.18 (t,  $J = 7.2$  Hz, 4 H), 6.82 (t,  $J = 7.2$  Hz, 1 H), 6.70 (d,  $J = 7.8$  Hz, 2 H), 5.48 (s, 1 H), 2.35 (s, 3 H);  $^{13}\text{C}$  NMR (150 MHz,  $\text{CDCl}_3$ , ppm):  $\delta = 146.6, 138.4, 137.5, 137.0, 134.7, 130.5, 129.8, 129.5, 129.2, 128.6, 124.8, 124.4, 122.7, 122.6, 119.3, 114.8, 21.4$ ; HRMS calcd for  $\text{C}_{21}\text{H}_{18}\text{NS}$   $[\text{M}+\text{H}]^+$  316.1155; found: 316.1165.

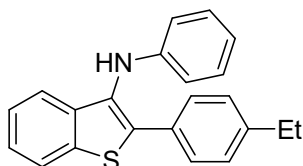

### **2-(4-ethylphenyl)-*N*-phenylbenzo[*b*]thiophen-3-amine (3c)**

Grey solid (48.38 mg, 49% yield). melting point: 101-103 °C.  $^1\text{H}$  NMR (400 MHz,  $\text{CDCl}_3$ , ppm):  $\delta = 7.80$  (d,  $J = 7.6$  Hz, 1 H), 7.54-7.50 (m, 3 H), 7.35-7.28 (m, 2 H), 7.22-7.17 (m, 4 H), 6.82 (t,  $J = 7.6$  Hz, 1 H), 6.71 (d,  $J = 7.6$  Hz, 2 H), 5.50 (s, 1 H), 2.68-2.62 (m, 2 H), 1.24 (t,  $J = 7.6$  Hz, 3 H);  $^{13}\text{C}$  NMR (100 MHz,  $\text{CDCl}_3$ , ppm):  $\delta = 146.6, 144.7, 137.4, 137.0, 134.7, 130.6, 129.5, 129.2, 128.7, 128.6, 124.8, 124.4, 122.7, 122.6, 119.2, 114.8, 28.8, 15.5$ ; HRMS calcd for  $\text{C}_{22}\text{H}_{20}\text{NS}$   $[\text{M}+\text{H}]^+$  330.1311; found: 330.1312.

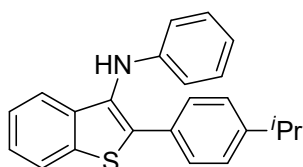

### ***N*-phenyl-2-(4-propylphenyl)benzo[*b*]thiophen-3-amine (3d)**



White solid (42.21 mg, 41% yield). melting point: 139-140 °C. <sup>1</sup>H NMR (400 MHz, CDCl<sub>3</sub>, ppm): δ = 7.79 (d, *J* = 7.6 Hz, 1 H), 7.53-7.50 (m, 3 H), 7.34-7.25 (m, 2 H), 7.20-7.16 (m, 4 H), 6.82 (t, *J* = 7.2 Hz, 1 H), 6.71 (d, *J* = 7.6 Hz, 2 H), 2.58 (t, *J* = 7.2 Hz, 2 H), 1.68-1.59 (m, 2 H), 0.94 (t, *J* = 7.2 Hz, 3 H); <sup>13</sup>C NMR (100 MHz, CDCl<sub>3</sub>, ppm): δ = 146.6, 143.2, 137.4, 137.0, 134.6, 130.7, 129.5, 129.2, 129.1, 128.5, 124.8, 124.4, 122.7, 122.6, 119.2, 114.8, 37.9, 24.5, 14.0; HRMS calcd for C<sub>23</sub>H<sub>22</sub>NS [M+H]<sup>+</sup> 344.1468; found: 344.1468.

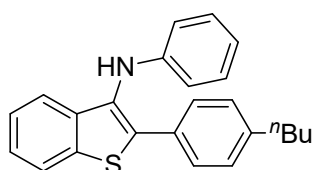

### 2-(4-butylphenyl)-*N*-phenylbenzo[*b*]thiophen-3-amine (3e)

Yellow solid (62.14 mg, 58% yield). melting point: 114-116 °C. <sup>1</sup>H NMR (400 MHz, CDCl<sub>3</sub>, ppm): δ = 7.72 (d, *J* = 8.0 Hz, 1 H), 7.43 (d, *J* = 8.0 Hz, 3 H), 7.27-7.18 (m, 2 H), 7.13-7.09 (m, 4 H), 6.75 (t, *J* = 7.6 Hz, 1 H), 6.63 (d, *J* = 7.6 Hz, 2 H), 2.53 (t, *J* = 7.6 Hz, 2 H), 1.56-1.48 (m, 2 H), 1.33-1.24 (m, 2 H), 0.85 (t, *J* = 7.6 Hz, 3 H); <sup>13</sup>C NMR (100 MHz, CDCl<sub>3</sub>, ppm): δ = 146.6, 143.4, 137.4, 137.0, 134.6, 130.6, 129.5, 129.2, 128.6, 124.8, 124.4, 122.7, 122.6, 119.2, 114.8, 35.5, 33.6, 22.5, 14.1; HRMS calcd for C<sub>24</sub>H<sub>24</sub>NS [M+H]<sup>+</sup> 358.1624; found: 358.1624.

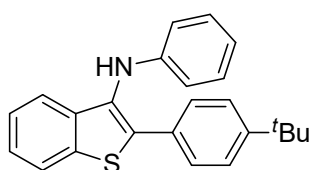

### 2-(4-(*tert*-butyl)phenyl)-*N*-phenylbenzo[*b*]thiophen-3-amine (3f)

Yellow solid (53.57 mg, 50% yield). melting point: 155-157 °C. <sup>1</sup>H NMR (400 MHz, CDCl<sub>3</sub>, ppm): δ = 7.80 (d, *J* = 7.6 Hz, 1 H), 7.55 (d, *J* = 8.4 Hz, 2 H), 7.51 (d, *J* = 7.6 Hz, 1 H), 7.40 (d, *J* = 8.4 Hz, 2 H), 7.35-7.26 (m, 2 H), 7.19 (t, *J* = 7.6 Hz, 2 H), 6.83 (t, *J* = 7.6 Hz, 1 H), 6.72 (d, *J* = 7.6 Hz, 2 H), 5.52(s, 1 H), 1.32 (s, 9 H); <sup>13</sup>C NMR (100 MHz, CDCl<sub>3</sub>, ppm): δ = 151.5, 146.7, 137.5, 137.0, 134.7, 130.4, 129.5, 129.2, 128.4, 126.1, 124.8, 124.4, 122.7, 119.3, 114.8, 34.8, 31.4; HRMS calcd for C<sub>24</sub>H<sub>24</sub>NS [M+H]<sup>+</sup> 358.1624; found: 358.1627.

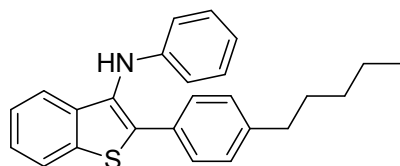

**2-(4-pentylphenyl)-N-phenylbenzo[*b*]thiophen-3-amine (3g)**

White solid (43.43 mg, 39% yield). melting point: 113-115 °C. <sup>1</sup>H NMR (400 MHz, CDCl<sub>3</sub>, ppm): δ = 7.72 (d, *J* = 7.6 Hz, 1 H), 7.43 (d, *J* = 8.0 Hz, 3 H), 7.27-7.18 (m, 2 H), 7.12-7.08 (m, 4 H), 6.74 (t, *J* = 7.6 Hz, 1 H), 6.63 (d, *J* = 8.0 Hz, 2 H), 2.52 (t, *J* = 7.6 Hz, 2 H), 1.53 (t, *J* = 7.6 Hz, 2 H), 1.26-1.23 (m, 4 H), 0.81 (t, *J* = 6.8 Hz, 3 H); <sup>13</sup>C NMR (100 MHz, CDCl<sub>3</sub>, ppm): δ = 146.6, 143.4, 137.5, 137.0, 134.7, 130.6, 129.5, 129.2, 128.6, 124.8, 124.4, 122.7, 122.6, 119.2, 114.8, 35.8, 31.6, 31.1, 22.7, 14.2; HRMS calcd for C<sub>25</sub>H<sub>26</sub>NS [M+H]<sup>+</sup> 372.1781; found: 372.1782.

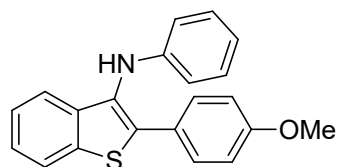

**2-(4-methoxyphenyl)-N-phenylbenzo[*b*]thiophen-3-amine (3h)**

Yellow solid (66.55 mg, 67% yield). melting point: 114-116 °C. <sup>1</sup>H NMR (400 MHz, CDCl<sub>3</sub>, ppm): δ = 7.78 (d, *J* = 8.0 Hz, 1 H), 7.55-7.53 (m, 2 H), 7.49 (d, *J* = 8.0 Hz, 1 H), 7.34-7.25 (m, 2 H), 7.18 (t, *J* = 7.6 Hz, 2 H), 6.91-6.88 (m, 2 H), 6.81 (t, *J* = 7.6 Hz, 1 H), 6.69 (d, *J* = 7.6 Hz, 2 H), 5.44 (s, 1 H), 3.80 (s, 3 H); <sup>13</sup>C NMR (100 MHz, CDCl<sub>3</sub>, ppm): δ = 159.8, 146.6, 137.6, 136.8, 134.7, 130.0, 129.5, 128.7, 125.8, 124.7, 124.4, 122.7, 122.5, 119.2, 114.7, 114.5, 55.5; HRMS calcd for C<sub>21</sub>H<sub>18</sub>NOS [M+H]<sup>+</sup> 332.1104; found: 332.1104.

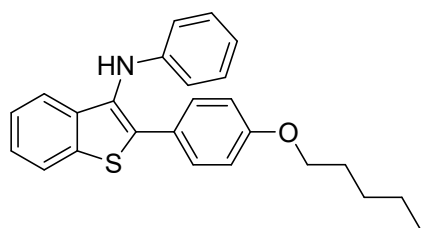

**2-(4-(pentyloxy)phenyl)-N-phenylbenzo[*b*]thiophen-3-amine (3i)**

Yellow solid (59.24 mg, 51% yield). melting point: 114-116 °C. <sup>1</sup>H NMR (400 MHz, CDCl<sub>3</sub>, ppm): δ = 7.77 (d, *J* = 8.0 Hz, 1 H), 7.52-7.48 (m, 3 H), 7.32-7.24 (m, 2 H),

7.17 (t,  $J = 7.6$  Hz, 2 H), 6.87 (d,  $J = 8.4$  Hz, 2 H), 6.82-6.79 (m, 1 H), 6.68 (d,  $J = 8.0$  Hz, 2 H), 5.42 (s, 1 H), 3.93 (t,  $J = 6.8$  Hz, 2 H), 1.80-1.73 (m, 2 H), 1.46-1.32 (m, 4 H), 0.94-0.91 (m, 3 H);  $^{13}\text{C}$  NMR (100 MHz,  $\text{CDCl}_3$ , ppm):  $\delta = 159.4, 146.6, 137.6, 136.7, 134.8, 129.9, 129.5, 128.5, 125.4, 124.6, 124.4, 122.6, 122.5, 119.1, 115.0, 114.6, 68.2, 29.0, 28.3, 22.6, 14.2$ ; HRMS calcd for  $\text{C}_{25}\text{H}_{26}\text{NOS}$   $[\text{M}+\text{H}]^+$  388.1730; found: 388.1737.

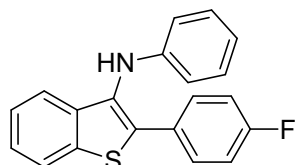

### 2-(4-fluorophenyl)-*N*-phenylbenzo[*b*]thiophen-3-amine (3j)

Yellow solid (61.26 mg, 64% yield). melting point: 122-123 °C.  $^1\text{H}$  NMR (600 MHz,  $\text{CDCl}_3$ , ppm):  $\delta = 7.80$  (d,  $J = 7.8$  Hz, 1 H), 7.58-7.55 (m, 2 H), 7.51 (d,  $J = 7.8$  Hz, 1 H), 7.35-7.33 (m, 1 H), 7.29 (t,  $J = 7.2$  Hz, 1 H), 7.18 (t,  $J = 7.8$  Hz, 2 H), 7.06-7.03 (m, 2 H), 6.82 (t,  $J = 7.2$  Hz, 1 H), 6.68 (d,  $J = 7.8$  Hz, 2 H), 5.42 (s, 1 H);  $^{13}\text{C}$  NMR (150 MHz,  $\text{CDCl}_3$ , ppm):  $\delta = 163.5, 161.9, 146.3, 137.3, 136.9, 133.5, 130.4$  (d,  $J = 7.5$  Hz, 1 C), 129.5, 129.4 (d,  $J = 7.5$  Hz, 1 C), 125.1, 124.5, 122.7 (d,  $J = 10.5$  Hz, 1 C), 119.4, 116.1, 116.0, 114.7; HRMS calcd for  $\text{C}_{20}\text{H}_{15}\text{FNS}$   $[\text{M}+\text{H}]^+$  320.0904; found: 320.0899.

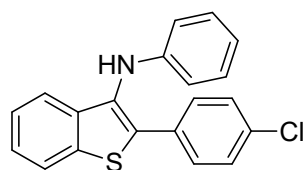

### 2-(4-chlorophenyl)-*N*-phenylbenzo[*b*]thiophen-3-amine (3k)

White solid (78.40 mg, 78% yield). melting point: 132-133 °C.  $^1\text{H}$  NMR (400 MHz,  $\text{CDCl}_3$ , ppm):  $\delta = 7.79$  (d,  $J = 8.0$  Hz, 1 H), 7.54-7.50 (m, 3 H), 7.36-7.26 (m, 4 H), 7.19-7.15 (m, 2 H), 6.82 (t,  $J = 7.6$  Hz, 1 H), 6.67 (d,  $J = 7.6$  Hz, 2 H), 5.42 (s, 1 H);  $^{13}\text{C}$  NMR (100 MHz,  $\text{CDCl}_3$ , ppm):  $\delta = 146.1, 137.3, 137.0, 134.3, 133.2, 131.8, 129.8, 129.6, 129.2, 125.2, 124.6, 122.8, 122.7, 119.5, 114.7$ ; HRMS calcd for  $\text{C}_{20}\text{H}_{15}\text{ClNS}$   $[\text{M}+\text{H}]^+$  336.0608; found: 336.0605.

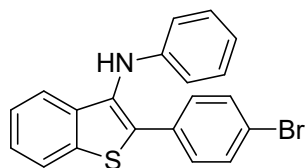

### 2-(4-bromophenyl)-*N*-phenylbenzo[*b*]thiophen-3-amine (3l)

White solid (70.49 mg, 62% yield). melting point: 143-144 °C. <sup>1</sup>H NMR (400 MHz, CDCl<sub>3</sub>, ppm): δ = 7.80 (d, *J* = 8.0 Hz, 1 H), 7.52 (d, *J* = 8.0 Hz, 1 H), 7.48 (s, 4 H), 7.37-7.27 (m, 2 H), 7.18 (t, *J* = 8.0 Hz, 2 H), 6.83 (t, *J* = 7.6 Hz, 1 H), 6.69 (d, *J* = 7.6 Hz, 2 H), 5.44 (s, 1 H); <sup>13</sup>C NMR (100 MHz, CDCl<sub>3</sub>, ppm): δ = 146.1, 137.3, 137.0, 133.2, 132.2, 130.1, 129.9, 129.6, 125.2, 124.6, 122.8, 122.7, 122.5, 119.5, 114.7; HRMS calcd for C<sub>20</sub>H<sub>15</sub>BrNS [M+H]<sup>+</sup> 380.0103; found: 380.0106.

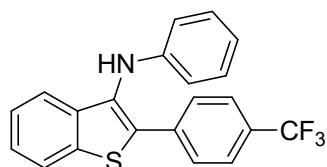

### 2-([1,1'-biphenyl]-4-yl)-*N*-phenylbenzo[*b*]thiophen-3-amine (3m)

Grey solid (73.08 mg, 66% yield). melting point: 137-138 °C. <sup>1</sup>H NMR (400 MHz, CDCl<sub>3</sub>, ppm): δ = 7.81 (d, *J* = 8.0 Hz, 1 H), 7.71 (d, *J* = 8.0 Hz, 2 H), 7.60 (d, *J* = 8.4 Hz, 2 H), 7.54 (d, *J* = 8.0 Hz, 1 H), 7.39-7.28 (m, 2 H), 7.20-7.16 (m, 2 H), 6.84 (d, *J* = 7.2 Hz, 1 H), 6.70-6.68 (m, 2 H), 5.46 (s, 1 H); <sup>13</sup>C NMR (100 MHz, CDCl<sub>3</sub>, ppm): δ = 145.9, 137.3, 137.2, 137.0, 132.6, 130.7, 129.6, 128.8, 126.0 (q, *J* = 4.0 Hz, 1 C), 125.6, 124.7, 122.9 (d, *J* = 6.0 Hz, 1 C), 119.7, 114.8; HRMS calcd for C<sub>21</sub>H<sub>15</sub>F<sub>3</sub>NS [M+H]<sup>+</sup> 370.0872; found: 370.0864.

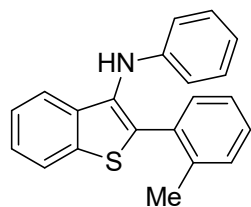

### *N*-phenyl-2-(*o*-tolyl)benzo[*b*]thiophen-3-amine (3n)

Yellow solid (57.66 mg, 61% yield). melting point: 149-151 °C. <sup>1</sup>H NMR (400 MHz, CDCl<sub>3</sub>, ppm): δ = 7.82 (d, *J* = 8.0 Hz, 1 H), 7.50 (d, *J* = 7.6 Hz, 1 H), 7.37-7.18 (m, 6 H), 7.13 (t, *J* = 8.0 Hz, 2 H), 6.80 (d, *J* = 7.6 Hz, 1 H), 6.68 (d, *J* = 8.0 Hz, 2 H), 5.42

(s, 1 H), 2.26 (s, 3 H);  $^{13}\text{C}$  NMR (100 MHz,  $\text{CDCl}_3$ , ppm):  $\delta = 145.5, 138.3, 138.0, 135.7, 132.2, 131.4, 131.2, 131.1, 130.7, 129.2, 128.9, 126.1, 124.7, 124.1, 123.1, 122.7, 119.5, 115.6, 20.6$ ; HRMS calcd for  $\text{C}_{21}\text{H}_{18}\text{NS}$   $[\text{M}+\text{H}]^+$  316.1155; found: 316.1164.

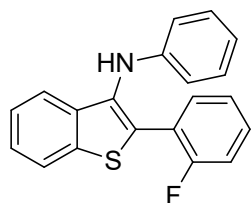

### 2-(2-fluorophenyl)-N-phenylbenzo[b]thiophen-3-amine (3o)

Yellow soild (64.14 mg, 67% yield). melting point: 131-133 °C.  $^1\text{H}$  NMR (400 MHz,  $\text{CDCl}_3$ , ppm):  $\delta = 7.81$  (d,  $J = 8.0$  Hz, 1 H), 7.53 (d,  $J = 7.6$  Hz, 1 H), 7.41-7.27 (m, 5 H), 7.18 (t,  $J = 8.0$  Hz, 2 H), 7.02-6.98 (m, 1 H), 6.83 (t,  $J = 7.2$  Hz, 1 H), 6.70 (d,  $J = 7.6$  Hz, 2 H), 5.49 (s, 1 H);  $^{13}\text{C}$  NMR (100 MHz,  $\text{CDCl}_3$ , ppm):  $\delta = 164.3, 161.9, 146.0, 137.2$  (d,  $J = 11.0$  Hz, 1 C), 135.4 (d,  $J = 8.0$  Hz, 1 C), 130.5 (d,  $J = 8.0$  Hz, 1 C), 130.3, 129.6, 125.3, 124.6, 124.3 (d,  $J = 3.0$  Hz, 1 C), 122.8 (d,  $J = 5.0$  Hz, 1 C), 119.6, 115.6, 115.3 (d,  $J = 10.0$  Hz, 1 C), 115.1, 114.9, 100.1; HRMS calcd for  $\text{C}_{20}\text{H}_{15}\text{FNS}$   $[\text{M}+\text{H}]^+$  320.0904; found: 320.0904.

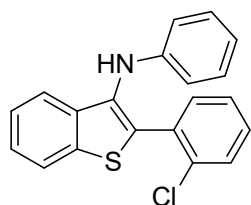

### 2-(2-chlorophenyl)-N-phenylbenzo[b]thiophen-3-amine (3p)

Yellow soild (63.32 mg, 63% yield). melting point: 152-154 °C.  $^1\text{H}$  NMR (400 MHz,  $\text{CDCl}_3$ , ppm):  $\delta = 7.83$  (d,  $J = 8.0$  Hz, 1 H), 7.54 (d,  $J = 8.0$  Hz, 1 H), 7.48-7.42 (m, 2 H), 7.39-7.35 (m, 1 H), 7.32-7.25 (m, 3 H), 7.11 (t,  $J = 8.0$  Hz, 2 H), 6.77 (t,  $J = 7.6$  Hz, 1 H), 6.66 (d,  $J = 7.6$  Hz, 1 H), 5.59 (s, 1 H);  $^{13}\text{C}$  NMR (100 MHz,  $\text{CDCl}_3$ , ppm):  $\delta = 145.5, 138.2, 135.7, 134.5, 132.9, 132.0, 130.1, 129.2, 129.1, 127.0, 125.1, 124.2, 123.3, 122.7, 119.3, 115.4$ ; HRMS calcd for  $\text{C}_{20}\text{H}_{15}\text{ClNS}$   $[\text{M}+\text{H}]^+$  336.0608; found: 336.0605.

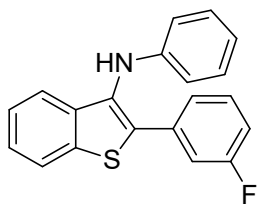

**2-(3-fluorophenyl)-N-phenylbenzo[b]thiophen-3-amine (3q)**

Yellow solid (45.95 mg, 48% yield). melting point: 107-108 °C. <sup>1</sup>H NMR (400 MHz, CDCl<sub>3</sub>, ppm): δ = 7.81 (d, *J* = 7.6 Hz, 1 H), 7.53 (d, *J* = 8.0 Hz, 1 H), 7.41-7.27 (m, 5 H), 7.20-7.16 (m, 2 H), 7.02-6.98 (m, 1 H), 6.83 (d, *J* = 7.6 Hz, 1 H), 6.71-6.69 (m, 2 H), 5.49 (s, 1 H); <sup>13</sup>C NMR (100 MHz, CDCl<sub>3</sub>, ppm): δ = 164.3, 161.8, 146.0, 137.2 (d, *J* = 11.0 Hz, 1 C), 135.4 (d, *J* = 9.0 Hz, 1 C), 132.7, 130.5 (d, *J* = 8.0 Hz, 1 C), 130.2, 129.5, 125.3, 124.6, 124.3 (d, *J* = 3.0 Hz, 1 C), 122.8 (d, *J* = 5.0 Hz, 1 C), 119.6, 115.6, 115.3 (d, *J* = 9.0 Hz, 1 C), 115.1, 114.8; HRMS calcd for C<sub>20</sub>H<sub>15</sub>FNS [M+H]<sup>+</sup> 320.0904; found: 320.0904.

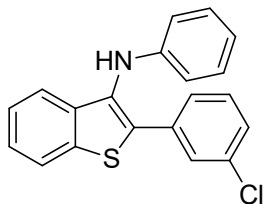

**2-(3-chlorophenyl)-N-phenylbenzo[b]thiophen-3-amine (3r)**

Yellow solid (48.25 mg, 48% yield). melting point: 124-126 °C. <sup>1</sup>H NMR (400 MHz, CDCl<sub>3</sub>, ppm): δ = 7.80 (d, *J* = 8.0 Hz, 1 H), 7.59 (s, 1 H), 7.52 (d, *J* = 8.0 Hz, 1 H), 7.50-7.47 (m, 1 H), 7.37-7.25 (m, 4 H), 7.17 (t, *J* = 8.0 Hz, 2 H), 6.82 (t, *J* = 7.6 Hz, 1 H), 6.68 (d, *J* = 7.6 Hz, 2 H), 5.46 (s, 1 H); <sup>13</sup>C NMR (100 MHz, CDCl<sub>3</sub>, ppm): δ = 146.0, 137.2, 137.1, 135.1, 134.9, 132.5, 130.3, 130.2, 129.5, 128.6, 128.3, 126.6, 125.3, 124.6, 122.9, 122.8, 119.6, 114.8; HRMS calcd for C<sub>20</sub>H<sub>15</sub>ClNS [M+H]<sup>+</sup> 336.0608; found: 336.0608.

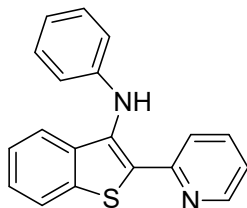

**N-phenyl-2-(pyridin-2-yl)benzo[b]thiophen-3-amine (3s)**

Yellow solid (60.72mg, 67% yield). melting point: 150-151 °C. <sup>1</sup>H NMR (400 MHz, CDCl<sub>3</sub>, ppm): δ = 9.68 (s, 1 H), 8.56 (d, *J* = 4.0 Hz, 1 H), 7.79 (d, *J* = 8.0 Hz, 1 H), 7.70-7.65 (m, 1 H), 7.57 (d, *J* = 8.0 Hz, 1 H), 7.49 (d, *J* = 8.4 Hz, 1 H), 7.36-7.32 (m, 1 H), 7.24-7.20 (m, 3 H), 7.11-7.08 (m, 1 H), 6.97-6.90 (m, 3 H); <sup>13</sup>C NMR (100 MHz, CDCl<sub>3</sub>, ppm): δ = 154.4, 148.6, 144.6, 137.5, 137.1, 136.9, 135.5, 129.1, 125.7, 124.6, 123.8, 122.9, 121.9, 121.6, 121.1, 121.0, 118.9; HRMS calcd for C<sub>19</sub>H<sub>15</sub>N<sub>2</sub>S [M+H]<sup>+</sup> 303.0951; found: 303.0954

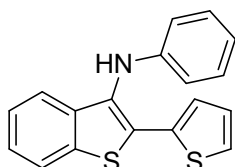

***N*-phenyl-2-(thiophen-2-yl)benzo[*b*]thiophen-3-amine (3t)**

Yellow solid (47.90 mg, 52% yield). melting point: 161-163 °C. <sup>1</sup>H NMR (400 MHz, CDCl<sub>3</sub>, ppm): δ = 7.76 (d, *J* = 7.6 Hz, 1 H), 7.49 (d, *J* = 7.6 Hz, 1 H), 7.36-7.25 (m, 4 H), 7.18 (t, *J* = 7.6 Hz, 2 H), 7.05-7.03 (m, 1 H), 6.81 (t, *J* = 7.6 Hz, 1 H), 6.69 (d, *J* = 7.6 Hz, 2 H), 5.39 (s, 1 H); <sup>13</sup>C NMR (100 MHz, CDCl<sub>3</sub>, ppm): δ = 145.7, 137.5, 136.3, 134.7, 130.8, 129.5, 128.9, 127.2, 126.9, 126.1, 125.3, 124.7, 122.7, 122.3, 119.3, 114.4; HRMS calcd for C<sub>18</sub>H<sub>14</sub>NS<sub>2</sub> [M+H]<sup>+</sup> 308.0562; found: 308.0565.

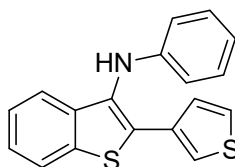

***N*-phenyl-2-(thiophen-3-yl)benzo[*b*]thiophen-3-amine (3u)**

White solid (37.77 mg, 41% yield). melting point: 130-131 °C. <sup>1</sup>H NMR (400 MHz, CDCl<sub>3</sub>, ppm): δ = 7.78 (d, *J* = 7.6 Hz, 1 H), 7.55-7.52 (m, 2 H), 7.40-7.38 (m, 1 H), 7.35-7.27 (m, 3 H), 7.20-7.16 (m, 2 H), 6.81 (t, *J* = 7.6 Hz, 1 H), 6.69 (d, *J* = 7.6 Hz, 2 H), 5.42 (s, 1 H); <sup>13</sup>C NMR (100 MHz, CDCl<sub>3</sub>, ppm): δ = 146.3, 137.6, 136.6, 133.6, 130.9, 129.6, 129.0, 127.4, 126.4, 125.0, 124.6, 123.4, 122.7, 122.3, 119.3, 114.4; HRMS calcd for C<sub>18</sub>H<sub>14</sub>NS<sub>2</sub> [M+H]<sup>+</sup> 308.0562; found: 308.0564.

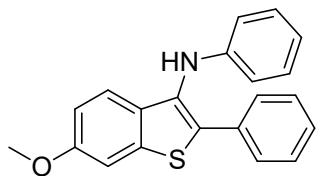

**6-methoxy-N,2-diphenylbenzo[*b*]thiophen-3-amine (3v)**

Brown oil (57.61 mg, 58% yield). <sup>1</sup>H NMR (400 MHz, CDCl<sub>3</sub>, ppm): δ = 7.59-7.57 (m, 2 H), 7.41-7.34 (m, 3 H), 7.31-7.27 (m, 2 H), 7.21-7.17 (m, 2 H), 6.93-6.90 (m, 1 H), 6.83 (t, *J* = 7.2 Hz, 1 H), 6.72 (d, *J* = 7.6 Hz, 2 H), 5.50 (s, 1 H), 3.87 (s, 3 H); <sup>13</sup>C NMR (100 MHz, CDCl<sub>3</sub>, ppm): δ = 158.0, 146.4, 138.5, 133.5, 129.5, 129.1, 128.5, 123.5, 119.3, 114.9, 114.4, 105.3, 55.8; HRMS calcd for C<sub>21</sub>H<sub>18</sub>NOS [M+H]<sup>+</sup> 332.1104; found: 332.1106.

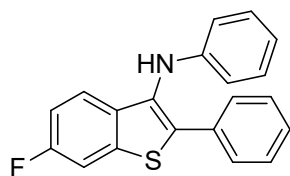

**6-fluoro-N,2-diphenylbenzo[*b*]thiophen-3-amine (3w)**

White solid (63.18 mg, 66% yield). melting point: 132-133 °C. <sup>1</sup>H NMR (400 MHz, CDCl<sub>3</sub>, ppm): δ = 7.57-7.55 (m, 2 H), 7.50-7.43 (m, 2 H), 7.39-7.31 (m, 3 H), 7.21-7.17 (m, 2 H), 7.05-7.00 (m, 1 H), 6.84 (t, *J* = 7.6 Hz, 1 H), 6.69 (d, *J* = 7.6 Hz, 2 H), 5.49 (s, 1 H); <sup>13</sup>C NMR (100 MHz, CDCl<sub>3</sub>, ppm): δ = 160.9 (d, *J* = 244 Hz, 1 C), 146.2, 138.0 (d, *J* = 10.0 Hz, 1 C), 133.7, 133.1, 129.6, 129.2, 128.6, 128.4, 124.0 (d, *J* = 9.0 Hz, 1 C), 119.6, 114.9, 113.4 (d, *J* = 24.0 Hz, 1 C), 108.9 (d, *J* = 25.0 Hz, 1 C); HRMS calcd for C<sub>20</sub>H<sub>15</sub>FNS [M+H]<sup>+</sup> 320.0904; found: 320.0908.

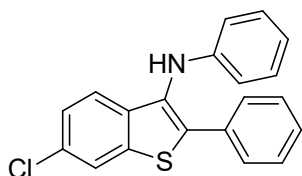

**6-chloro-N,2-diphenylbenzo[*b*]thiophen-3-amine (3x)**

Yellow solid (71.37 mg, 71% yield). melting point: 112-114 °C. <sup>1</sup>H NMR (400 MHz, CDCl<sub>3</sub>, ppm): δ = 7.78 (s, 1 H), 7.57(d, *J* = 7.2 Hz, 2 H), 7.42-7.32 (m, 4 H), 7.25-7.17 (m, 3 H), 6.84 (t, *J* = 7.2 Hz, 1 H), 6.69 (d, *J* = 7.6 Hz, 2 H), 5.48 (s, 1 H); <sup>13</sup>C



NMR (100 MHz, CDCl<sub>3</sub>, ppm):  $\delta$  = 146.1, 138.1, 135.8, 134.5, 132.9, 131.0, 129.6, 129.2, 128.6, 128.5, 127.7, 125.3, 123.7, 122.3, 119.6, 114.9; HRMS calcd for C<sub>20</sub>H<sub>15</sub>CINS [M+H]<sup>+</sup> 336.0608; found: 336.0610.

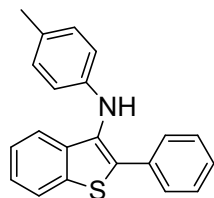

**2-phenyl-N-(p-tolyl)benzo[b]thiophen-3-amine (4a)**

Yellow solid (50.10 mg, 53% yield). melting point: 139-140 °C. <sup>1</sup>H NMR (400 MHz, CDCl<sub>3</sub>, ppm):  $\delta$  = 7.81 (d, *J* = 7.6 Hz, 1 H), 7.60 (d, *J* = 6.8 Hz, 2 H), 7.52 (d, *J* = 7.6 Hz, 1 H), 7.40-7.26 (m, 5 H), 7.00 (d, *J* = 8.4 Hz, 2 H), 6.65 (d, *J* = 8.4 Hz, 2 H), 5.46 (s, 1 H), 2.27 (s, 3 H); <sup>13</sup>C NMR (100 MHz, CDCl<sub>3</sub>, ppm):  $\delta$  = 144.0, 137.3, 137.2, 133.5, 130.1, 130.0, 129.1, 128.7, 128.3, 124.9, 124.3, 122.9, 122.7, 115.1, 20.7; HRMS calcd for C<sub>21</sub>H<sub>18</sub>NS [M+H]<sup>+</sup> 316.1155; found: 316.1156.

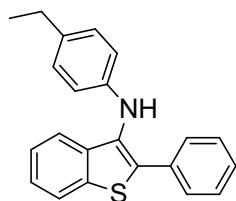

**N-(4-ethylphenyl)-2-phenylbenzo[b]thiophen-3-amine (4b)**

Yellow solid (45.42 mg, 46% yield). melting point: 106-107 °C. <sup>1</sup>H NMR (600 MHz, CDCl<sub>3</sub>, ppm):  $\delta$  = 7.79 (d, *J* = 7.8 Hz, 1 H), 7.60 (d, *J* = 7.2 Hz, 2 H), 7.52 (d, *J* = 7.8 Hz, 1 H), 7.37-7.26 (m, 5 H), 7.01 (d, *J* = 8.4 Hz, 2 H), 6.65 (d, *J* = 7.8 Hz, 2 H), 5.45 (s, 1 H), 2.59-2.55 (m, 2 H), 1.20 (t, *J* = 7.8 Hz, 3 H); <sup>13</sup>C NMR (150 MHz, CDCl<sub>3</sub>, ppm):  $\delta$  = 144.2, 137.3, 137.1, 135.2, 133.5, 133.4, 130.1, 129.1, 128.8, 128.7, 128.2, 124.9, 124.3, 122.9, 122.7, 115.1, 28.1, 15.8; HRMS calcd for C<sub>22</sub>H<sub>20</sub>NS [M+H]<sup>+</sup> 330.1311; found: 330.1312.

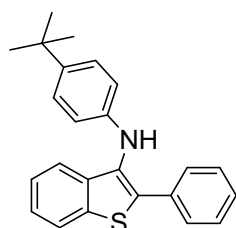

***N*-(4-(*tert*-butyl)phenyl)-2-phenylbenzo[*b*]thiophen-3-amine (4c)**

Grey solid (46.07 mg, 43% yield). melting point: 127-128 °C. <sup>1</sup>H NMR (400 MHz, CDCl<sub>3</sub>, ppm): δ = 7.80 (d, *J* = 7.6 Hz, 1 H), 7.60 (d, *J* = 6.8 Hz, 2 H), 7.53 (d, *J* = 7.2 Hz, 1 H), 7.39-7.26 (m, 5 H), 7.19 (d, *J* = 8.8 Hz, 2 H), 6.68-6.64 (m, 2 H), 5.48 (s, 1 H), 1.28 (s, 9 H); <sup>13</sup>C NMR (100 MHz, CDCl<sub>3</sub>, ppm): δ = 143.8, 142.2, 137.3, 137.1, 133.5, 133.2, 130.2, 129.1, 128.7, 128.2, 126.2, 124.9, 124.3, 123.0, 122.7, 114.8, 34.1, 31.7; HRMS calcd for C<sub>24</sub>H<sub>24</sub>NS [M+H]<sup>+</sup> 358.1624; found: 358.1625.

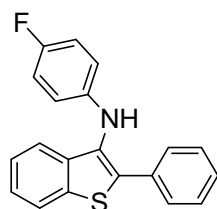

***N*-(4-fluorophenyl)-2-phenylbenzo[*b*]thiophen-3-amine (4d)**

Grey solid (65.09 mg, 68% yield). melting point: 118-120 °C. <sup>1</sup>H NMR (400 MHz, CDCl<sub>3</sub>, ppm): δ = 7.80 (d, *J* = 7.6 Hz, 1 H), 7.57 (d, *J* = 7.2 Hz, 2 H), 7.48 (d, *J* = 7.2 Hz, 1 H), 7.40-7.29 (m, 5 H), 6.91-6.85 (m, 2 H), 6.67-6.62 (m, 2 H), 5.45 (s, 1 H); <sup>13</sup>C NMR (100 MHz, CDCl<sub>3</sub>, ppm): δ = 158.2, 155.8, 142.5, 137.1 (d, *J* = 17.0 Hz, 1 C), 133.8, 133.3, 129.8, 129.1, 128.6, 128.4, 125.0, 124.5, 122.7 (d, *J* = 25.0 Hz, 1 C), 116.1, 116.0, 115.9 (d, *J* = 3.0 Hz, 1 C); HRMS calcd for C<sub>20</sub>H<sub>15</sub>FNS [M+H]<sup>+</sup> 320.0904; found: 320.0905.

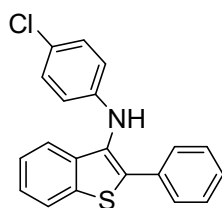

***N*-(4-chlorophenyl)-2-phenylbenzo[*b*]thiophen-3-amine (4e)**

White solid (62.32 mg, 62% yield). melting point: 148-150 °C. <sup>1</sup>H NMR (400 MHz, CDCl<sub>3</sub>, ppm): δ = 7.81 (d, *J* = 7.6 Hz, 1 H), 7.57 (d, *J* = 6.8 Hz, 2 H), 7.48 (d, *J* = 7.2 Hz, 1 H), 7.40-7.30 (m, 5 H), 7.14-7.10 (m, 2 H), 6.64-6.60 (m, 2 H), 5.49 (s, 1 H); <sup>13</sup>C NMR (100 MHz, CDCl<sub>3</sub>, ppm): δ = 145.1, 137.2, 137.1, 134.9, 133.1, 129.4, 129.1, 128.9, 128.7, 128.5, 125.1, 124.6, 124.0, 122.8, 122.5, 115.8; HRMS calcd for C<sub>20</sub>H<sub>15</sub>ClNS [M+H]<sup>+</sup> 336.0608; found: 336.0608.

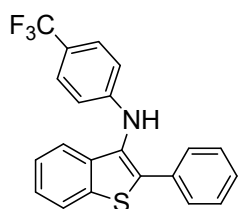

**2-phenyl-N-(4-(trifluoromethyl)phenyl)benzo[*b*]thiophen-3-amine (4f)**

White solid (81.94 mg, 74% yield). melting point: 146-147 °C. <sup>1</sup>H NMR (400 MHz, CDCl<sub>3</sub>, ppm): δ = 7.82 (d, *J* = 8.0 Hz, 1 H), 7.56 (d, *J* = 6.8 Hz, 2 H), 7.47 (d, *J* = 7.6 Hz, 1 H), 7.42-7.31 (m, 7 H), 6.70 (d, *J* = 8.4 Hz, 2 H), 5.69 (s, 1 H); <sup>13</sup>C NMR (100 MHz, CDCl<sub>3</sub>, ppm): δ = 149.3, 137.0 (d, *J* = 13.0 Hz, 1 C), 136.4, 132.9, 129.2, 128.7, 127.9, 126.9 (q, 1 C), 126.3, 125.2, 124.7, 123.6, 122.9, 122.4, 121.0, 120.7, 113.8; HRMS calcd for C<sub>21</sub>H<sub>15</sub>F<sub>3</sub>NS [M+H]<sup>+</sup> 370.0872; found: 370.0877.

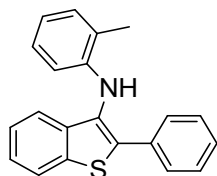

**2-phenyl-N-(*o*-tolyl)benzo[*b*]thiophen-3-amine (4g)**

Brown oil (48.21 mg, 51% yield). <sup>1</sup>H NMR (400 MHz, CDCl<sub>3</sub>, ppm): δ = 7.82 (d, *J* = 7.6 Hz, 1 H), 7.58 (d, *J* = 7.2 Hz, 2 H), 7.45 (d, *J* = 8.0 Hz, 1 H), 7.39-7.28 (m, 5 H), 7.18 (d, *J* = 7.2 Hz, 1 H), 7.01-6.97 (m, 1 H), 6.79 (d, *J* = 7.6 Hz, 1 H), 6.55 (d, *J* = 8.0 Hz, 1 H), 5.35 (s, 1 H), 2.30 (s, 3 H); <sup>13</sup>C NMR (100 MHz, CDCl<sub>3</sub>, ppm): δ = 144.3, 137.3, 137.1, 133.6, 133.4, 130.5, 130.0, 129.2, 128.5, 128.3, 127.2, 125.0, 124.4, 123.4, 122.8, 122.7, 119.4, 114.0, 17.9; HRMS calcd for C<sub>21</sub>H<sub>18</sub>NS [M+H]<sup>+</sup> 316.1155; found: 316.1156.

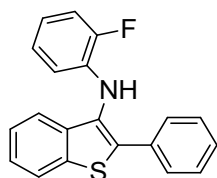

**N-(2-fluorophenyl)-2-phenylbenzo[*b*]thiophen-3-amine (4h)**

Yellow oil (58.39 mg, 61% yield). <sup>1</sup>H NMR (600 MHz, CDCl<sub>3</sub>, ppm): δ = 7.82 (d, *J* = 7.8 Hz, 1 H), 7.61 (d, *J* = 7.8 Hz, 2 H), 7.53 (d, *J* = 7.8 Hz, 1 H), 7.39-7.30 (m, 5 H), 7.10-7.07 (m, 1 H), 6.84 (t, *J* = 7.8 Hz, 1 H), 6.72 (d, *J* = 4.8 Hz, 1 H), 6.55 (t, *J* = 8.4

Hz, 1 H), 5.69 (s, 1 H);  $^{13}\text{C}$  NMR (150 MHz,  $\text{CDCl}_3$ , ppm):  $\delta = 152.6, 151.0, 137.4, 137.2, 135.7, 134.6$  (d,  $J = 10.5$  Hz, 1 C), 133.1, 131.8, 129.1, 128.5 (d,  $J = 10.5$  Hz, 1 C), 125.1, 124.7 (d,  $J = 3.0$  Hz, 1 C), 124.6, 122.8, 122.4, 118.8 (d,  $J = 7.5$  Hz, 1 C), 115.1 (d,  $J = 6.0$  Hz, 1 C), 115.0; HRMS calcd for  $\text{C}_{20}\text{H}_{15}\text{FNS}$   $[\text{M}+\text{H}]^+$  320.0904; found: 320.0915.

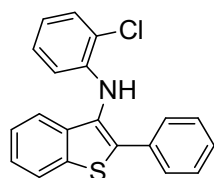

***N*-(2-chlorophenyl)-2-phenylbenzo[*b*]thiophen-3-amine (4i)**

Yellow oil (67.34 mg, 67% yield).  $^1\text{H}$  NMR (400 MHz,  $\text{CDCl}_3$ , ppm):  $\delta = 7.82$  (d,  $J = 7.6$  Hz, 1 H), 7.63-7.61 (m, 2 H), 7.49 (d,  $J = 8.0$  Hz, 1 H), 7.39-7.29 (m, 6 H), 6.99-6.95 (m, 1 H), 6.74-6.70 (m, 1 H), 6.54-6.51 (m, 1 H), 6.03 (s, 1 H);  $^{13}\text{C}$  NMR (100 MHz,  $\text{CDCl}_3$ , ppm):  $\delta = 142.4, 137.4, 137.0, 136.3, 133.0, 129.5, 129.1, 128.5, 128.4, 128.2, 127.9, 125.2, 124.6, 122.8, 122.3, 119.7, 119.3, 114.4$ ; HRMS calcd for  $\text{C}_{20}\text{H}_{15}\text{NSCl}$   $[\text{M}+\text{H}]^+$  336.0608; found: 336.0616.

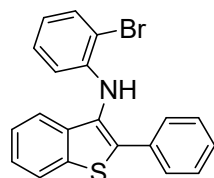

***N*-(2-bromophenyl)-2-phenylbenzo[*b*]thiophen-3-amine (4j)**

Yellow oil (65.95 mg, 58% yield).  $^1\text{H}$  NMR (400 MHz,  $\text{CDCl}_3$ , ppm):  $\delta = 7.82$  (d,  $J = 7.6$  Hz, 1 H), 7.64-7.61 (m, 2 H), 7.53-7.48 (m, 2 H), 7.40-7.29 (m, 5 H), 7.03-6.98 (m, 1 H), 6.68-6.64 (m, 1 H), 6.52-6.50 (m, 1 H), 6.04 (s, 1 H);  $^{13}\text{C}$  NMR (100 MHz,  $\text{CDCl}_3$ , ppm):  $\delta = 143.3, 137.4, 137.0, 136.3, 133.0, 132.7, 129.1, 128.6, 128.5, 128.4, 128.3, 125.2, 124.7, 122.8, 122.4, 119.8, 114.5, 109.9$ ; HRMS calcd for  $\text{C}_{20}\text{H}_{15}\text{BrNS}$   $[\text{M}+\text{H}]^+$  380.0103; found: 380.0104.

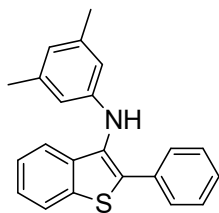

***N*-(3,5-dimethylphenyl)-2-phenylbenzo[*b*]thiophen-3-amine (4k)**

Brown oil (51.34 mg, 52% yield).  $^1\text{H}$  NMR (600 MHz,  $\text{CDCl}_3$ , ppm):  $\delta$  = 7.81 (d,  $J$  = 7.8 Hz, 1 H), 7.61 (d,  $J$  = 7.8 Hz, 2 H), 7.53 (d,  $J$  = 7.8 Hz, 1 H), 7.39-7.27 (m, 5 H), 6.49 (s, 1 H), 6.35 (s, 2 H), 5.41 (s, 1 H), 2.20 (s, 6 H);  $^{13}\text{C}$  NMR (150 MHz,  $\text{CDCl}_3$ , ppm):  $\delta$  = 146.4, 139.2, 137.5, 137.0, 133.9, 133.4, 129.8, 129.1, 128.7, 128.3, 124.9, 124.4, 122.9, 122.7, 121.4, 112.8, 21.6; HRMS calcd for  $\text{C}_{22}\text{H}_{20}\text{NS}$   $[\text{M}+\text{H}]^+$  330.1311; found: 330.1312.

## Reference:

1. J.-X. Yan, J. Xu, Y. Zhou, J.-L. Chen and Q.-L. Song, Photoredox-Catalyzed Cascade Annulation of Methyl(2-(phenylethynyl)phenyl)sulfanes and Methyl(2-(phenylethynyl)phenyl)selanes with Sulfonyl Chlorides: Synthesis of Benzothiophenes and Benzoselenophenes, *Org. Chem. Front.*, 2018, **5**, 1483.
2. S. Mehta, J. P. Waldo and R. C. Larock, Competition studies in alkyne electrophilic cyclization reactions, *J. Org. Chem.*, 2009, **74**, 1141.
3. C.-M. Ting, Y.-L. Hsu and R.-S. Liu, Gold-catalyzed isomerization of unactivated allenes into 1, 3-dienes under ambient conditions, *Chem. Commun.*, 2012, **48**, 6577.
4. G. A. Molander and L. N. Cavalcanti, Nitrosation of aryl and heteroaryltrifluoroborates with nitrosonium tetrafluoroborate, *J. Org. Chem.*, 2012, **77**, 4402.
5. Dolomanov, O.V., Bourhis, L.J., Gildea, R.J, Howard, J.A.K. & Puschmann, H. (2009), *J. Appl. Cryst.*, 42, 339.
6. Sheldrick, G.M. (2015). *Acta Cryst.* A71, 3-8.
7. Sheldrick, G.M. (2015). *Acta Cryst.* C71, 3-8.
8. (a) M.-X. Li, T. Wang, Z.-Y. An and R.-L. Yan, B(C<sub>6</sub>F<sub>5</sub>)<sub>3</sub>-Catalyzed cyclization of alkynes: direct synthesis of 3-silyl heterocyclic compounds, *Chem. Commun.*, 2020, **56**, 11953. (b) X.-X. Gong, M.-J. Wang, S.-Q. Ye and J. Wu, Synthesis of 3-(Methylsulfonyl)benzo[*b*]thiophenes from Methyl(2-alkynylphenyl)sulfanes and Sodium Metabisulfite via a Radical Relay Strategy, *Org. Lett.*, 2019, **21**, 1156. (c) W. Liu, Y.-Q. Hu, X.-Y. Hong, G.-X. Li, X.-B. Huang, W.-X. Gao, M.-C. Liu, Y. Xia, Y.-B. Zhou and H.-Y. Wu, Direct synthesis of 3-acylbenzothiophenes via the radical cyclization of 2-alkynylthioanisoles with  $\alpha$ -oxocarboxylic acids, *Chem. Commun.*, 2018, **54**, 14148. (d) D. Zhang, J.-L. Cai, J.-Z. Du, X.-J. Wang, W. He, Z. Yang, C.-K. Liu, Z. Fang and K. Guo, *J. Org. Chem.*, 2021, **86**, 2593.

## Copies of NMR spectra

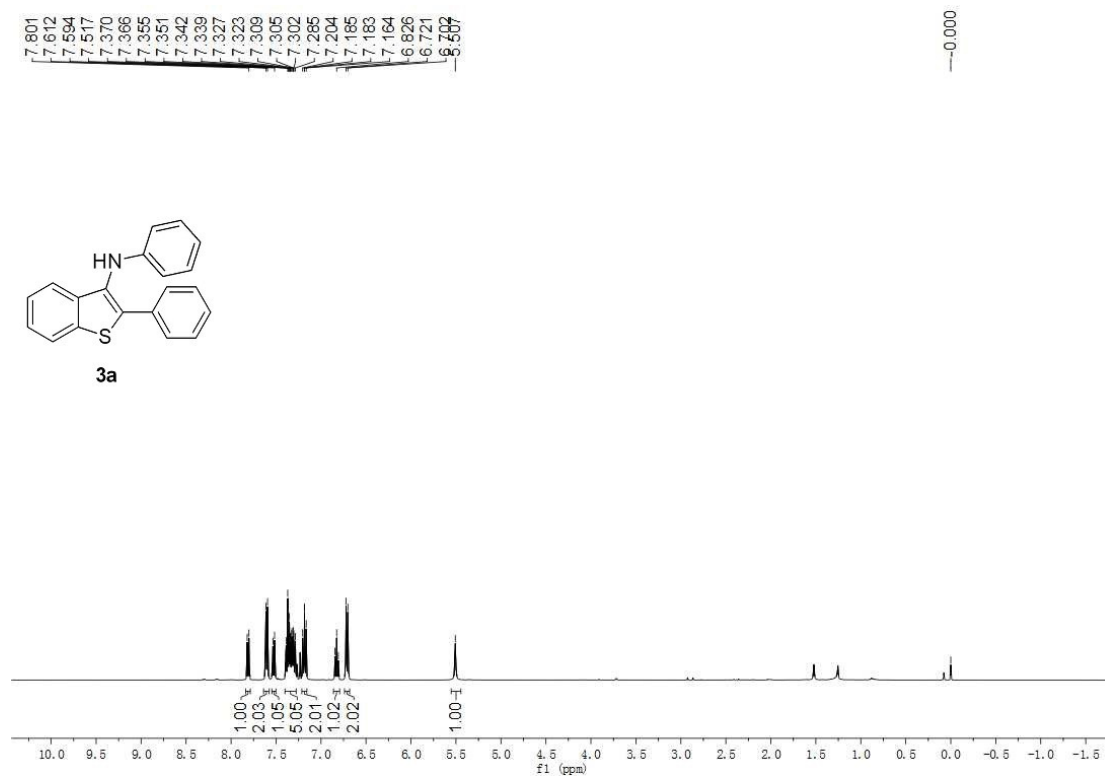

<sup>1</sup>H NMR spectrum of **3a** (400 MHz, CDCl<sub>3</sub>)

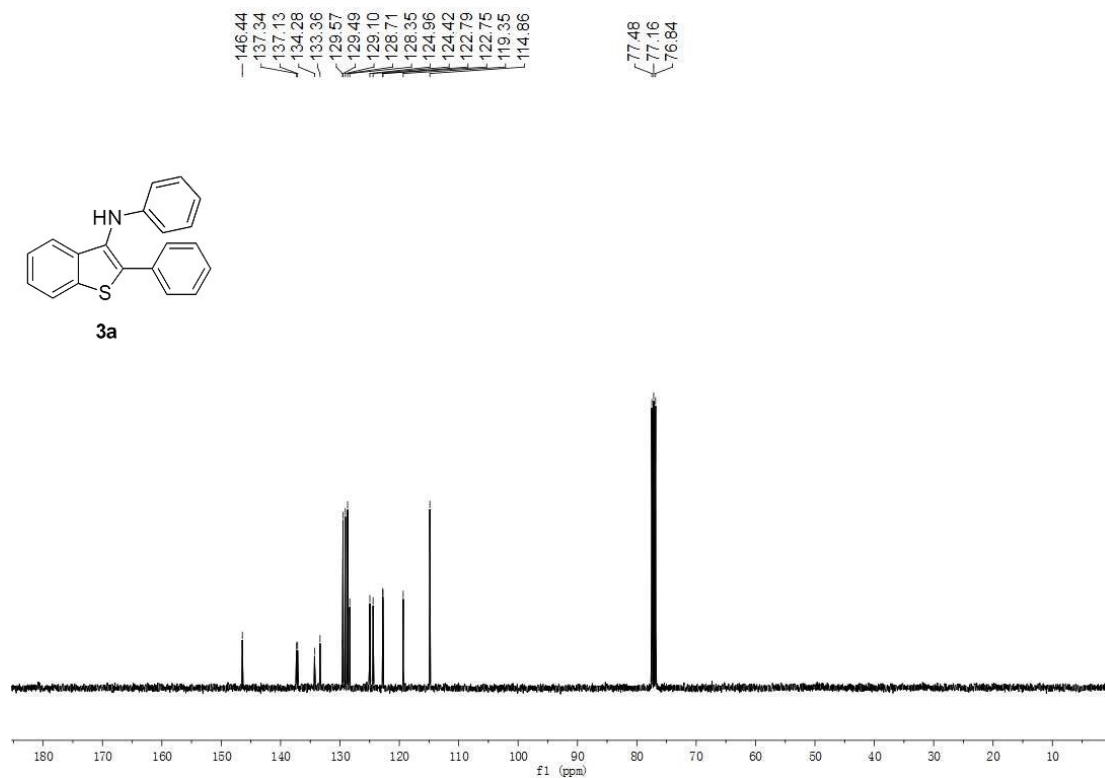

<sup>13</sup>C NMR spectrum of **3a** (100 MHz, CDCl<sub>3</sub>)

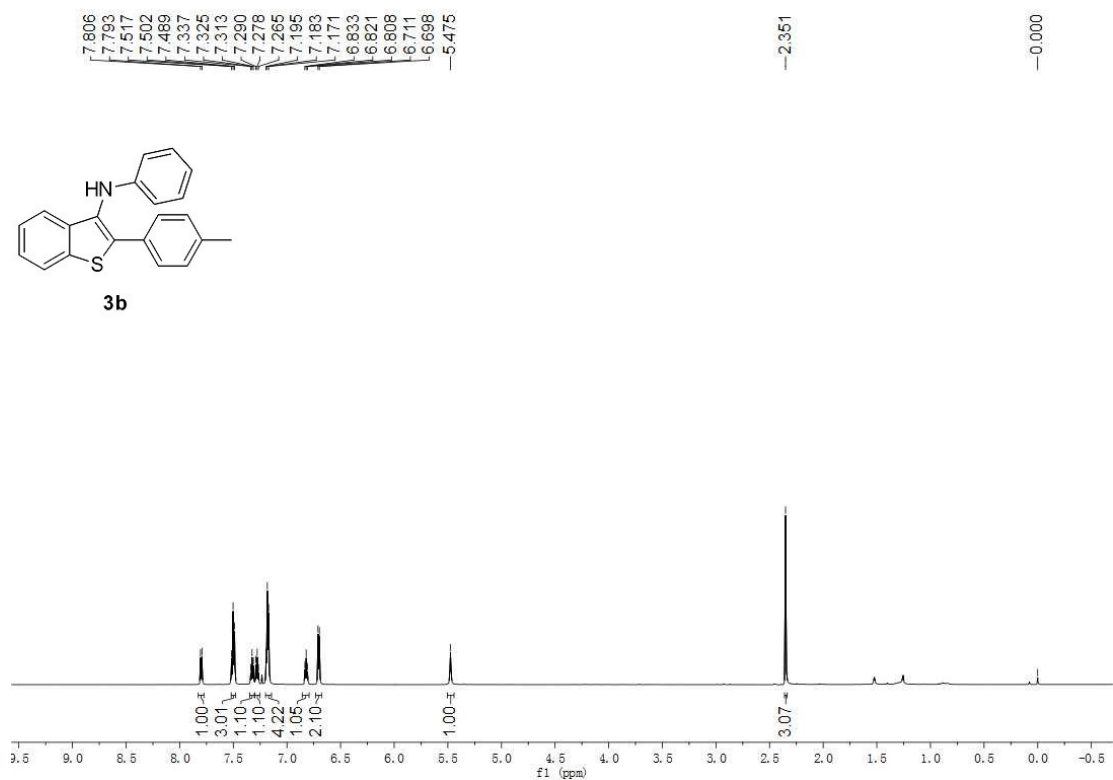

<sup>1</sup>H NMR spectrum of **3b** (600 MHz, CDCl<sub>3</sub>)

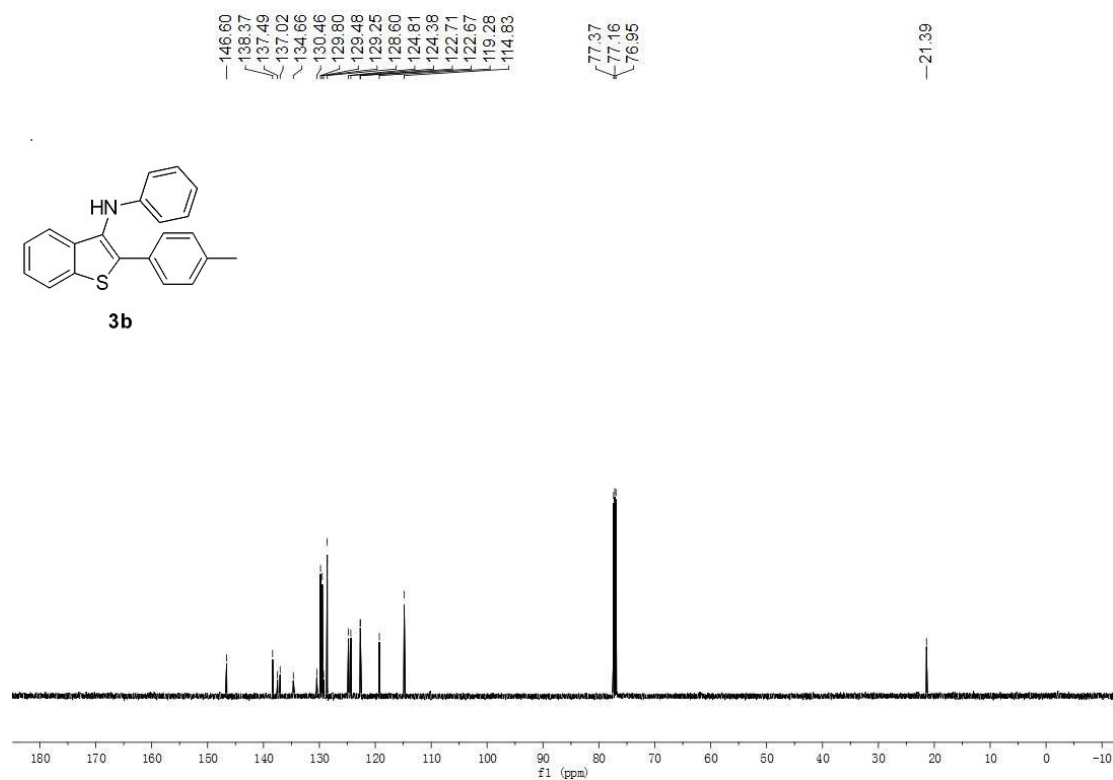

<sup>13</sup>C NMR spectrum of **3b** (150 MHz, CDCl<sub>3</sub>)



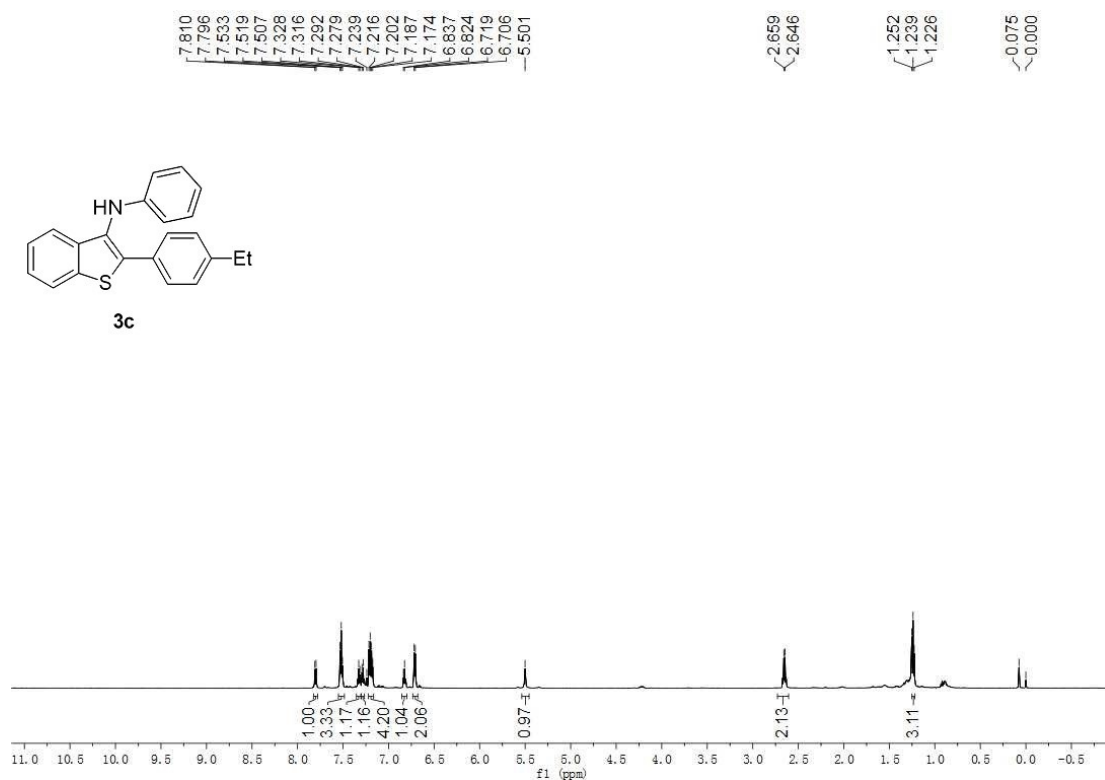

<sup>1</sup>H NMR spectrum of **3c** (400 MHz, CDCl<sub>3</sub>)

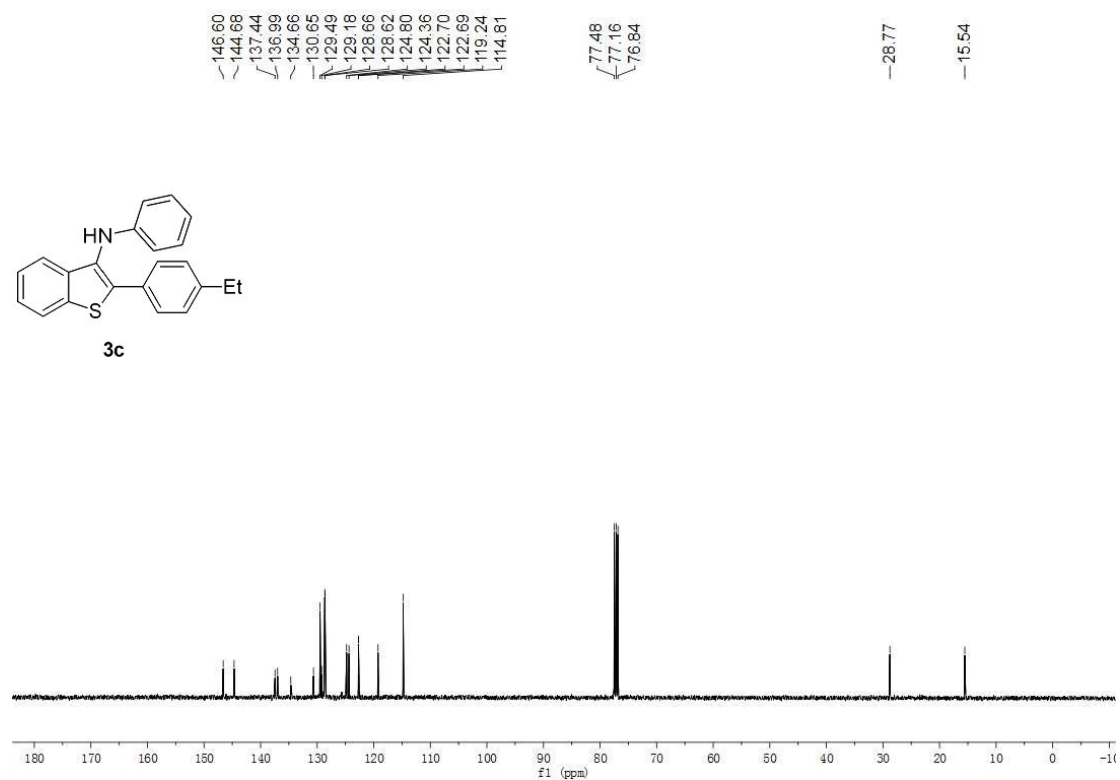

<sup>13</sup>C NMR spectrum of **3c** (100 MHz, CDCl<sub>3</sub>)

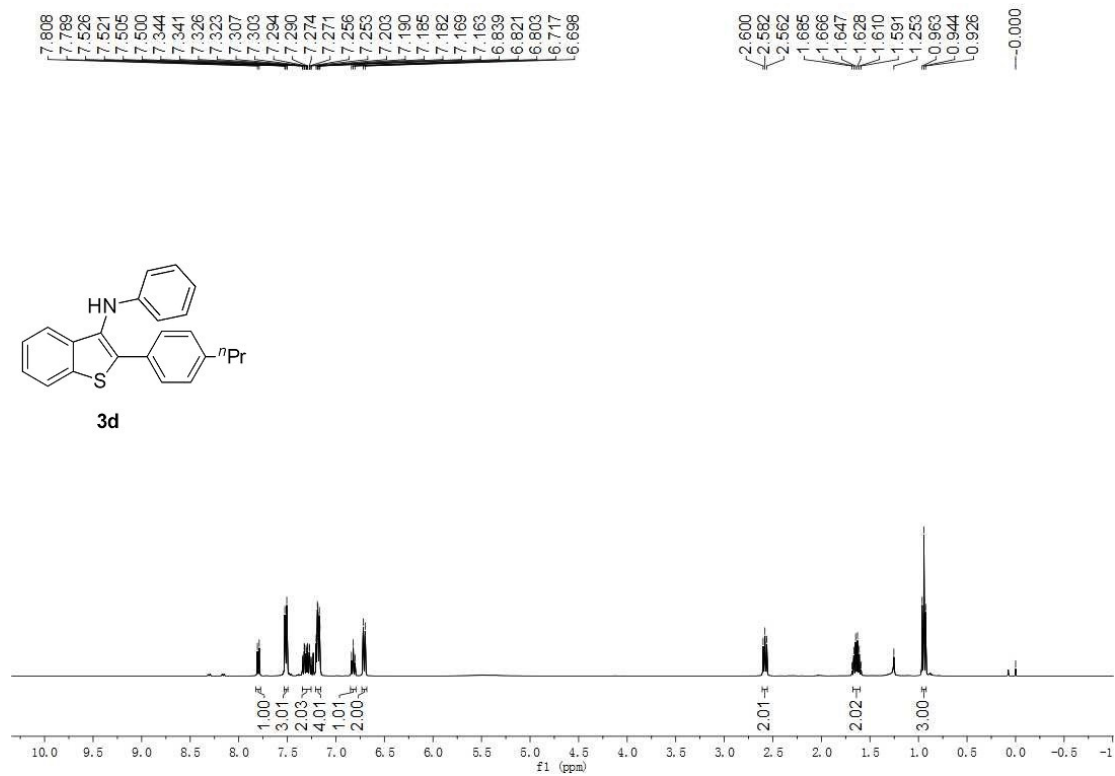

$^1\text{H}$  NMR spectrum of **3d** (400 MHz,  $\text{CDCl}_3$ )

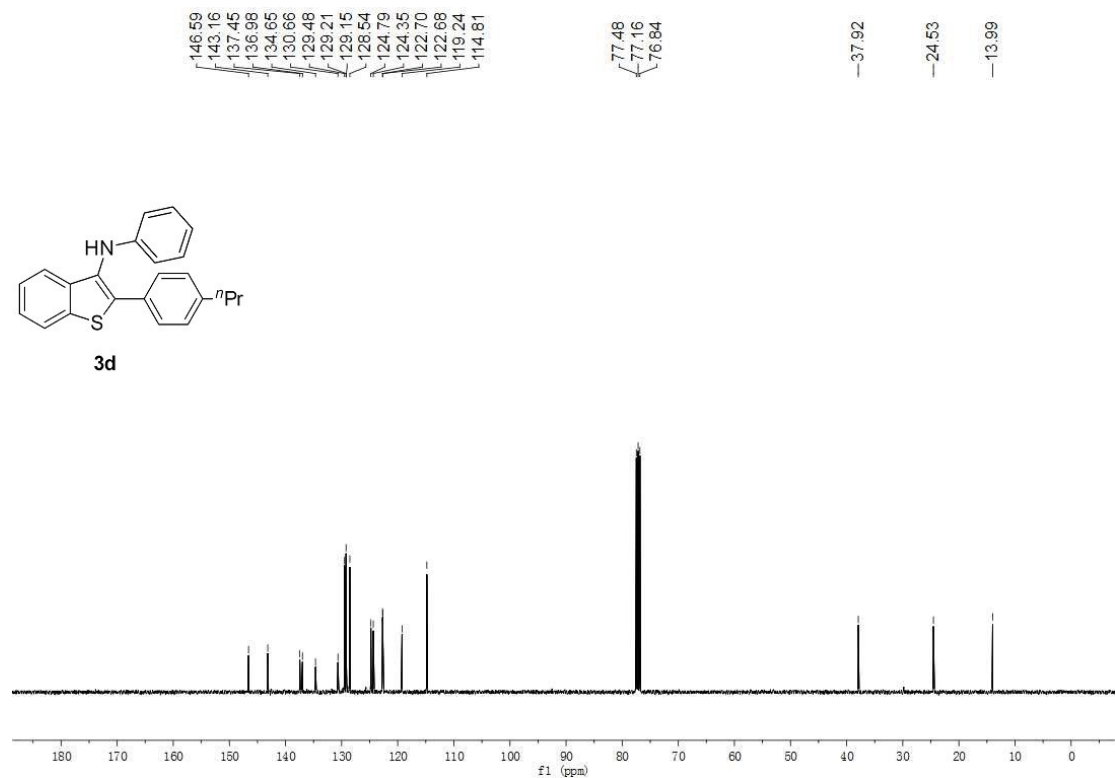

$^{13}\text{C}$  NMR spectrum of **3d** (100 MHz,  $\text{CDCl}_3$ )

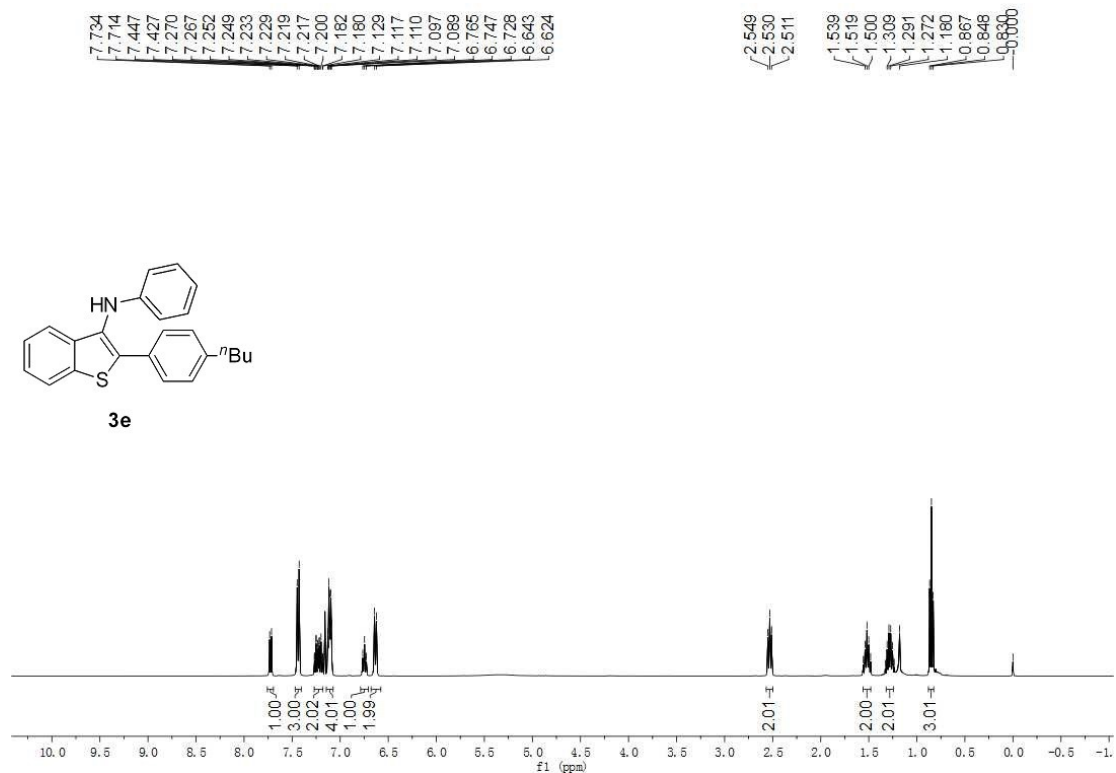

<sup>1</sup>H NMR spectrum of **3e** (400 MHz, CDCl<sub>3</sub>)

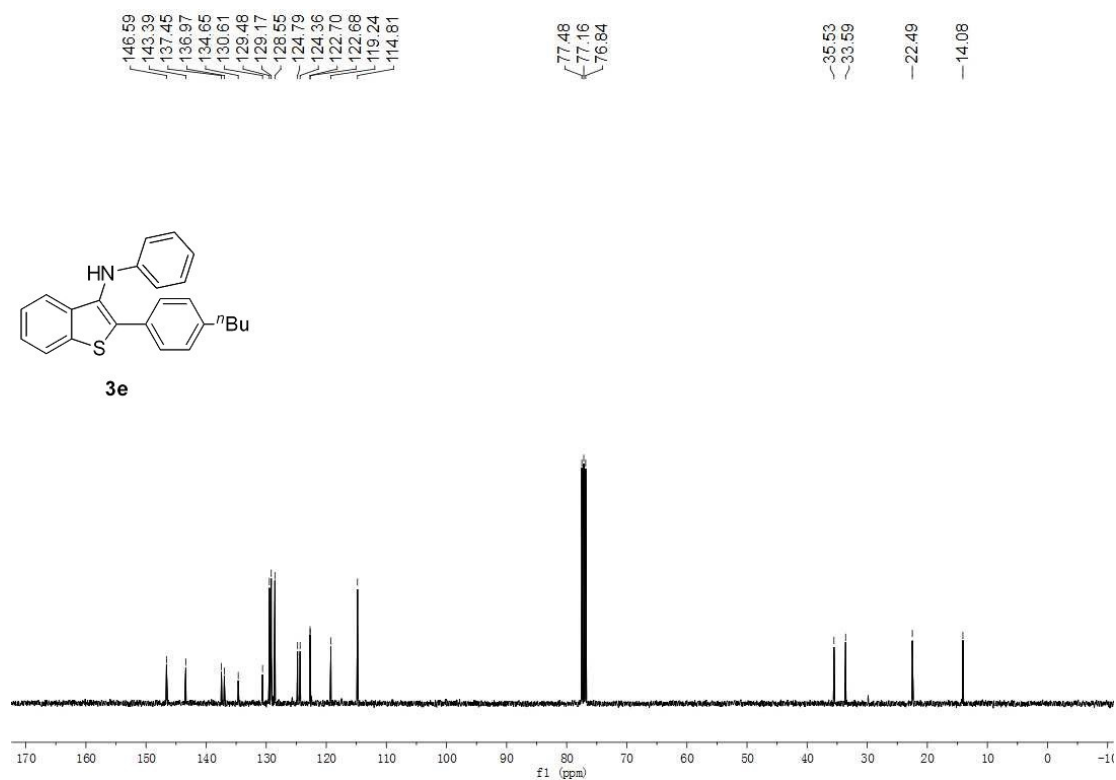

<sup>13</sup>C NMR spectrum of **3e** (100 MHz, CDCl<sub>3</sub>)

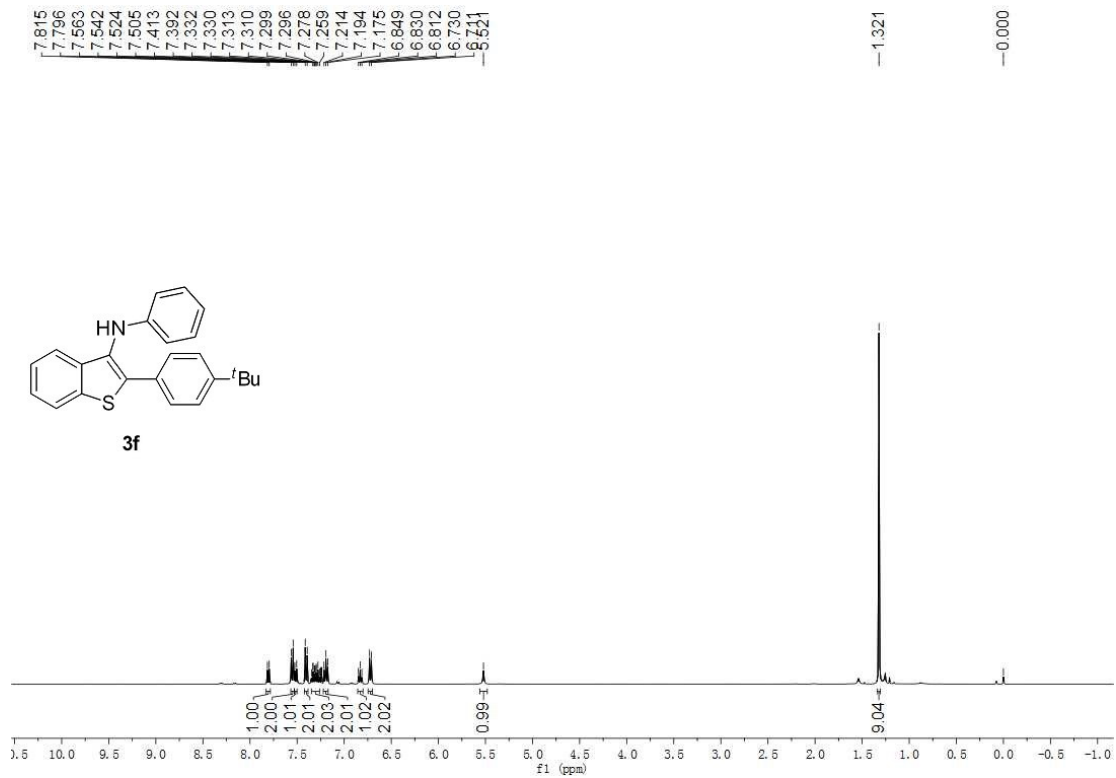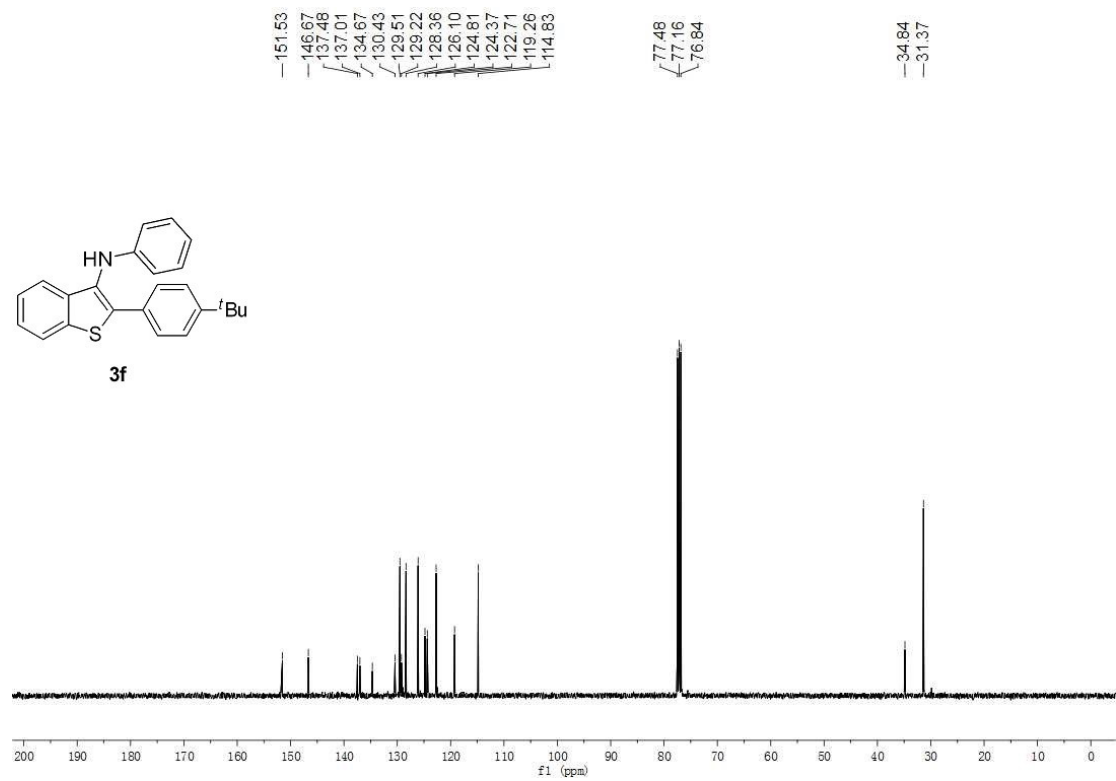

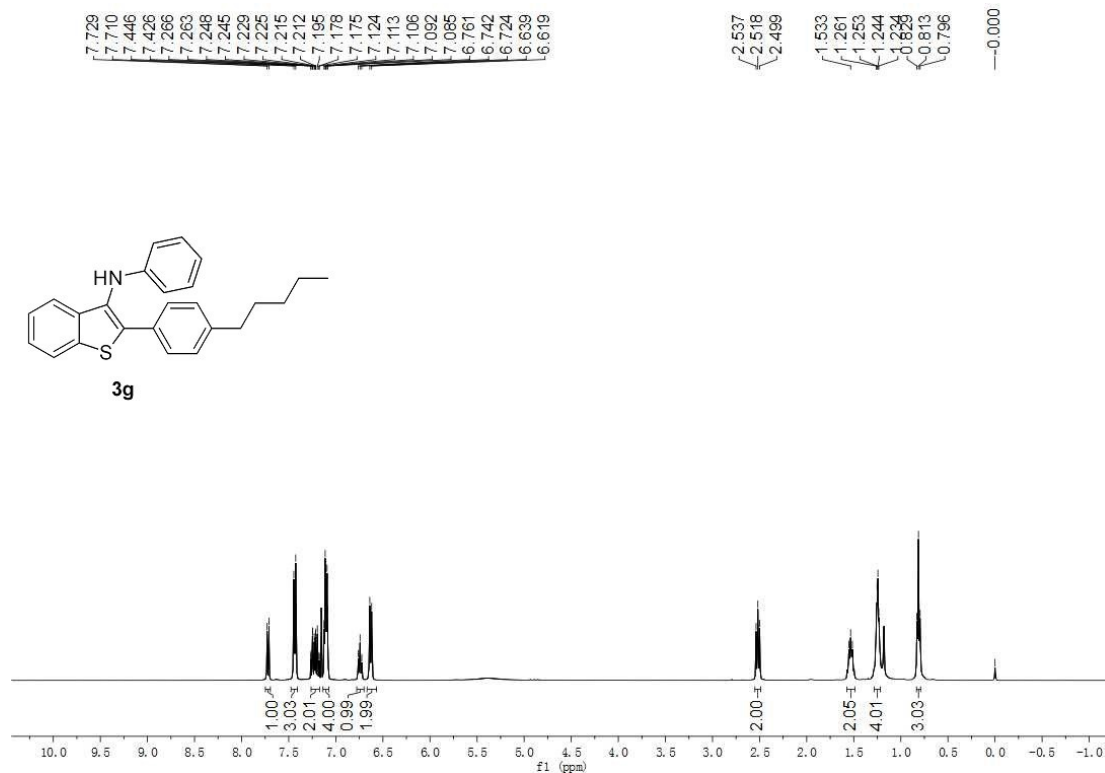

<sup>1</sup>H NMR spectrum of **3g** (400 MHz, CDCl<sub>3</sub>)

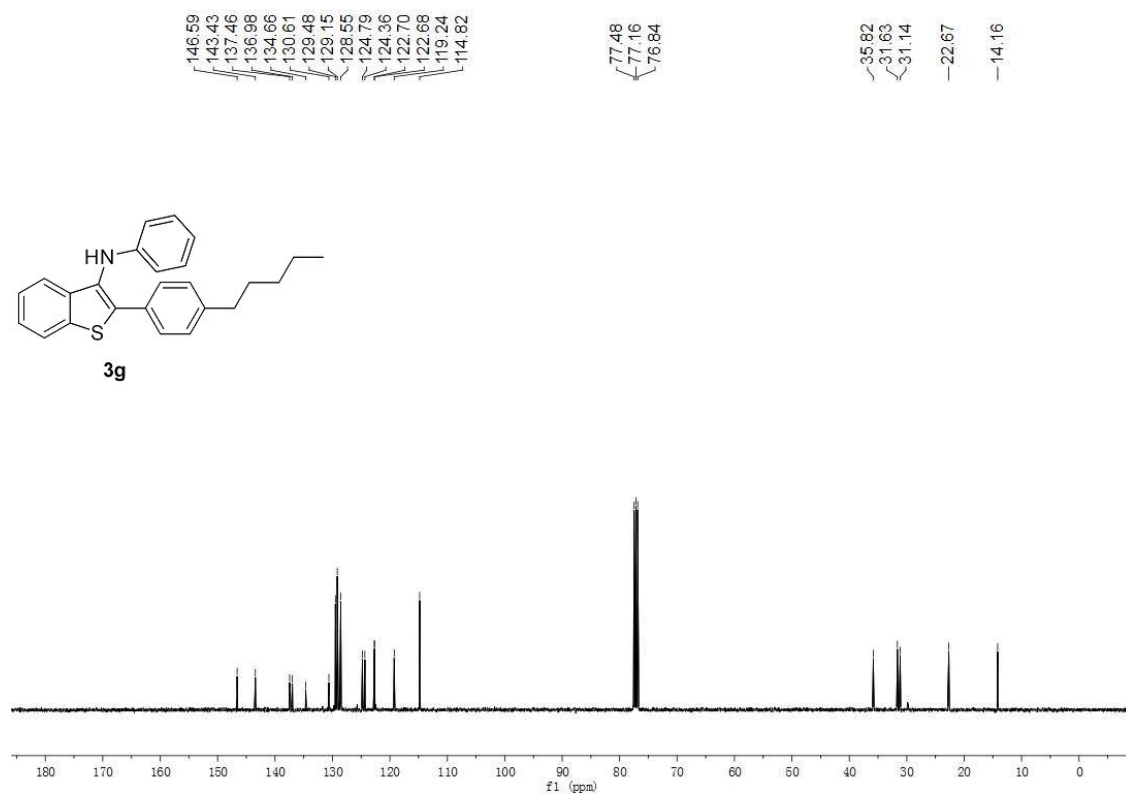

<sup>13</sup>C NMR spectrum of **3g** (100 MHz, CDCl<sub>3</sub>)

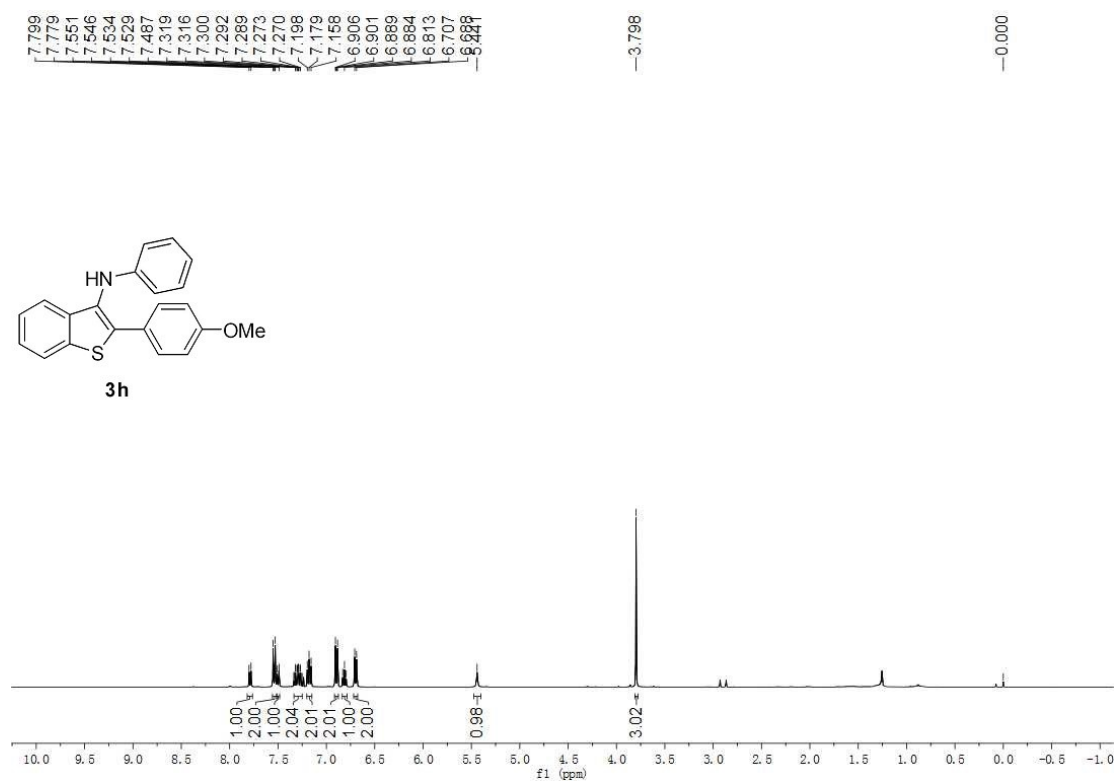

<sup>1</sup>H NMR spectrum of **3h** (400 MHz, CDCl<sub>3</sub>)

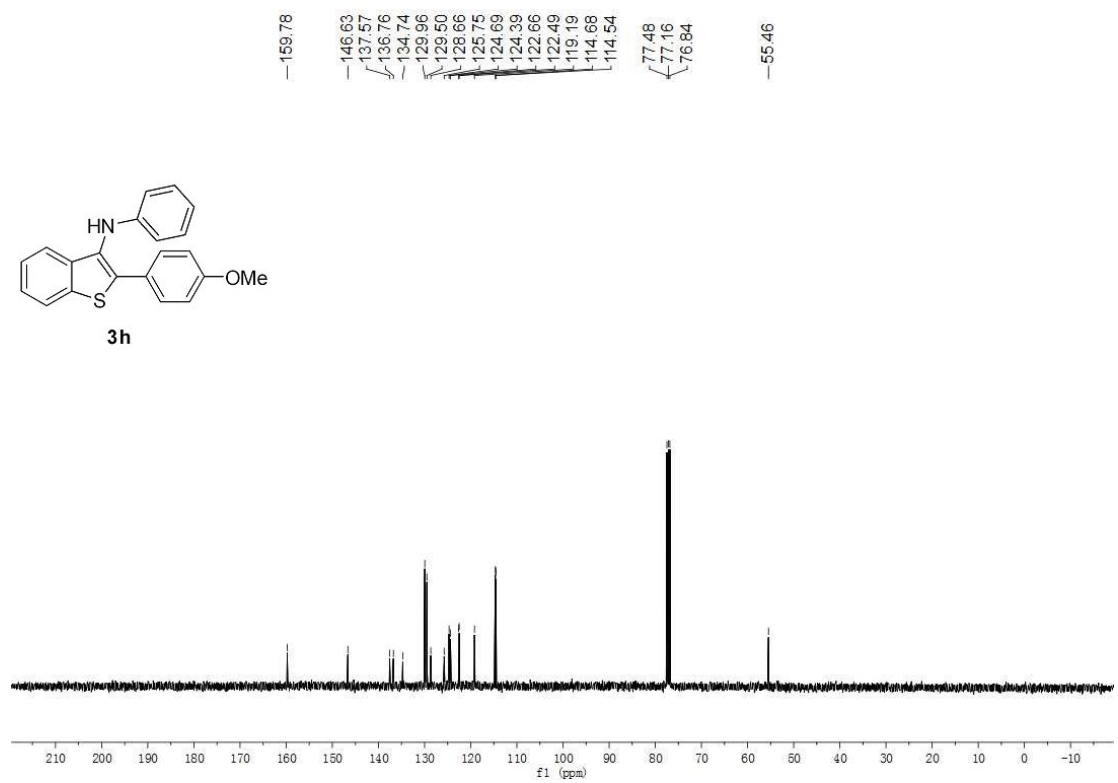

<sup>13</sup>C NMR spectrum of **3h** (100 MHz, CDCl<sub>3</sub>)

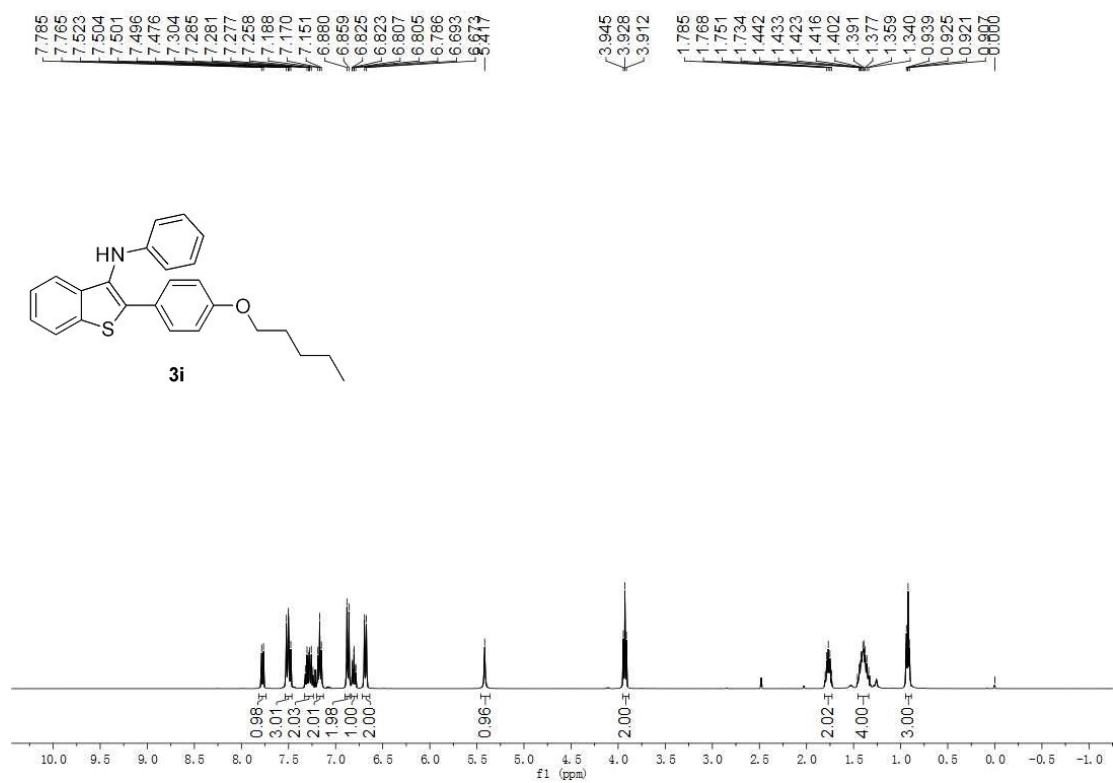

**<sup>1</sup>H NMR spectrum of 3i (400 MHz, CDCl<sub>3</sub>)**

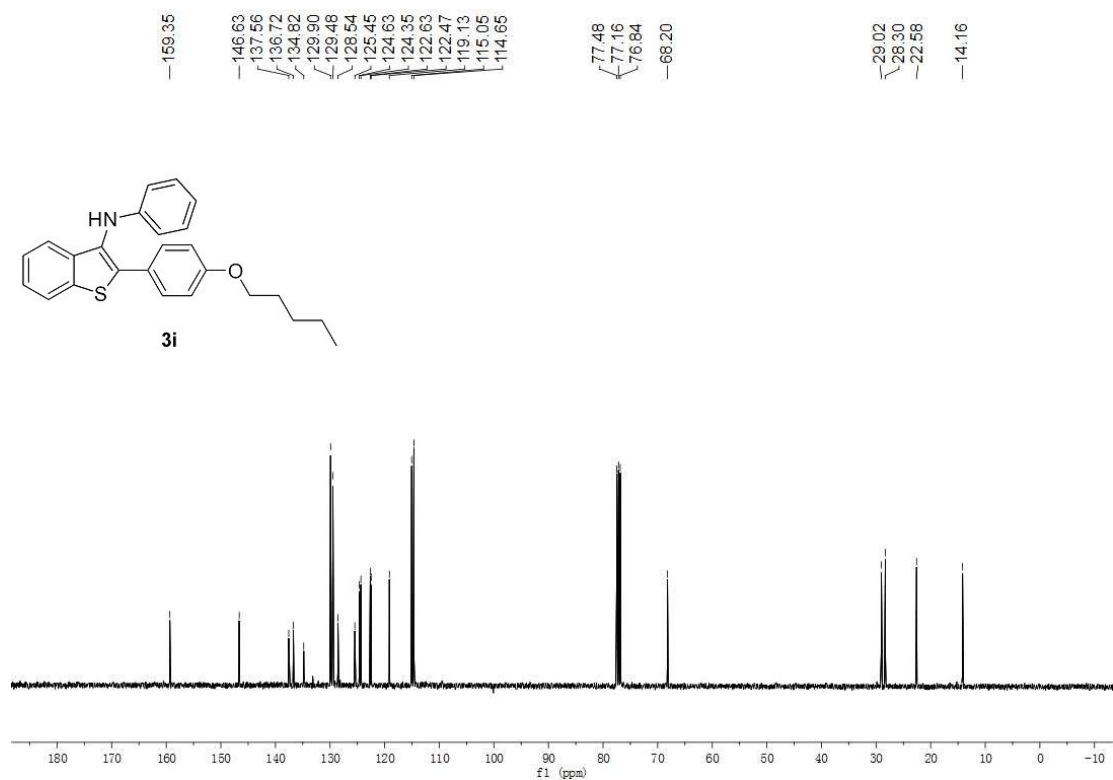

**<sup>13</sup>C NMR spectrum of 3i (100 MHz, CDCl<sub>3</sub>)**

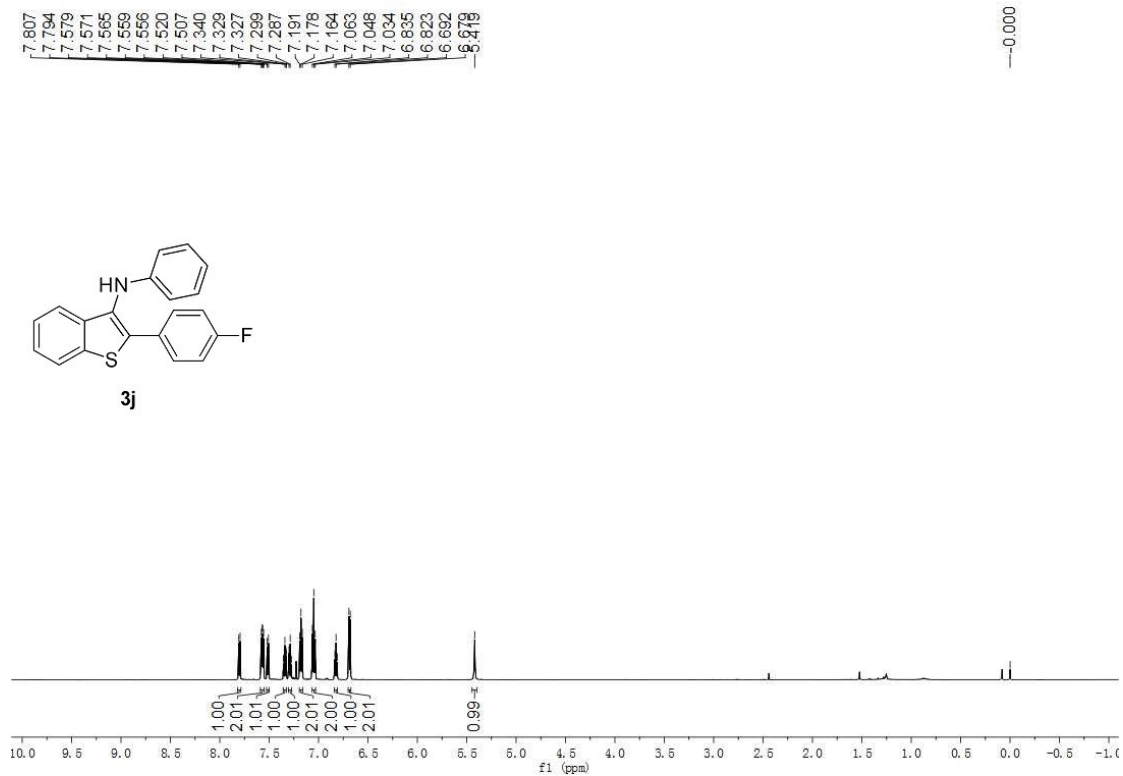

<sup>1</sup>H NMR spectrum of **3j** (600 MHz, CDCl<sub>3</sub>)

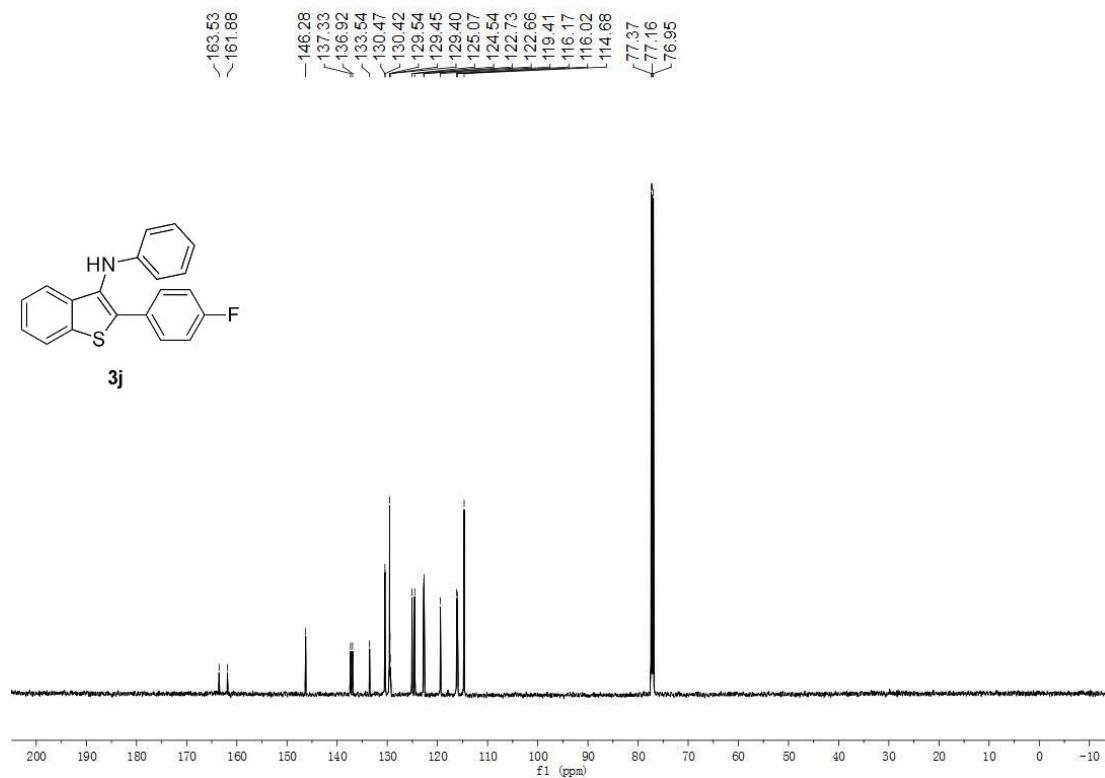

<sup>13</sup>C NMR spectrum of **3j** (150 MHz, CDCl<sub>3</sub>)



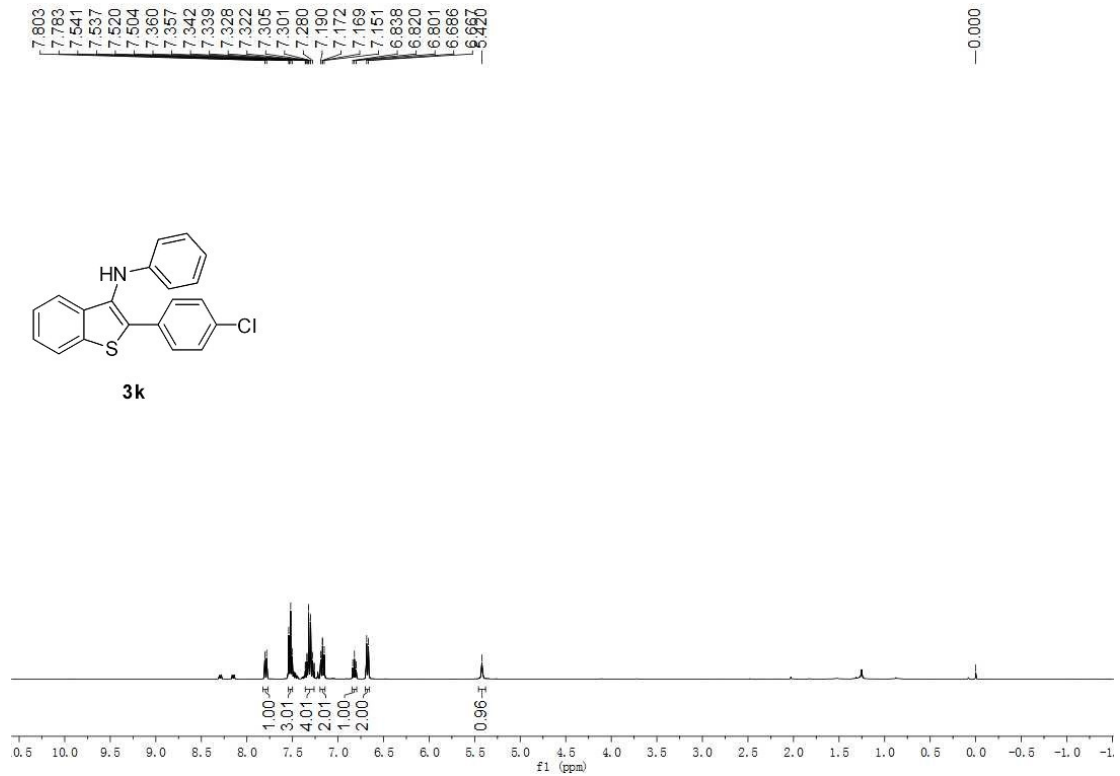

$^1\text{H}$  NMR spectrum of **3k** (400 MHz,  $\text{CDCl}_3$ )

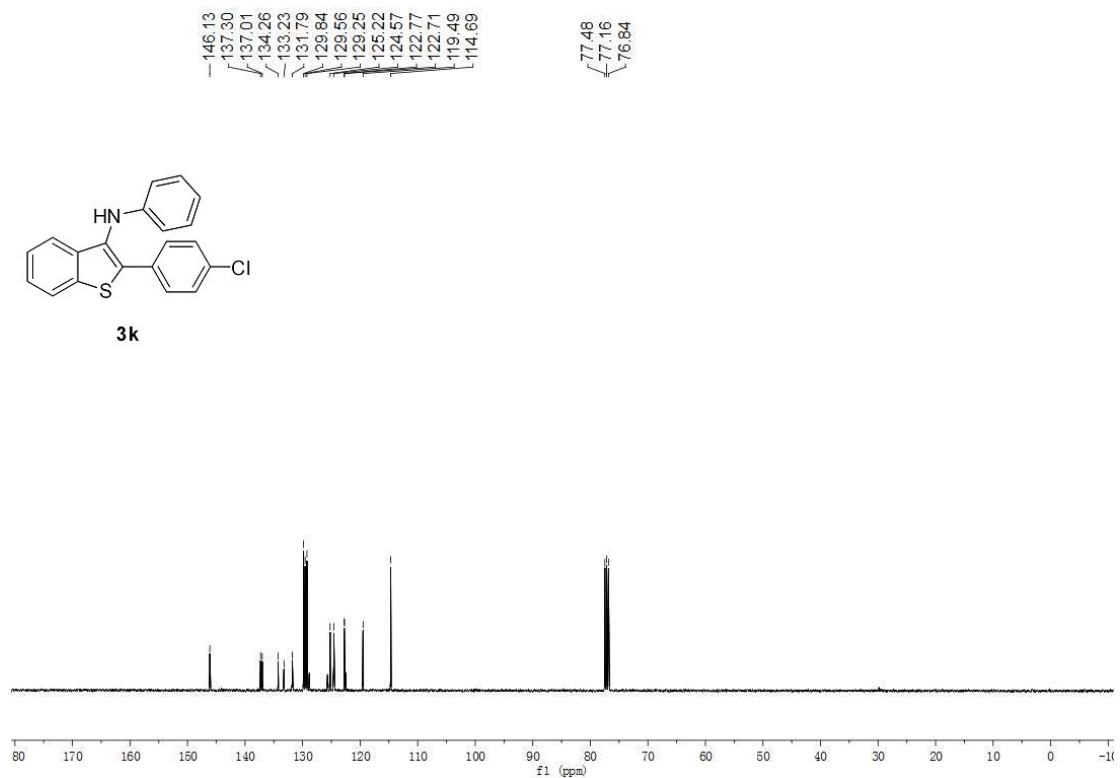

$^{13}\text{C}$  NMR spectrum of **3k** (100 MHz,  $\text{CDCl}_3$ )

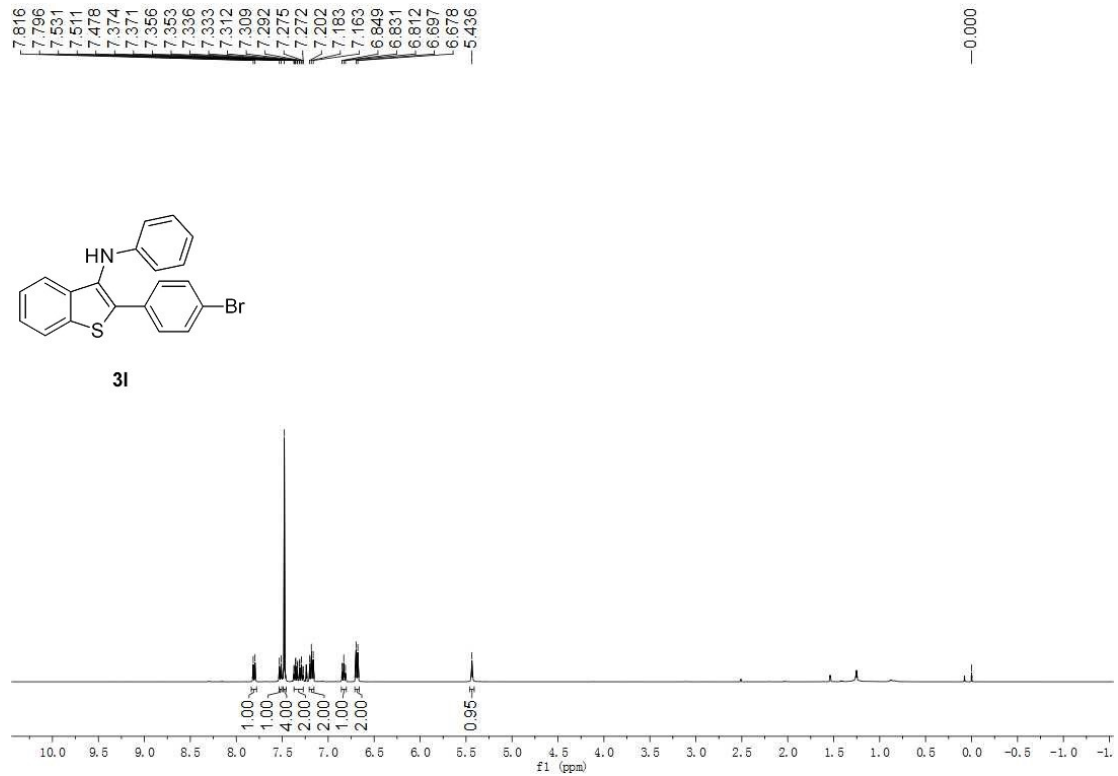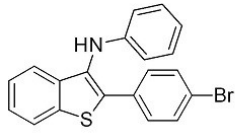

**3I**

<sup>1</sup>H NMR spectrum of **3I** (400 MHz, CDCl<sub>3</sub>)

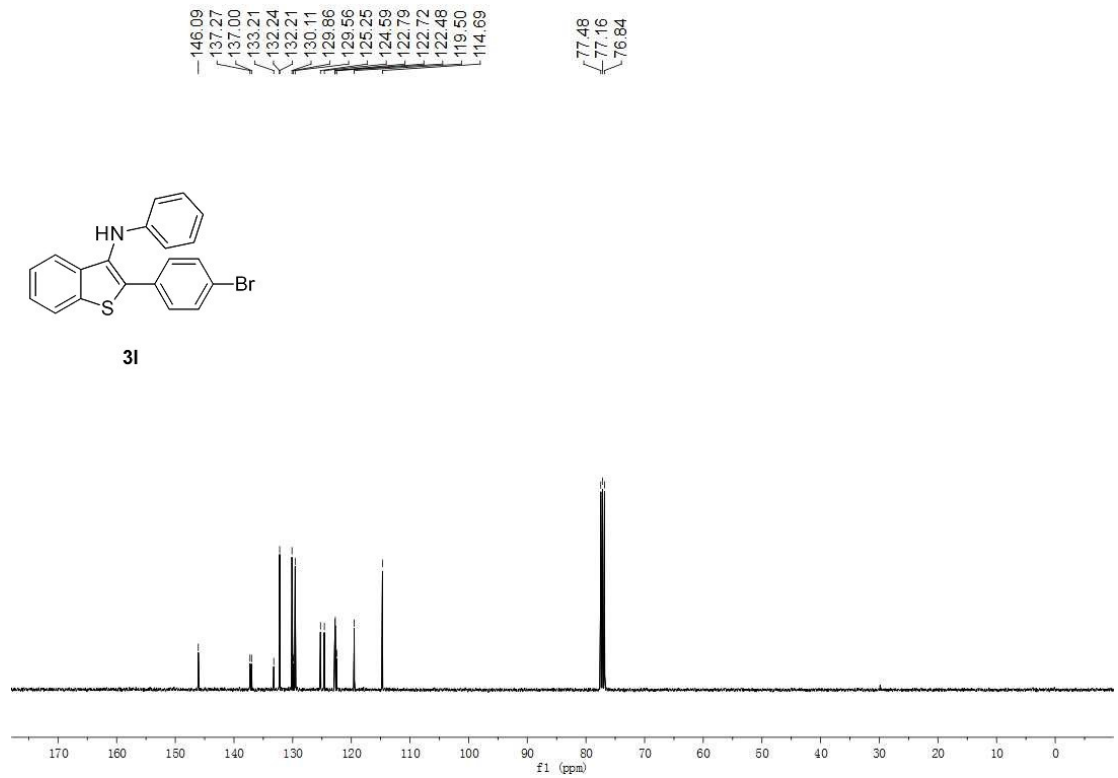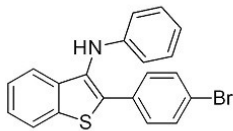

**3I**

<sup>13</sup>C NMR spectrum of **3I** (100 MHz, CDCl<sub>3</sub>)

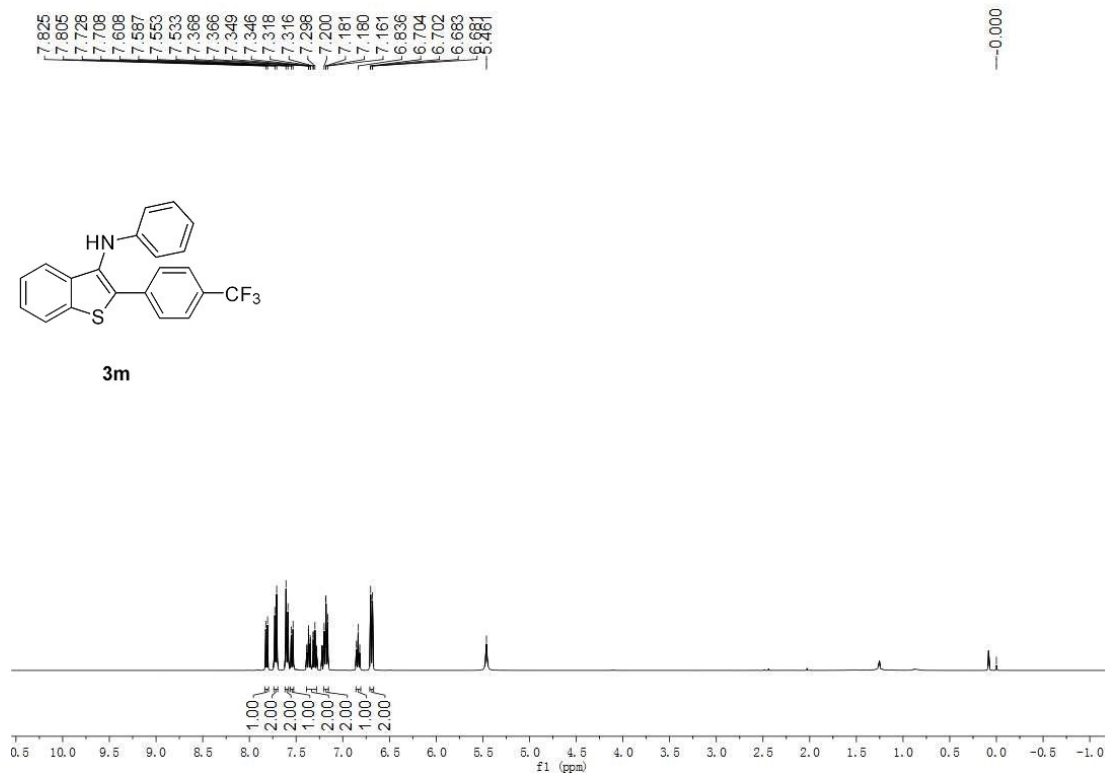

$^1\text{H}$  NMR spectrum of **3m** (400 MHz,  $\text{CDCl}_3$ )

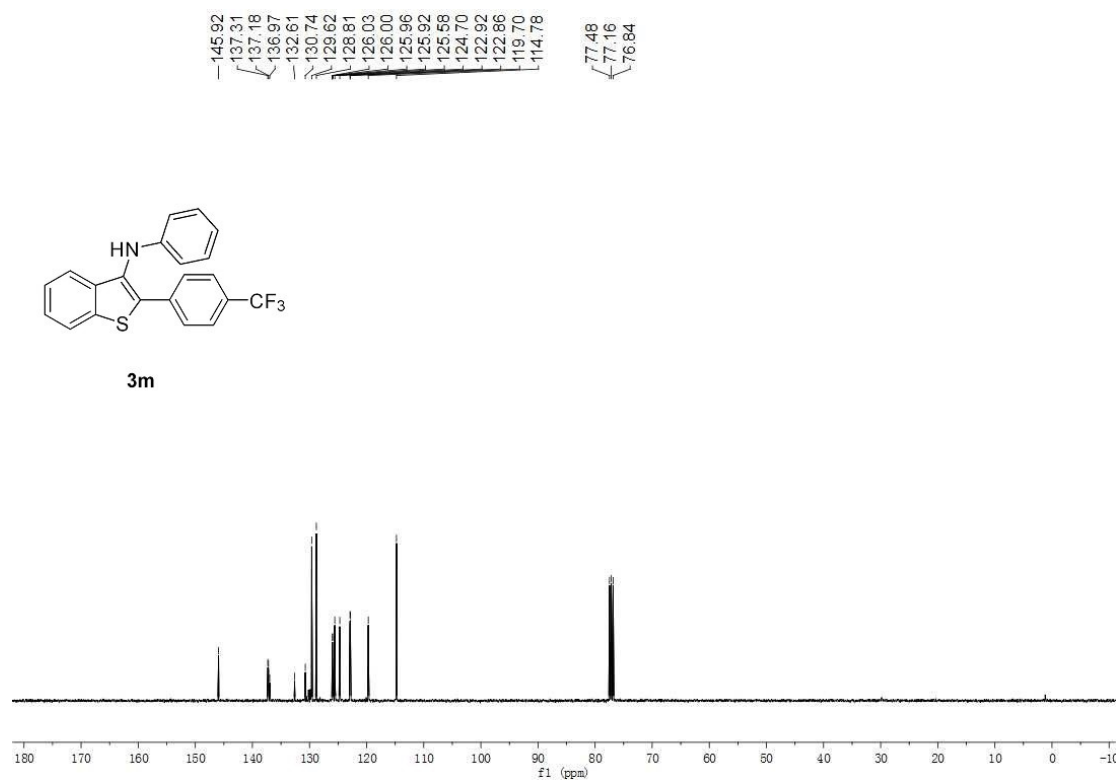

$^{13}\text{C}$  NMR spectrum of **3m** (100 MHz,  $\text{CDCl}_3$ )

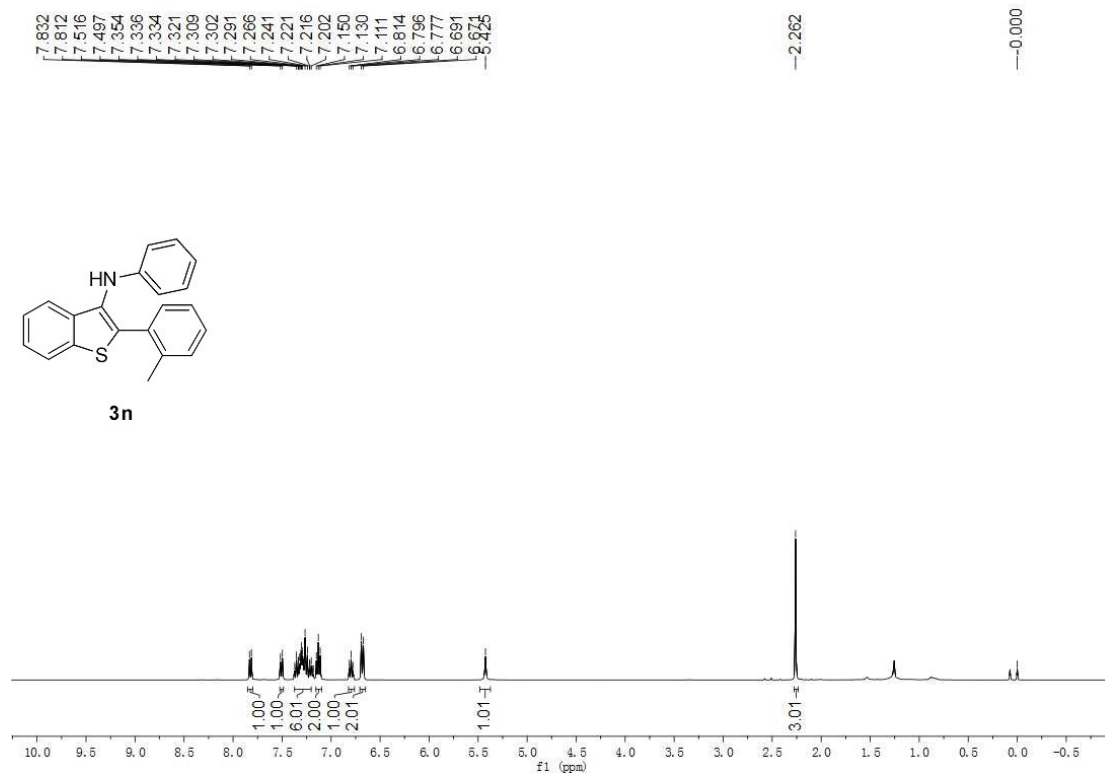

**<sup>1</sup>H NMR spectrum of **3n** (400 MHz, CDCl<sub>3</sub>)**

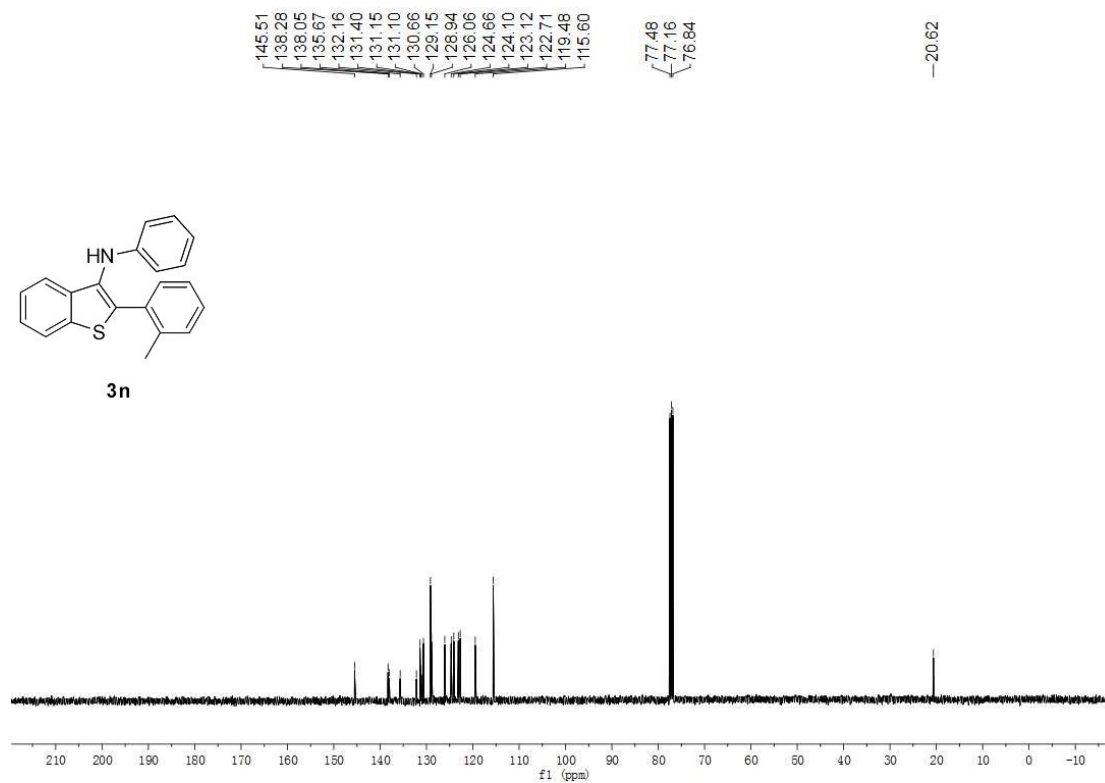

**<sup>13</sup>C NMR spectrum of **3n** (100 MHz, CDCl<sub>3</sub>)**

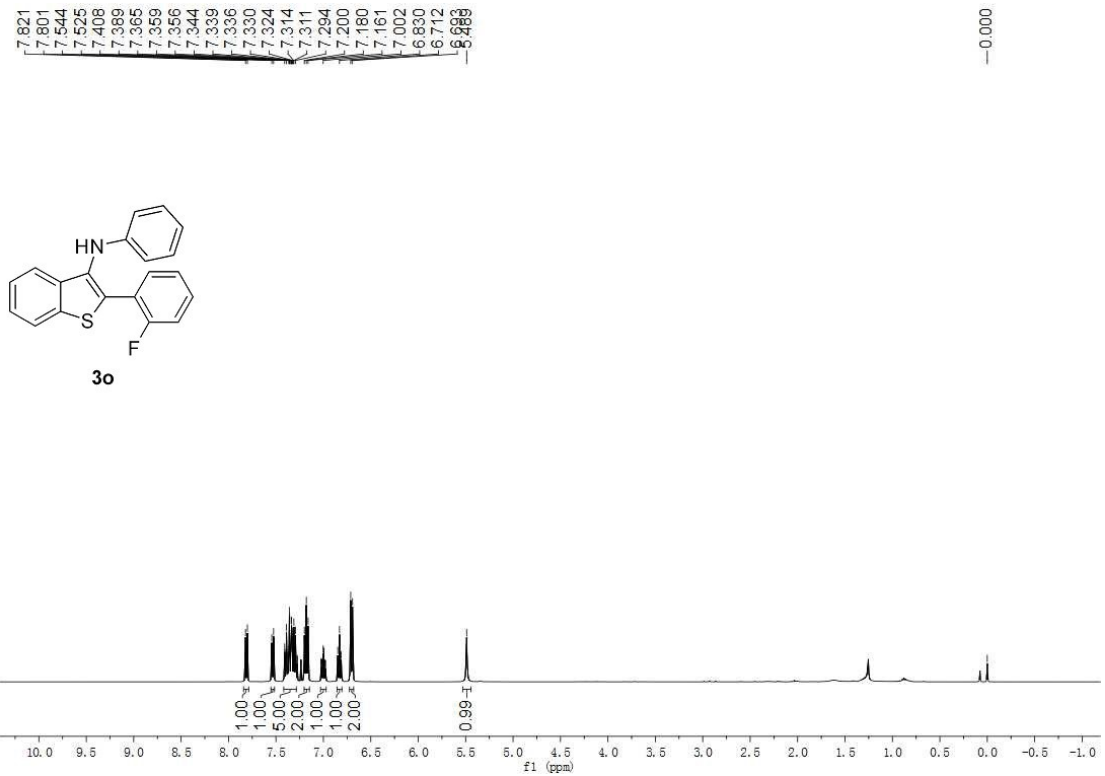

$^1\text{H}$  NMR spectrum of **3o** (400 MHz,  $\text{CDCl}_3$ )

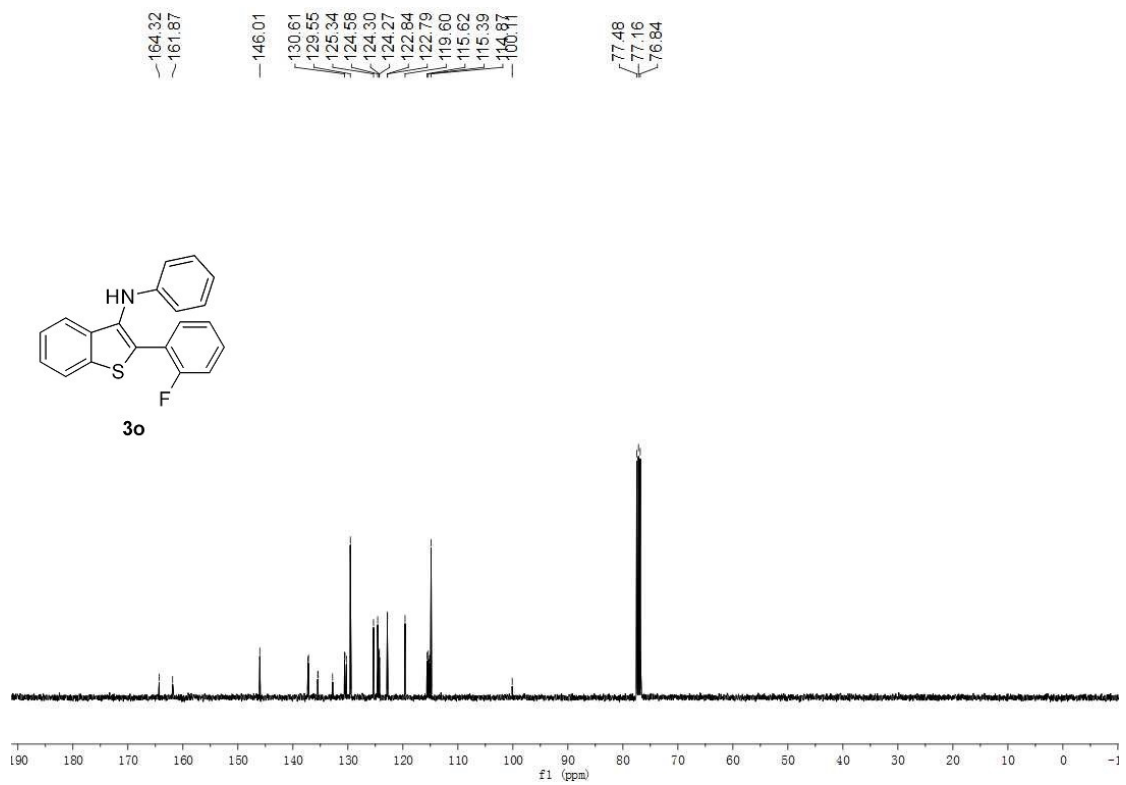

$^{13}\text{C}$  NMR spectrum of **3o** (100 MHz,  $\text{CDCl}_3$ )

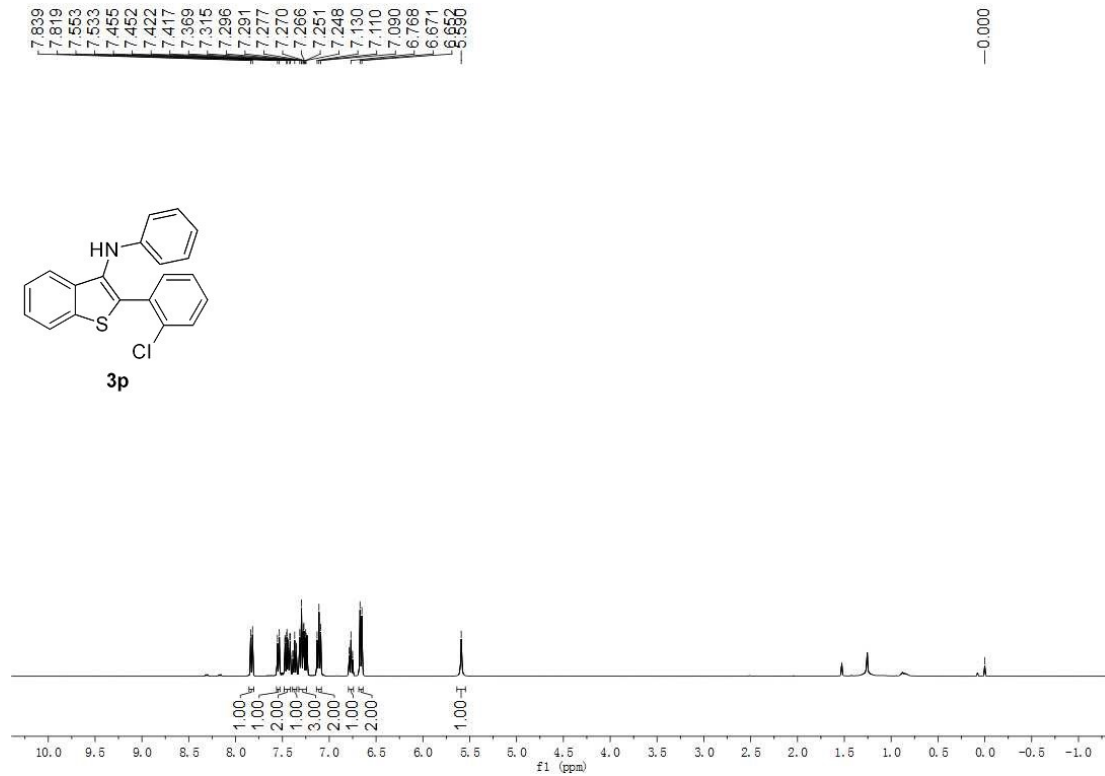

<sup>1</sup>H NMR spectrum of **3p** (400 MHz, CDCl<sub>3</sub>)

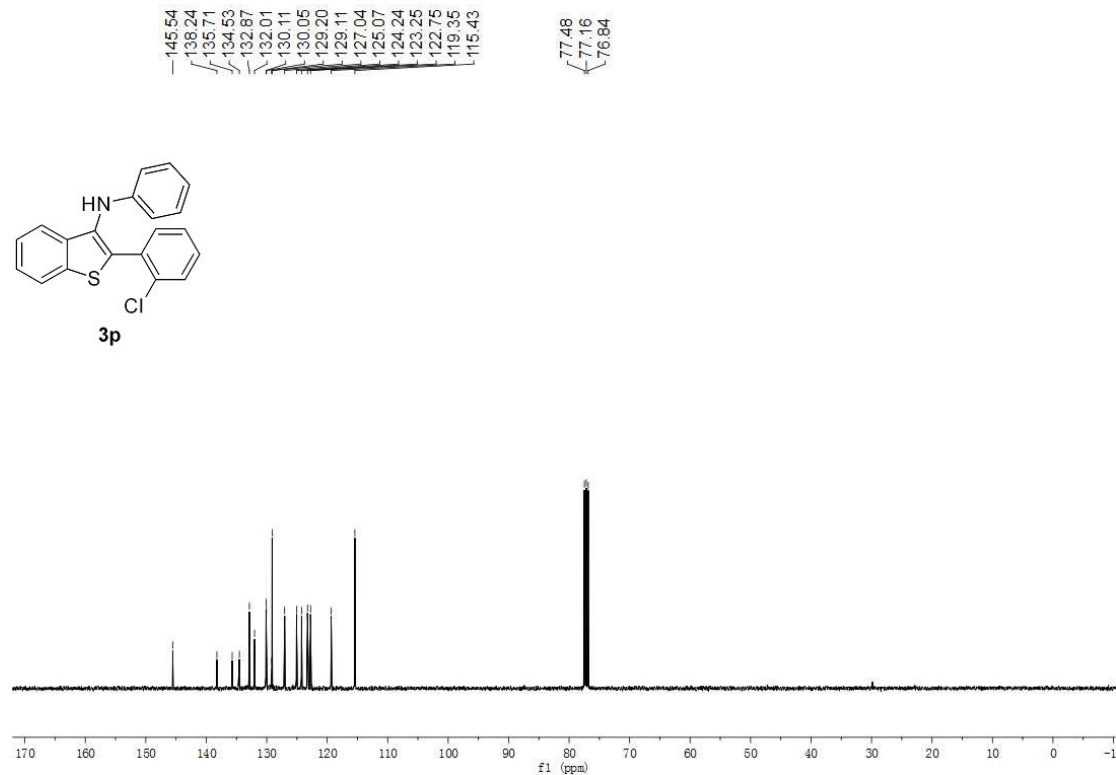

<sup>13</sup>C NMR spectrum of **3p** (100 MHz, CDCl<sub>3</sub>)

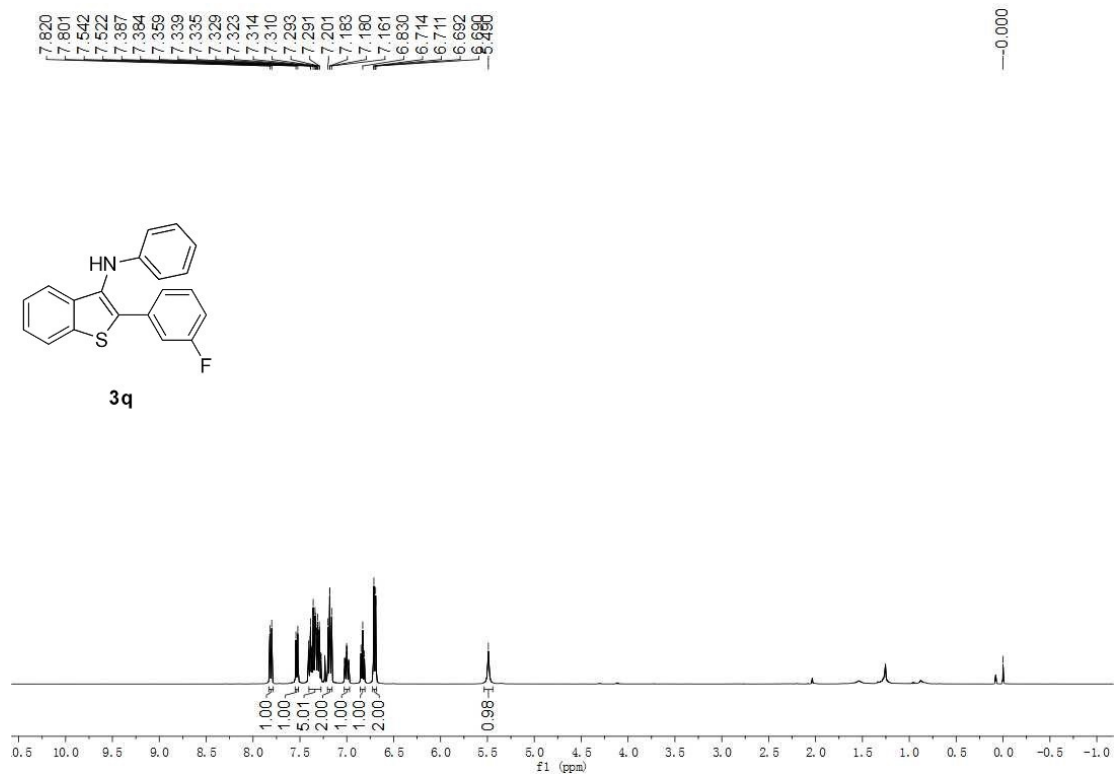

$^1\text{H}$  NMR spectrum of **3q** (400 MHz,  $\text{CDCl}_3$ )

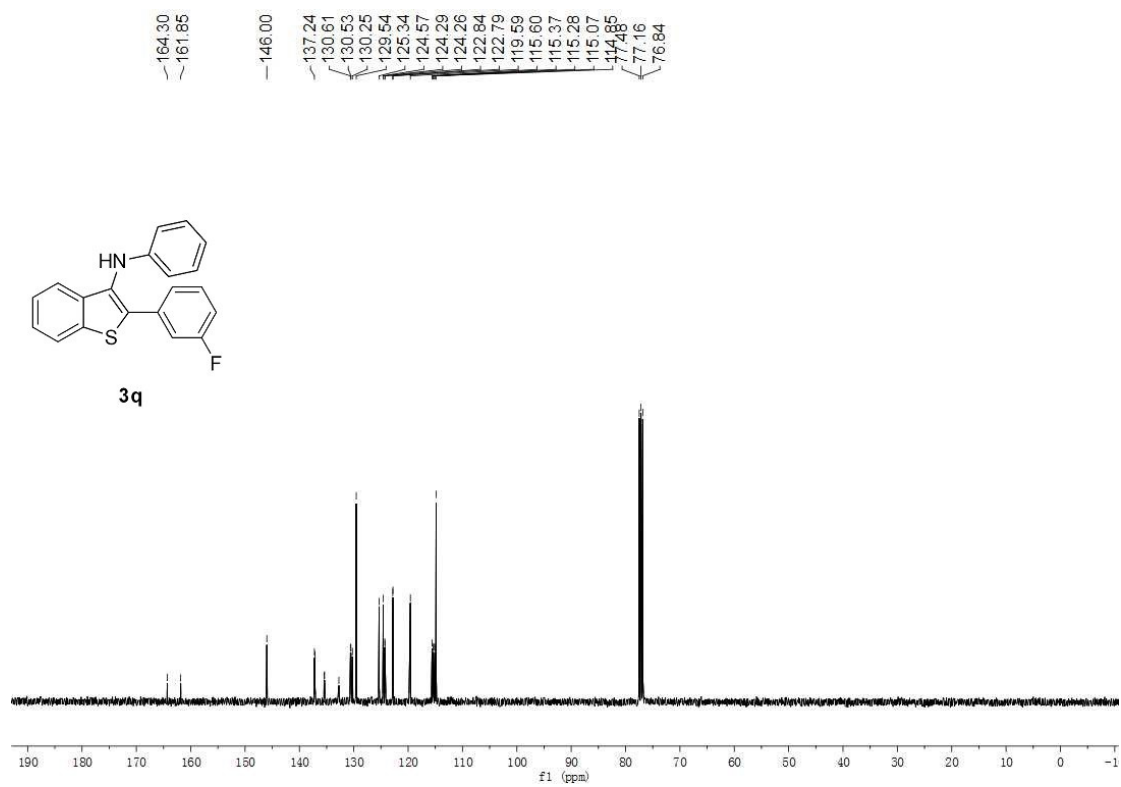

$^{13}\text{C}$  NMR spectrum of **3q** (100 MHz,  $\text{CDCl}_3$ )

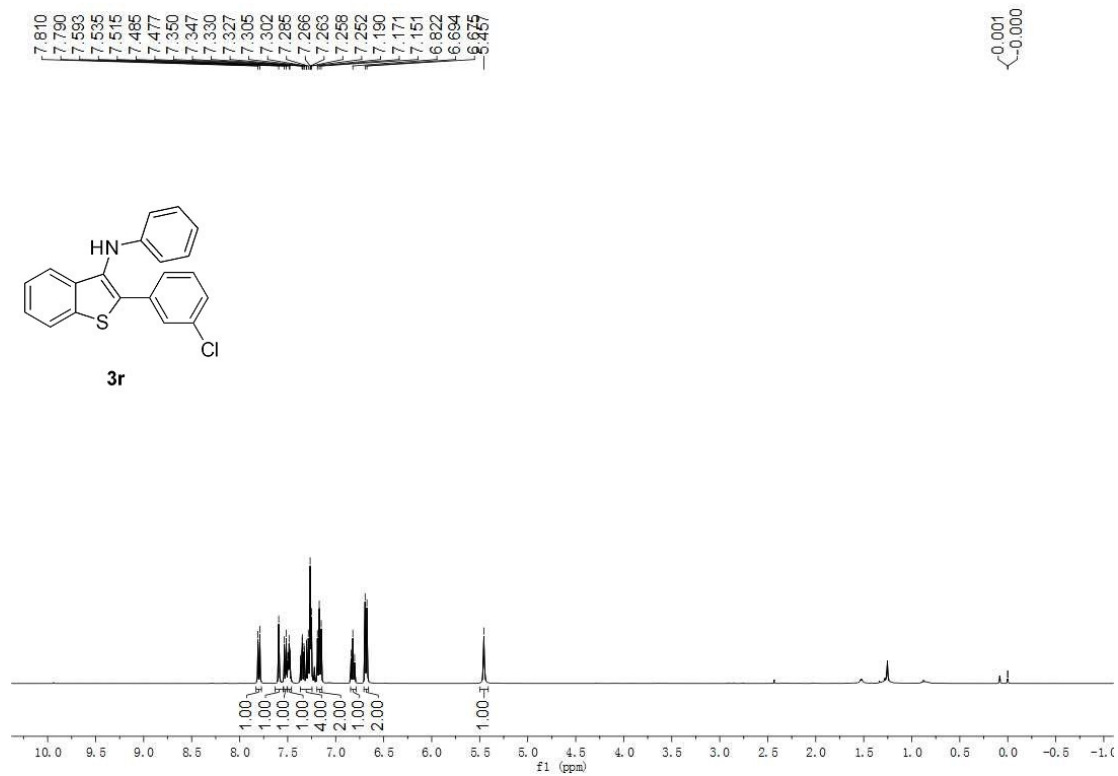

<sup>1</sup>H NMR spectrum of **3r** (400 MHz, CDCl<sub>3</sub>)

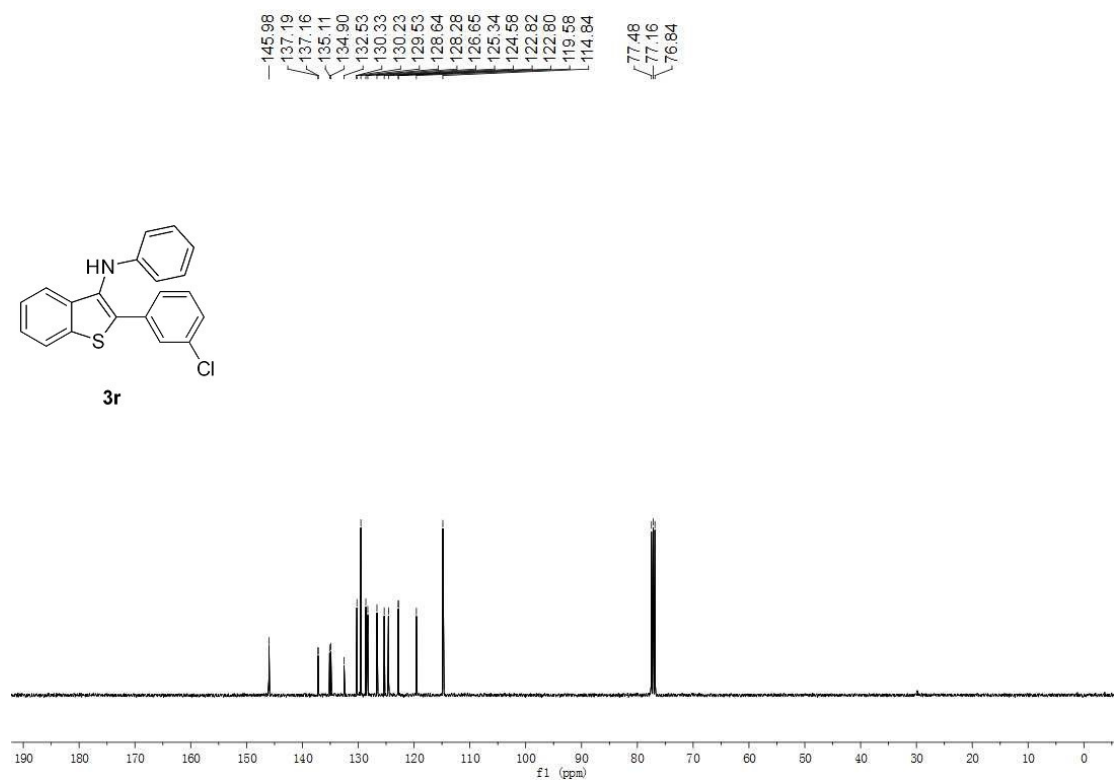

<sup>13</sup>C NMR spectrum of **3r** (100 MHz, CDCl<sub>3</sub>)



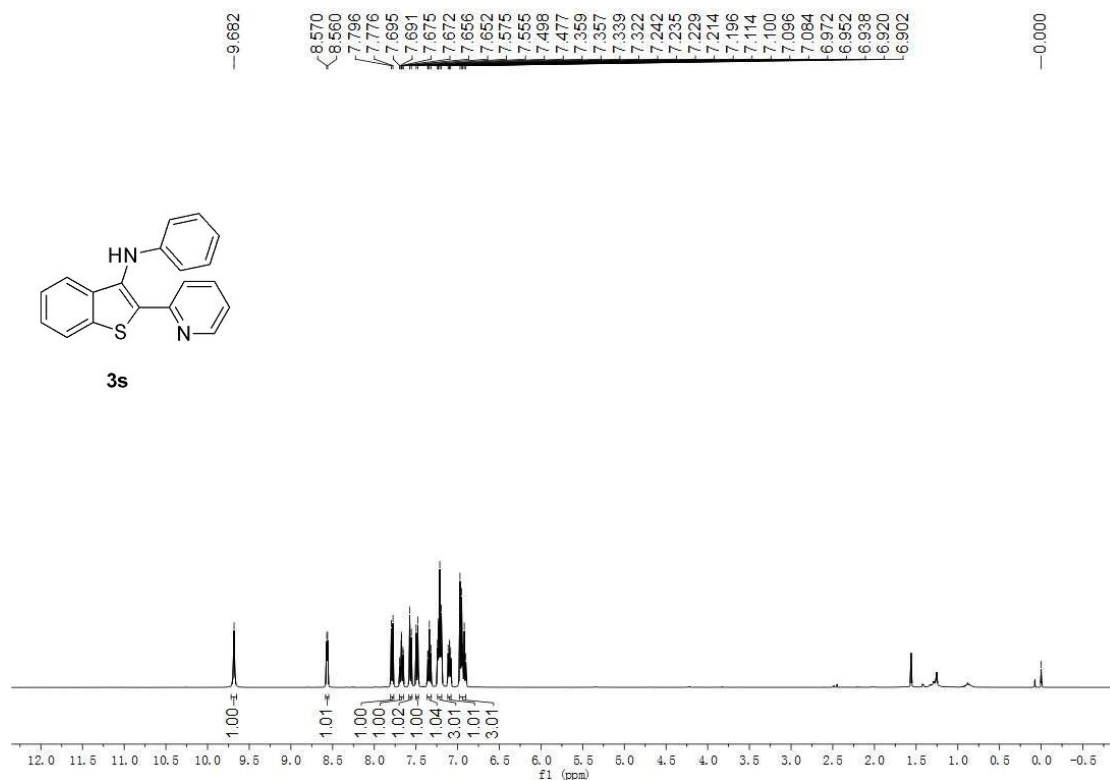

$^1\text{H}$  NMR spectrum of **3s** (400 MHz,  $\text{CDCl}_3$ )

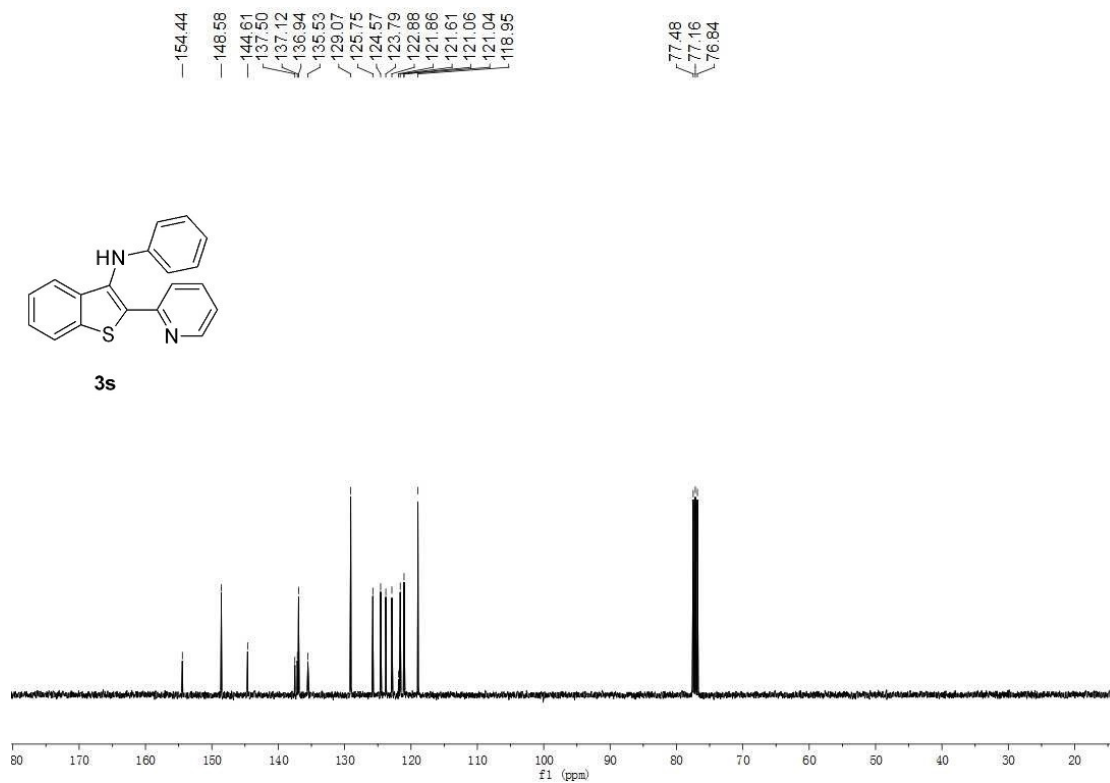

$^{13}\text{C}$  NMR spectrum of **3s** (100 MHz,  $\text{CDCl}_3$ )

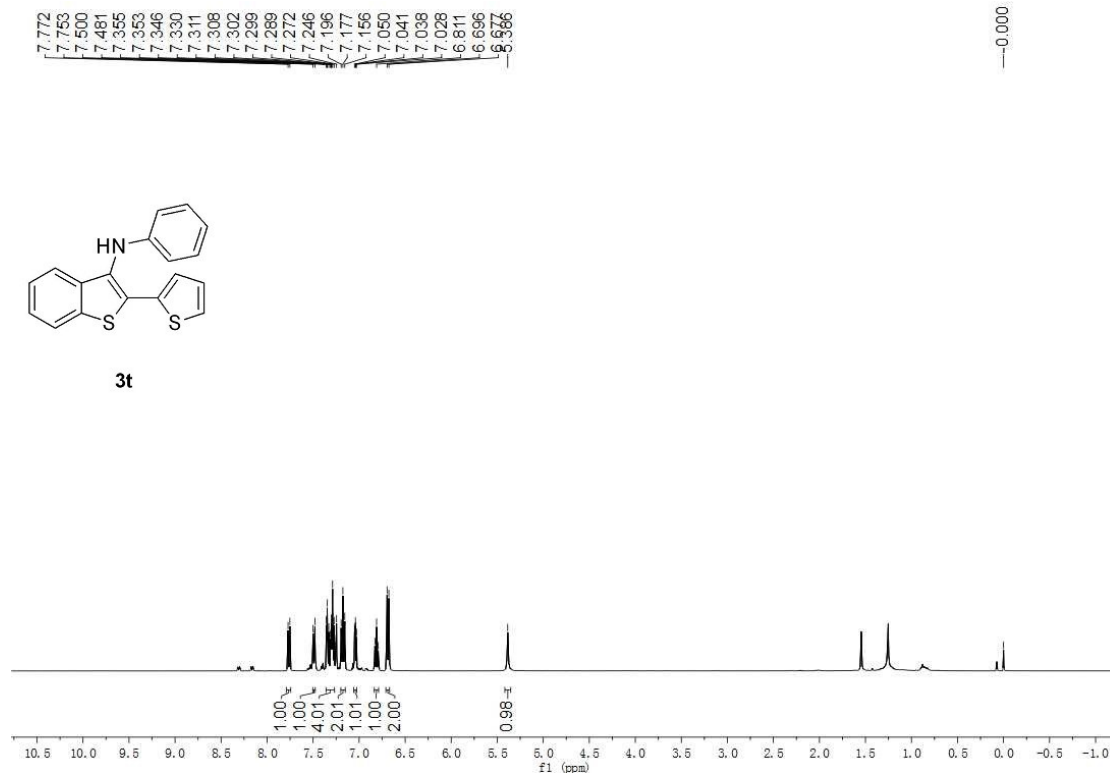

<sup>1</sup>H NMR spectrum of **3t** (400 MHz, CDCl<sub>3</sub>)

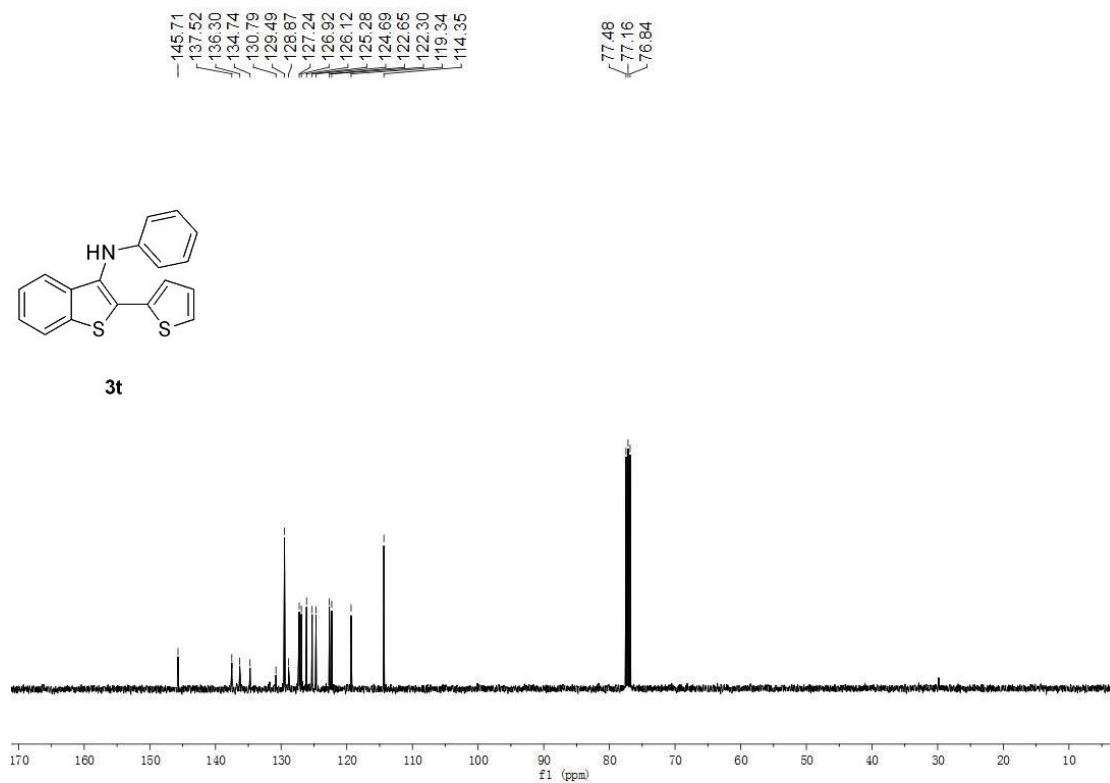

<sup>13</sup>C NMR spectrum of **3t** (100 MHz, CDCl<sub>3</sub>)

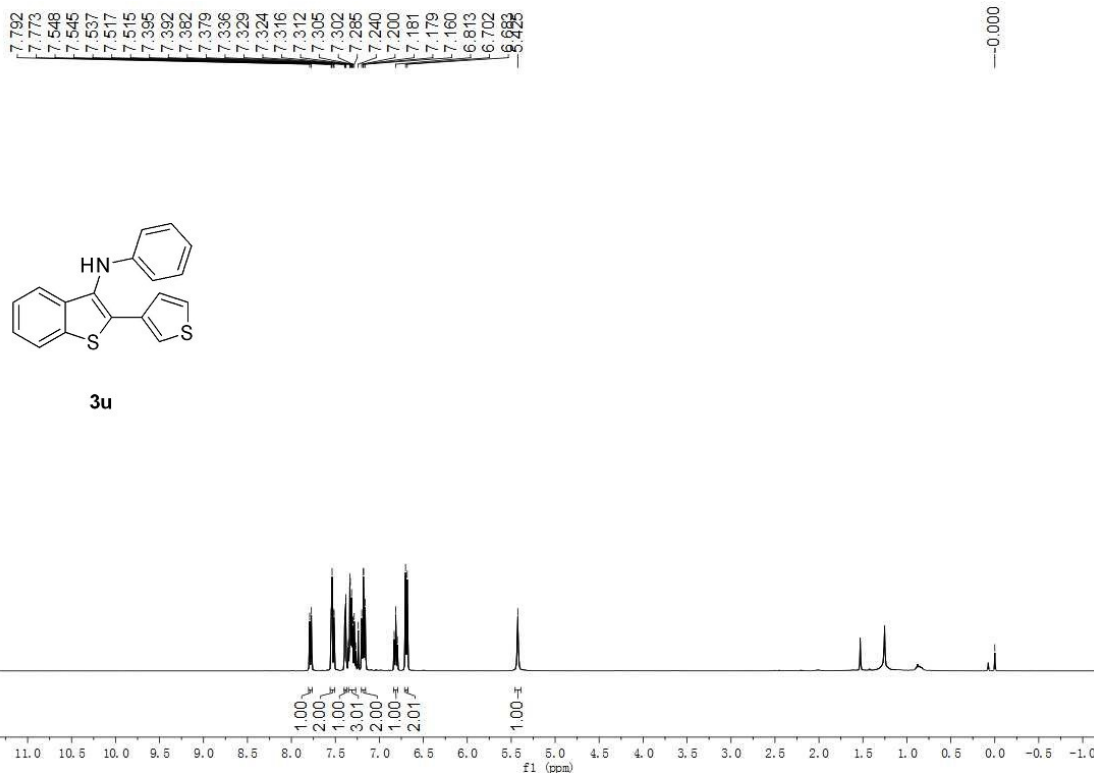

<sup>1</sup>H NMR spectrum of **3u** (400 MHz, CDCl<sub>3</sub>)

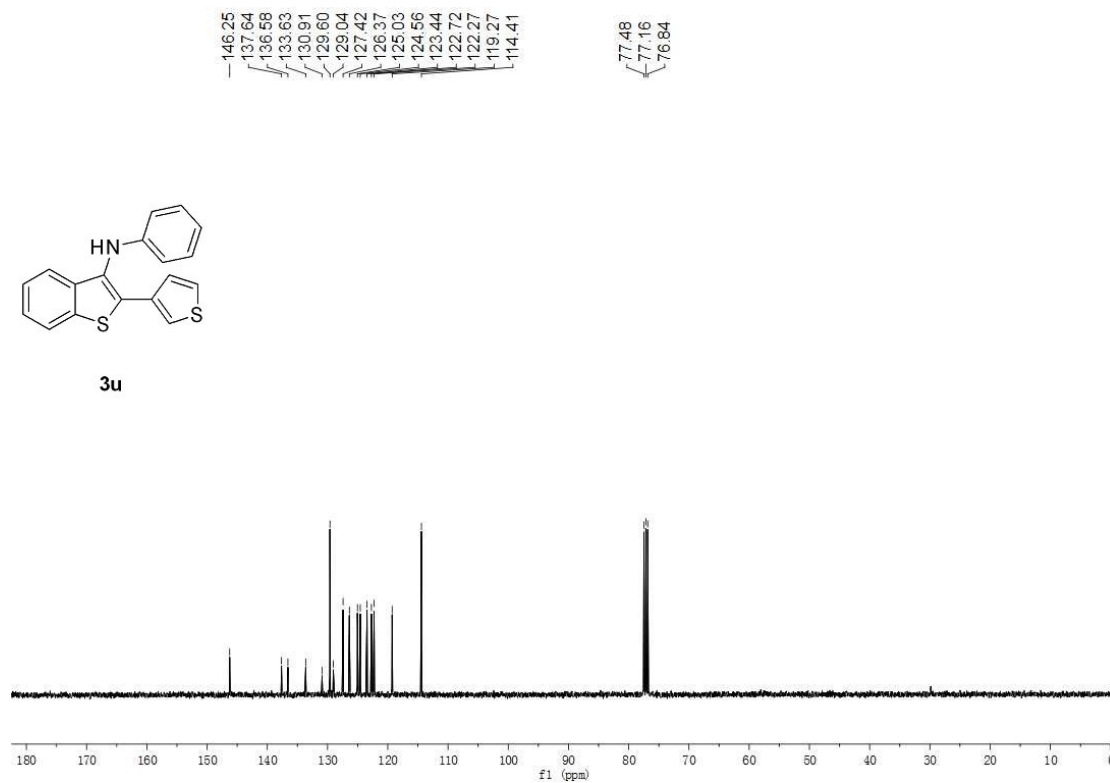

<sup>13</sup>C NMR spectrum of **3u** (100 MHz, CDCl<sub>3</sub>)

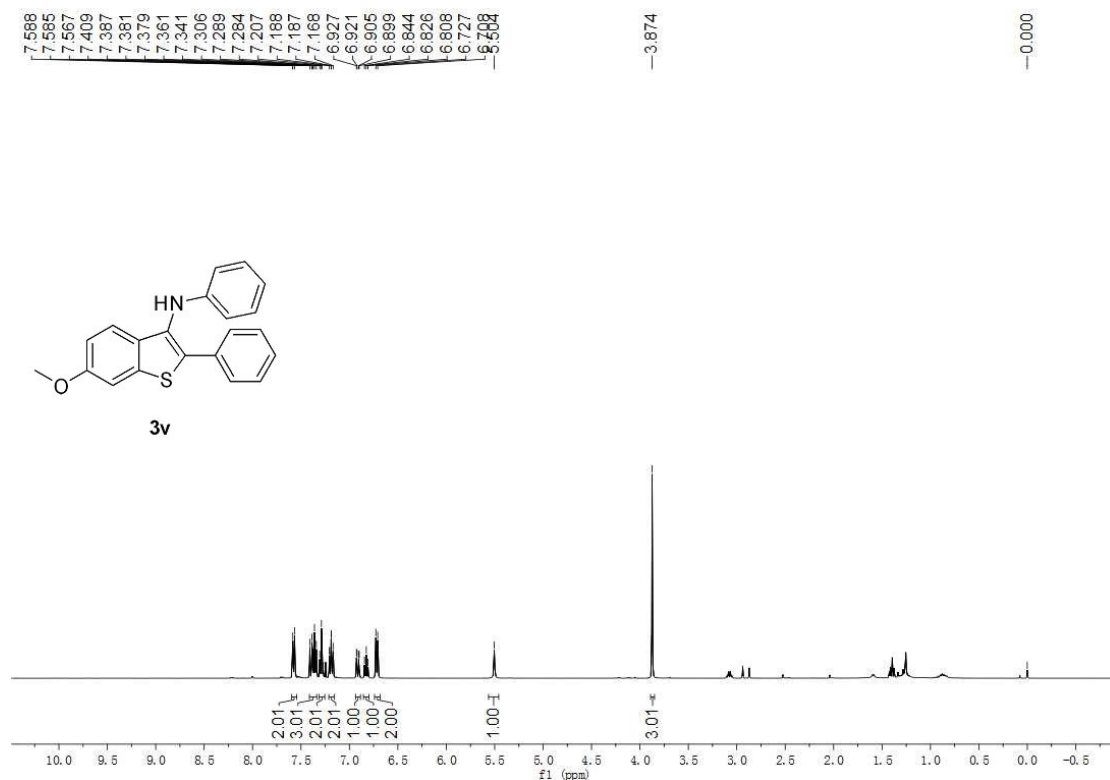

<sup>1</sup>H NMR spectrum of **3v** (400 MHz, CDCl<sub>3</sub>)

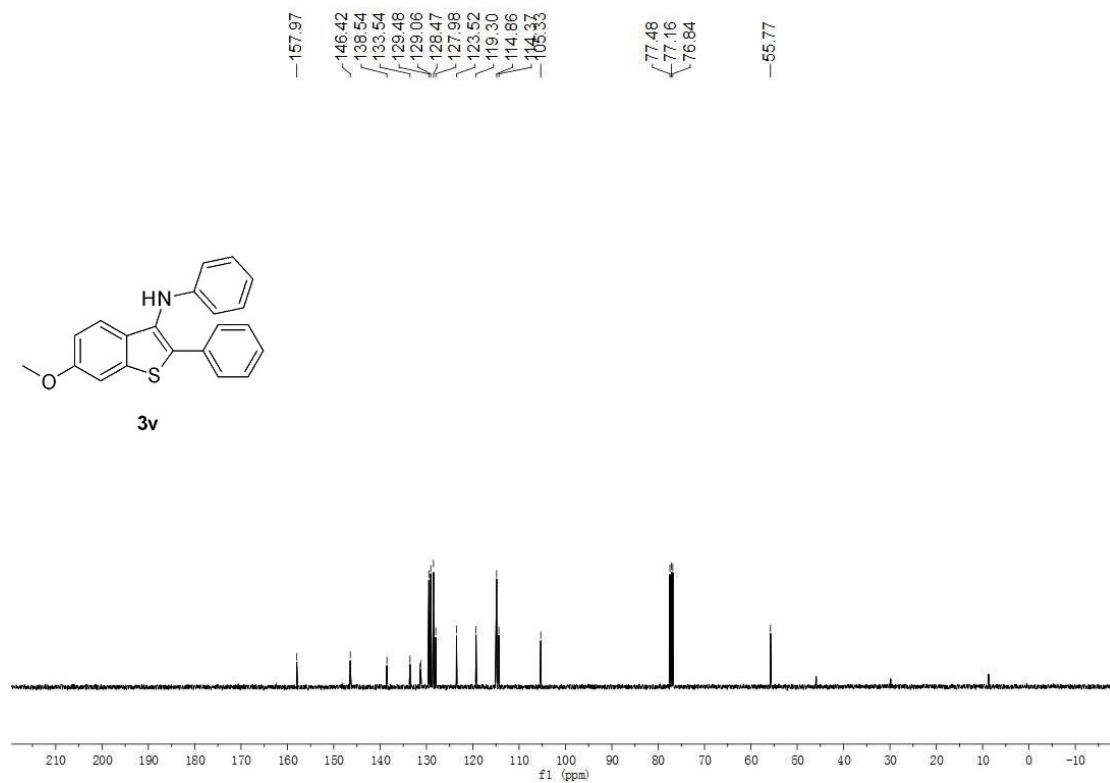

<sup>13</sup>C NMR spectrum of **3v** (100 MHz, CDCl<sub>3</sub>)

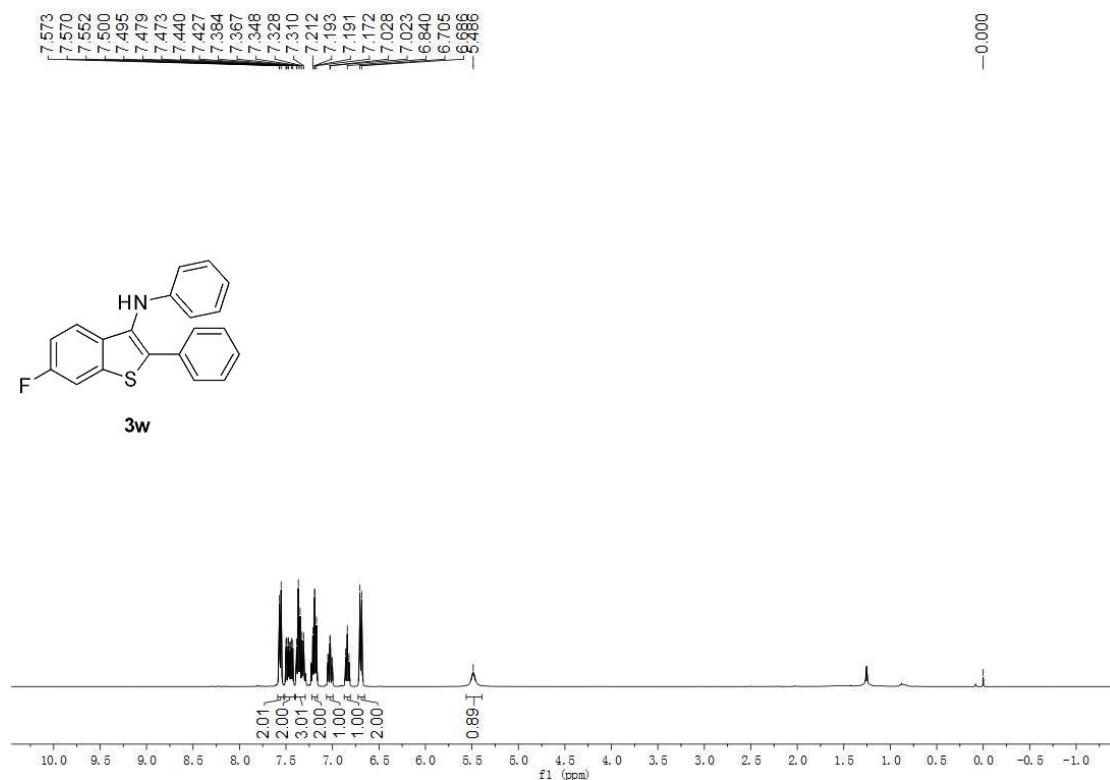

$^1\text{H}$  NMR spectrum of **3w** (400 MHz,  $\text{CDCl}_3$ )

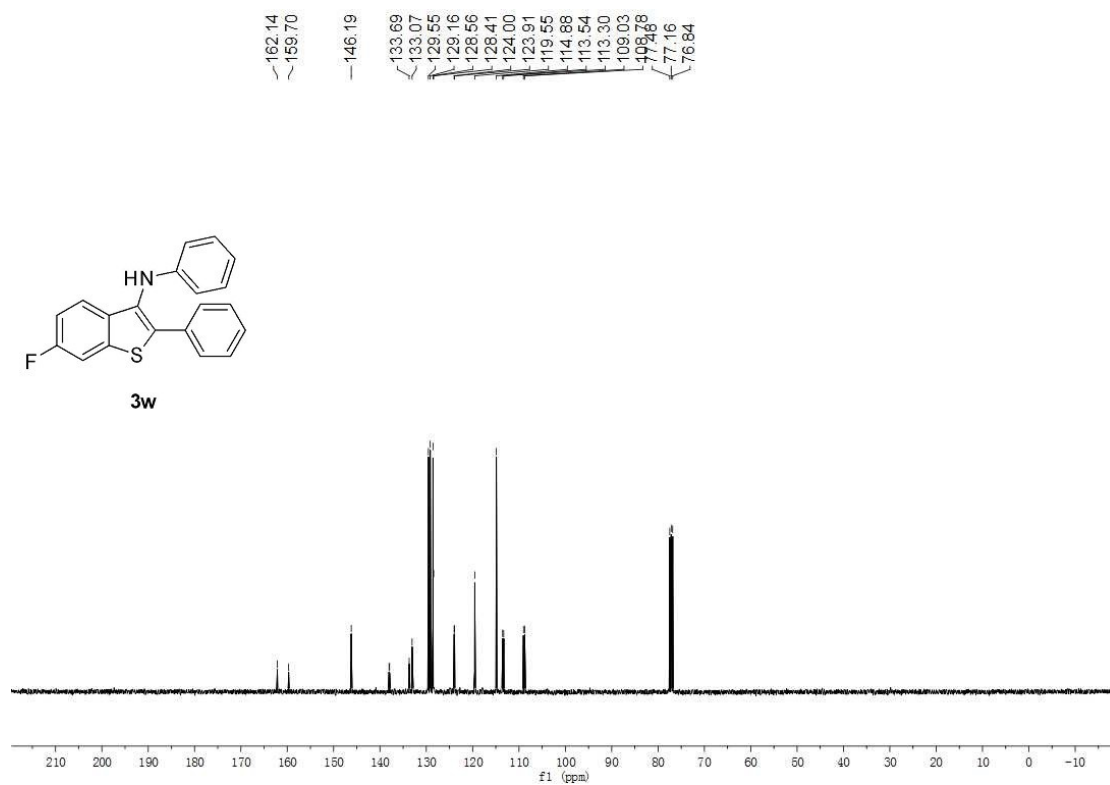

$^{13}\text{C}$  NMR spectrum of **3w** (100 MHz,  $\text{CDCl}_3$ )

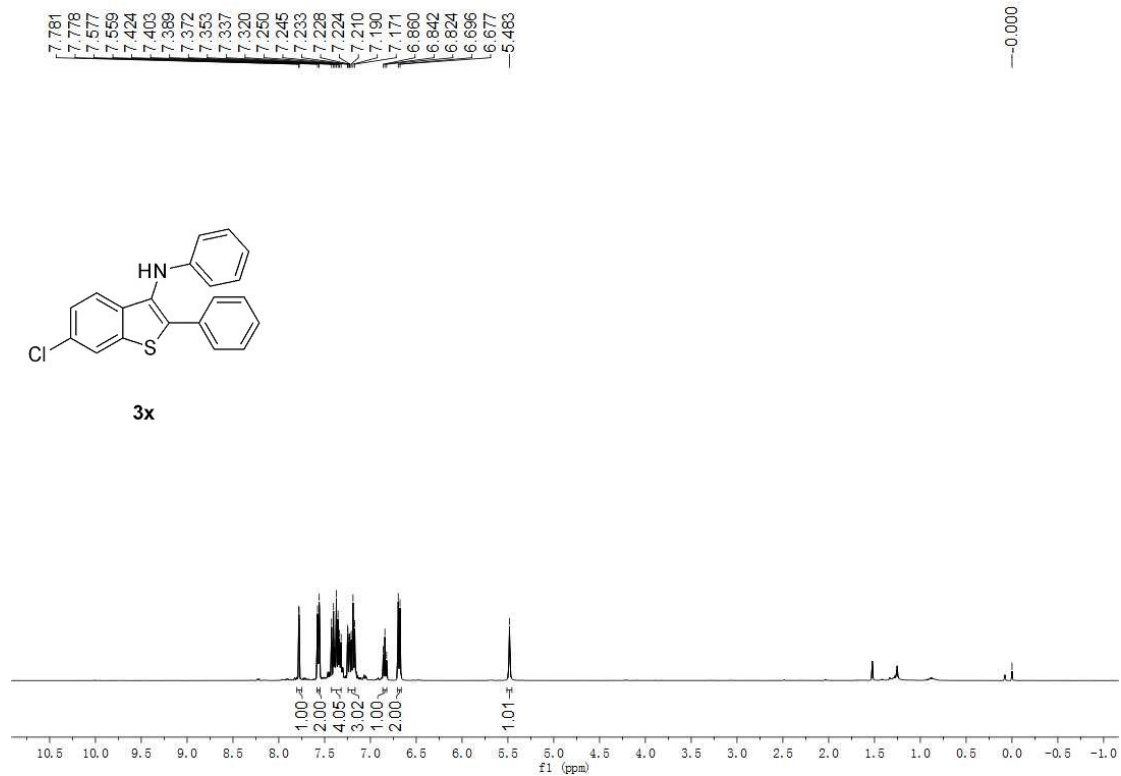

$^1\text{H}$  NMR spectrum of **3x** (400 MHz,  $\text{CDCl}_3$ )

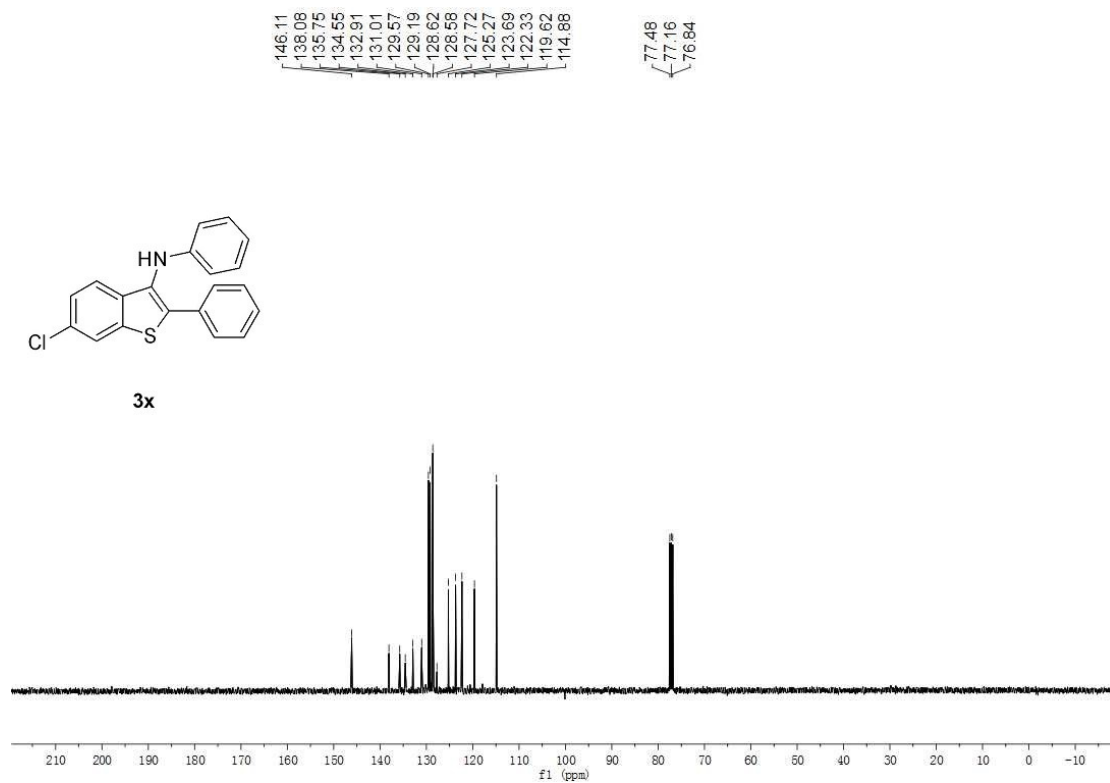

$^{13}\text{C}$  NMR spectrum of **3x** (100 MHz,  $\text{CDCl}_3$ )

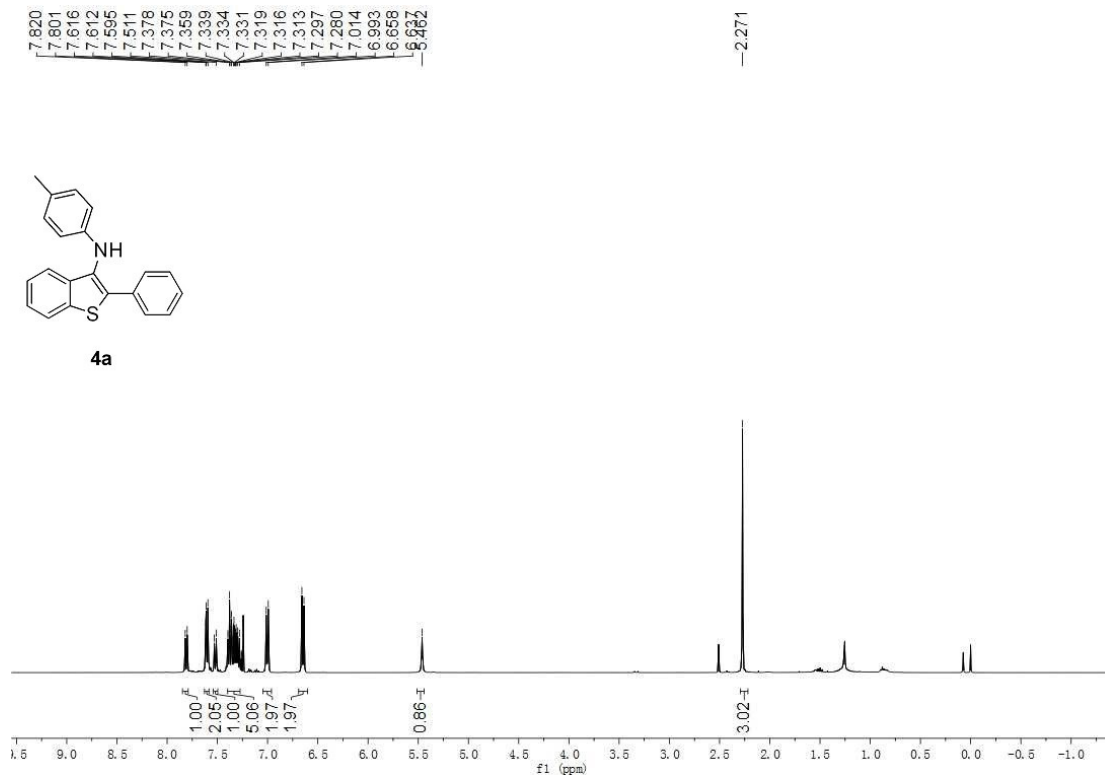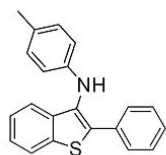

4a

<sup>1</sup>H NMR spectrum of 4a (400 MHz, CDCl<sub>3</sub>)

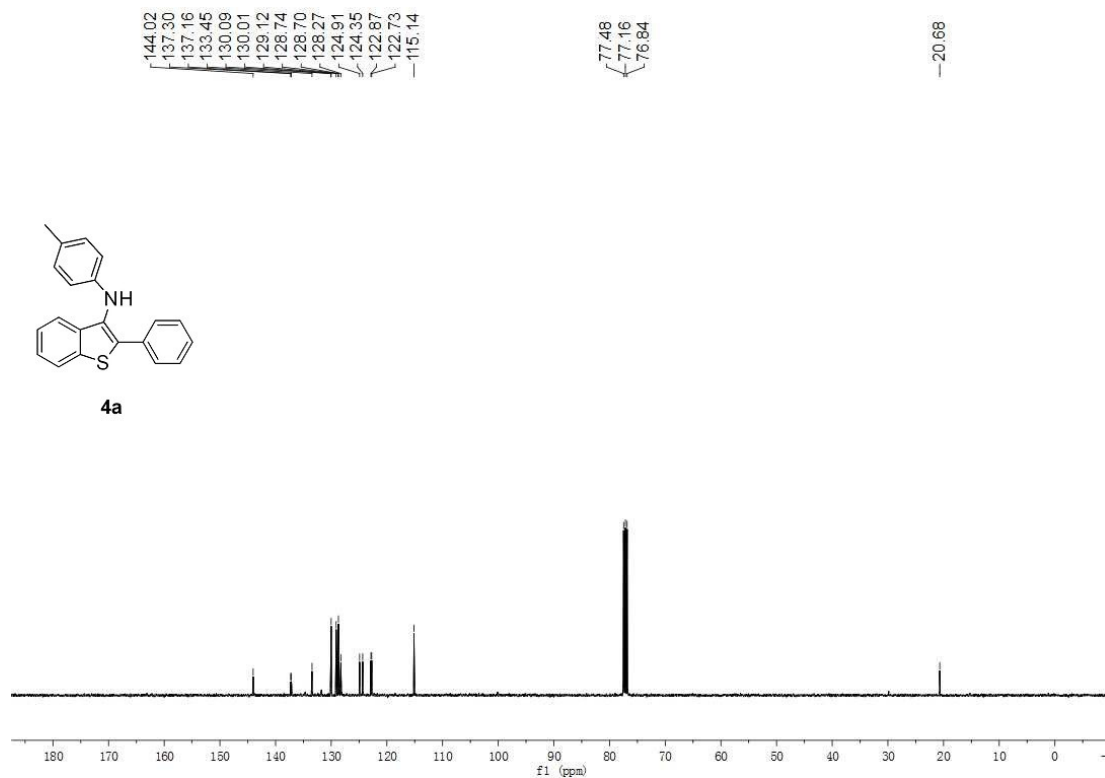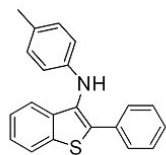

4a

<sup>13</sup>C NMR spectrum of 4a (100 MHz, CDCl<sub>3</sub>)

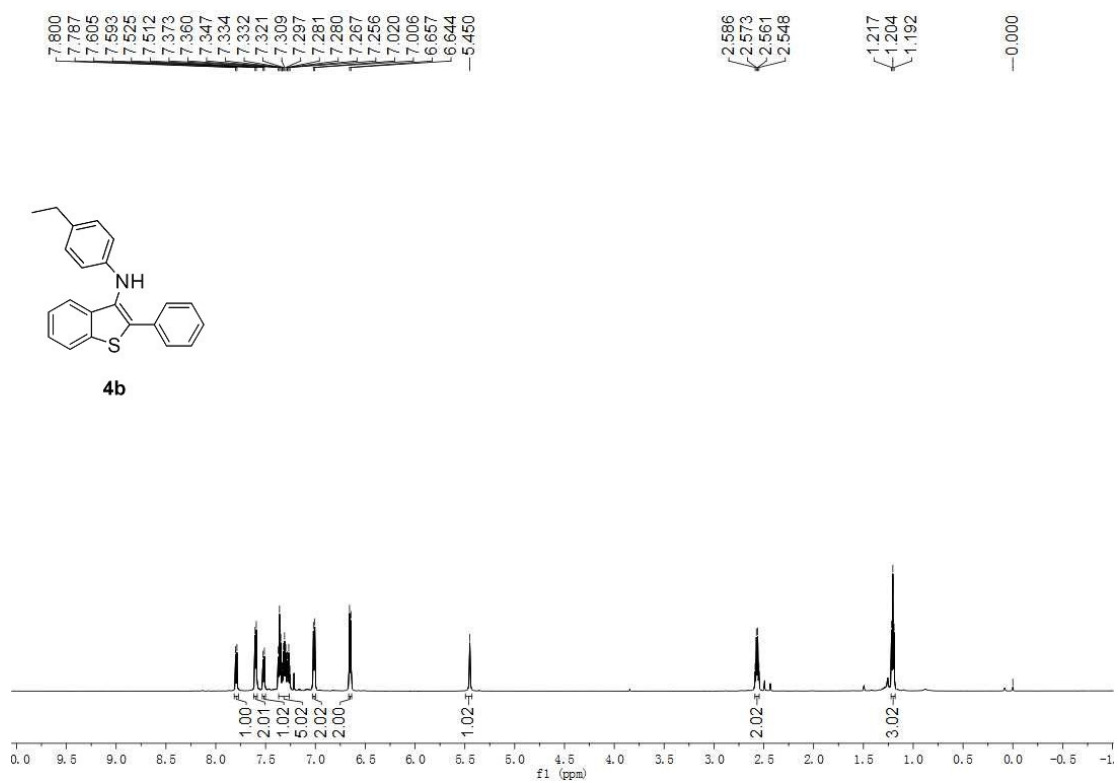

**4b**

<sup>1</sup>H NMR spectrum of **4b** (600 MHz, CDCl<sub>3</sub>)

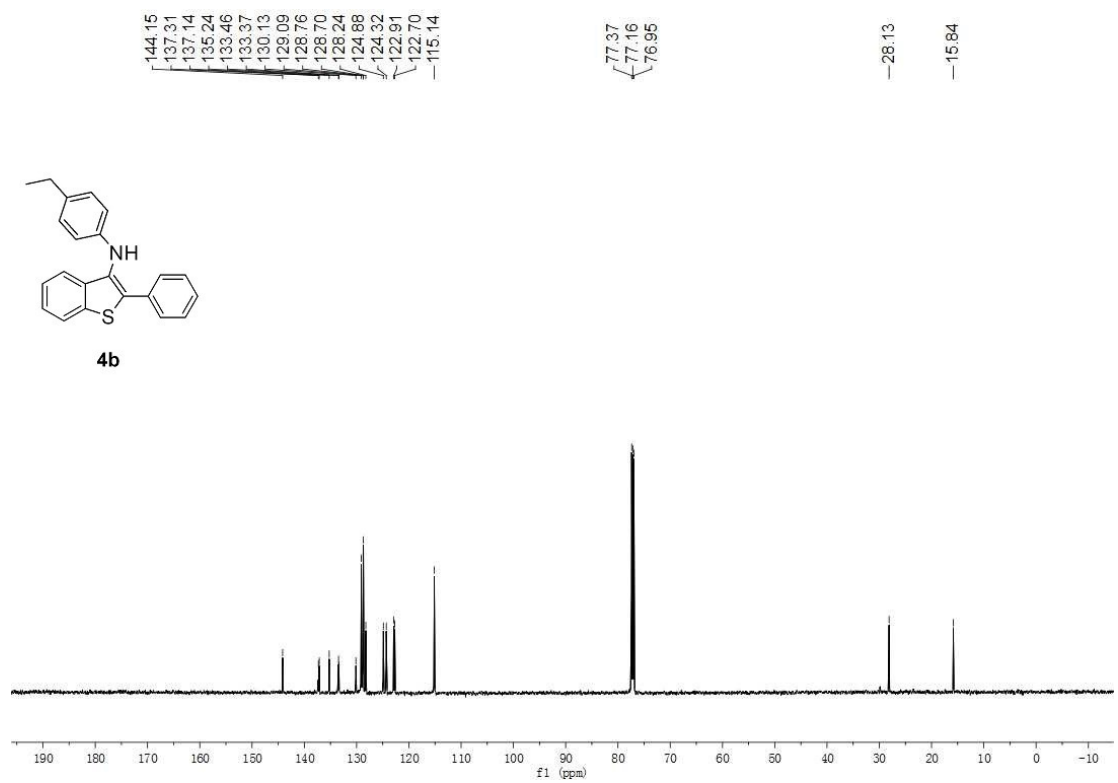

**4b**

<sup>13</sup>C NMR spectrum of **4b** (150 MHz, CDCl<sub>3</sub>)



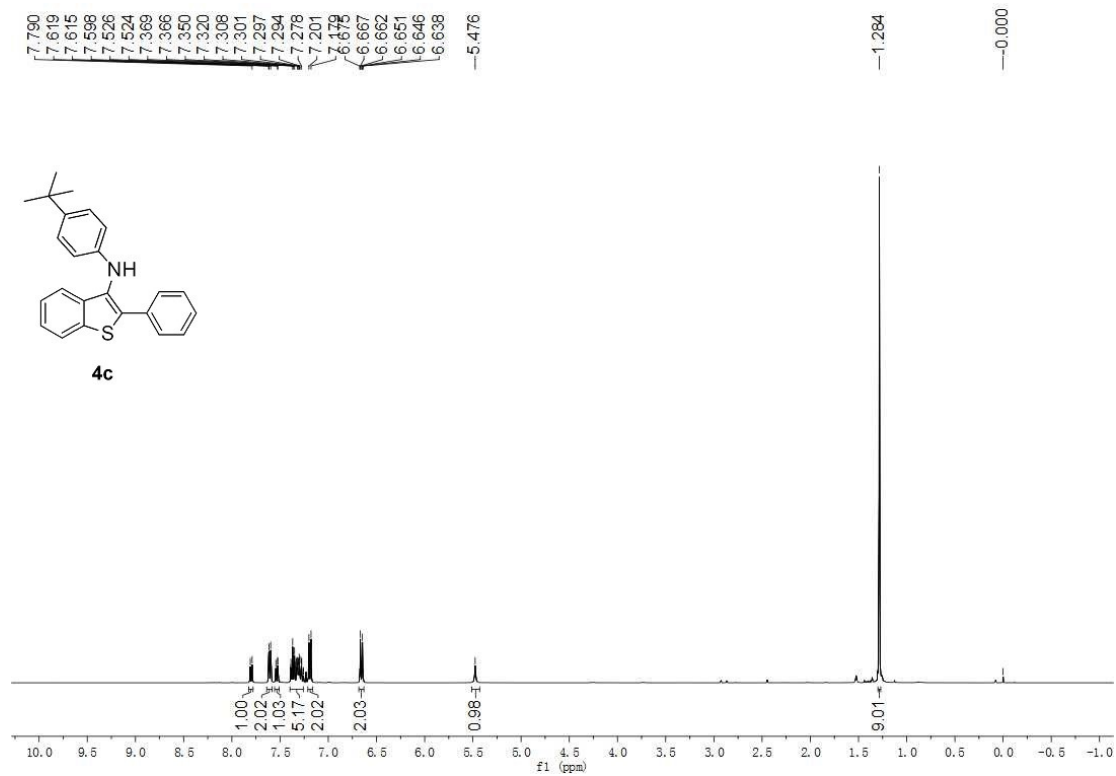

<sup>1</sup>H NMR spectrum of **4c** (400 MHz, CDCl<sub>3</sub>)

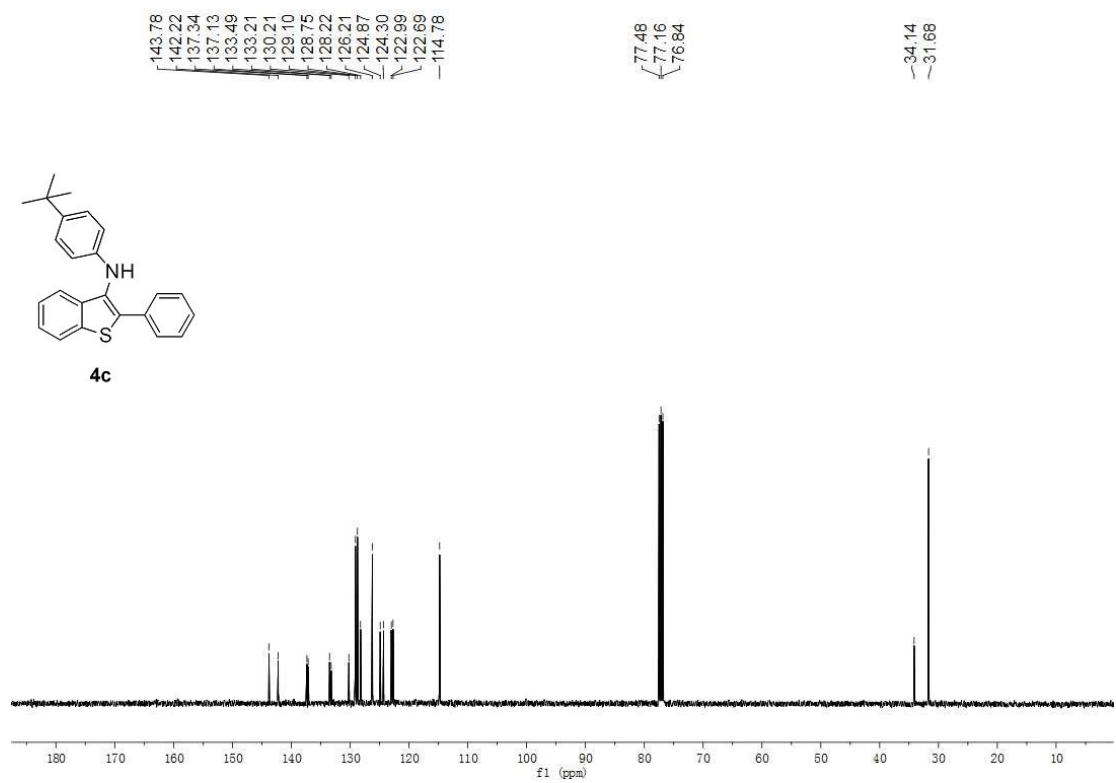

<sup>13</sup>C NMR spectrum of **4c** (100 MHz, CDCl<sub>3</sub>)

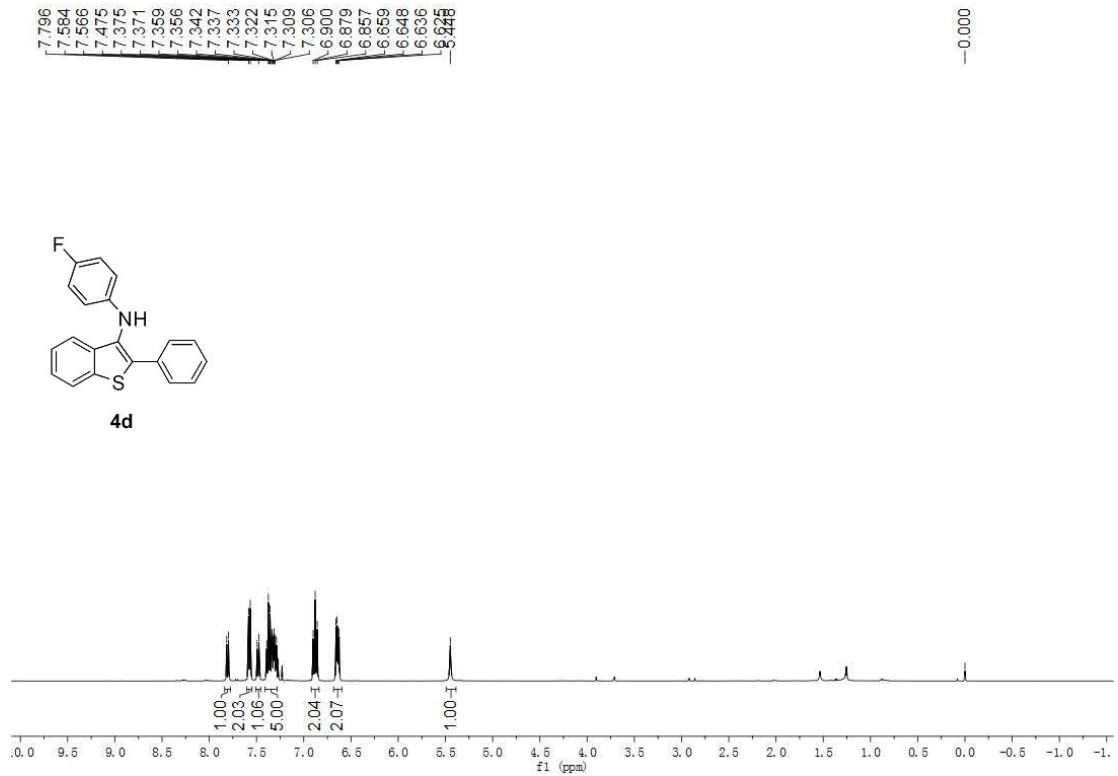

<sup>1</sup>H NMR spectrum of **4d** (400 MHz, CDCl<sub>3</sub>)

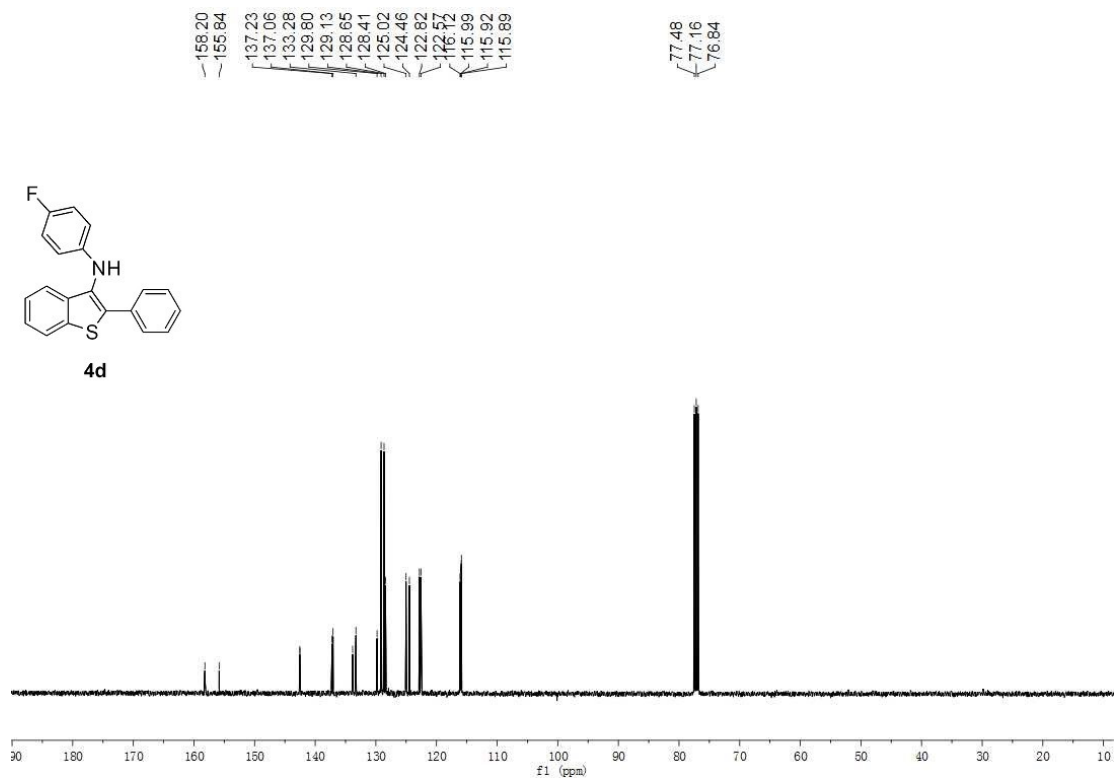

<sup>13</sup>C NMR spectrum of **4d** (100 MHz, CDCl<sub>3</sub>)

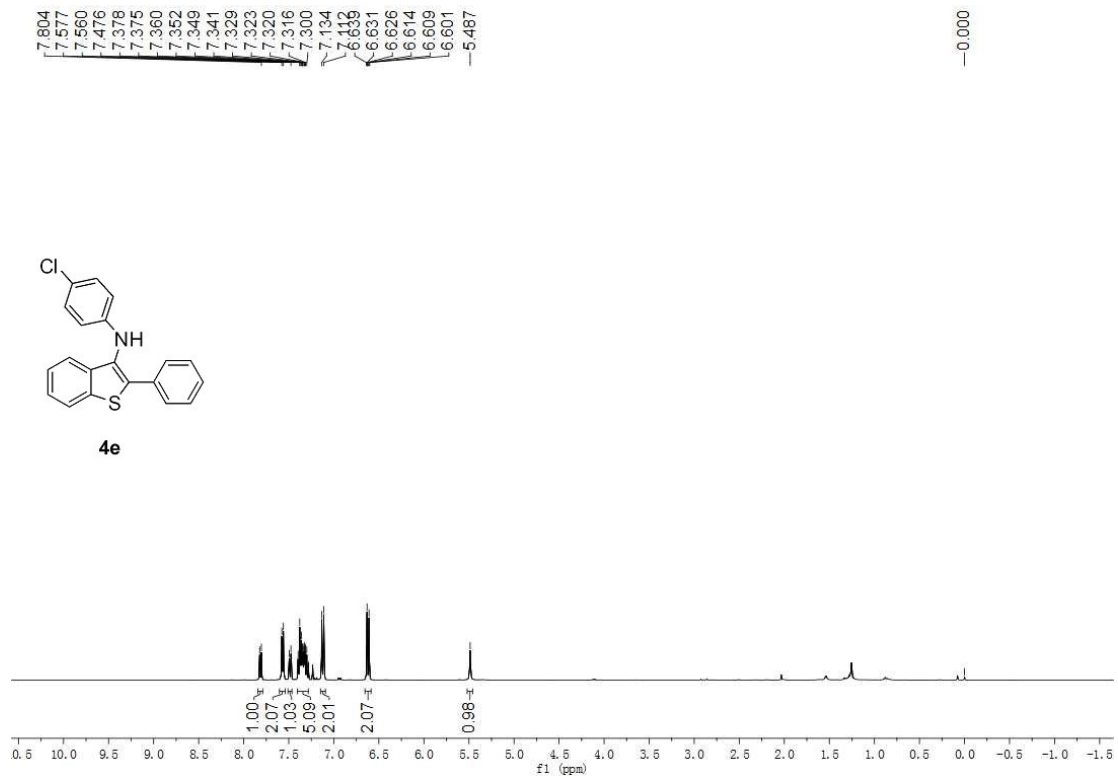

<sup>1</sup>H NMR spectrum of **4e** (400 MHz, CDCl<sub>3</sub>)

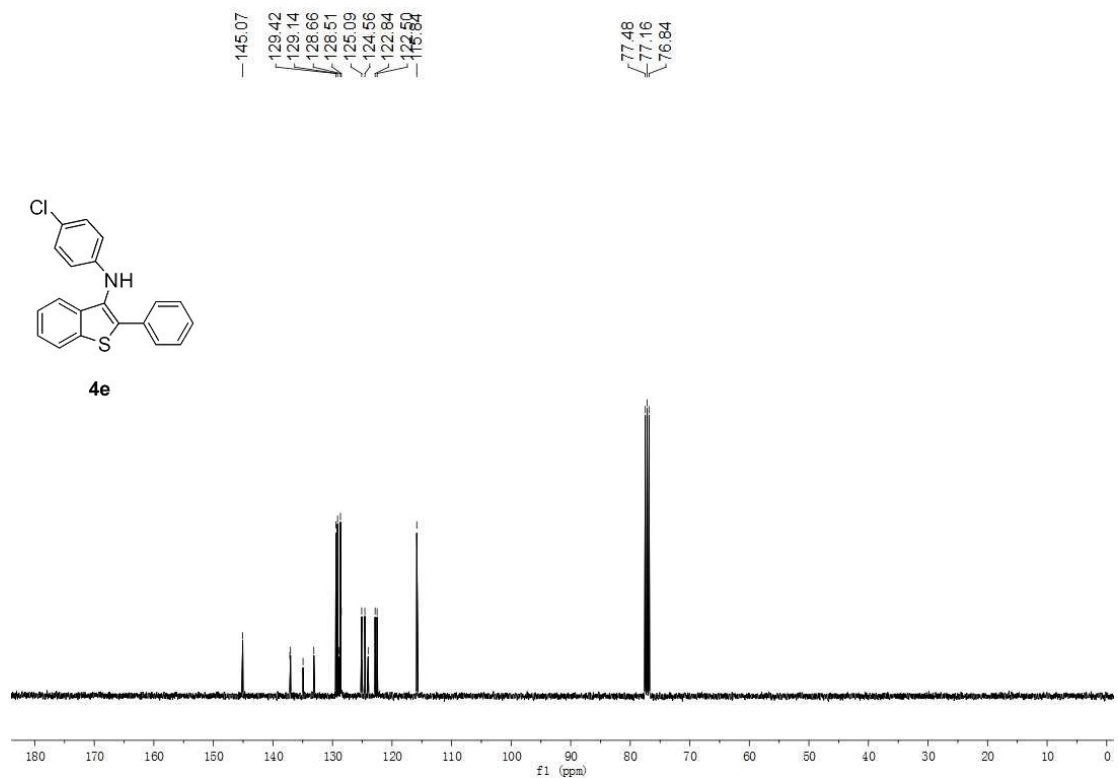

<sup>13</sup>C NMR spectrum of **4e** (100 MHz, CDCl<sub>3</sub>)

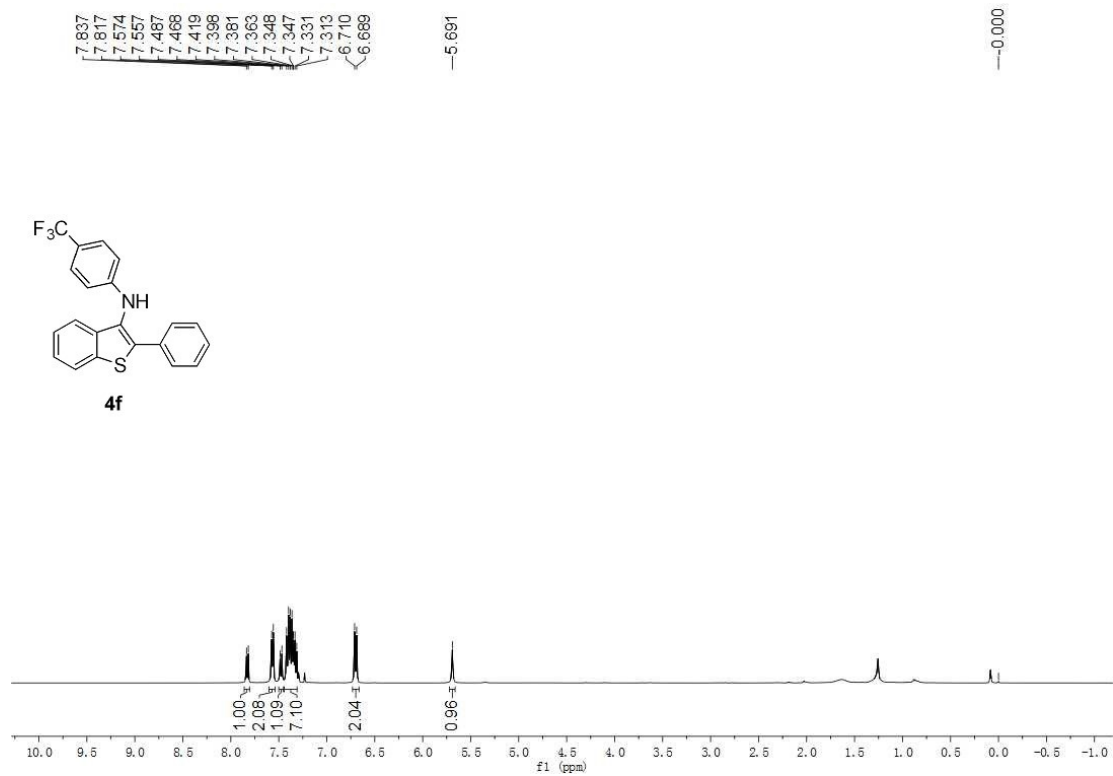

<sup>1</sup>H NMR spectrum of **4f** (400 MHz, CDCl<sub>3</sub>)

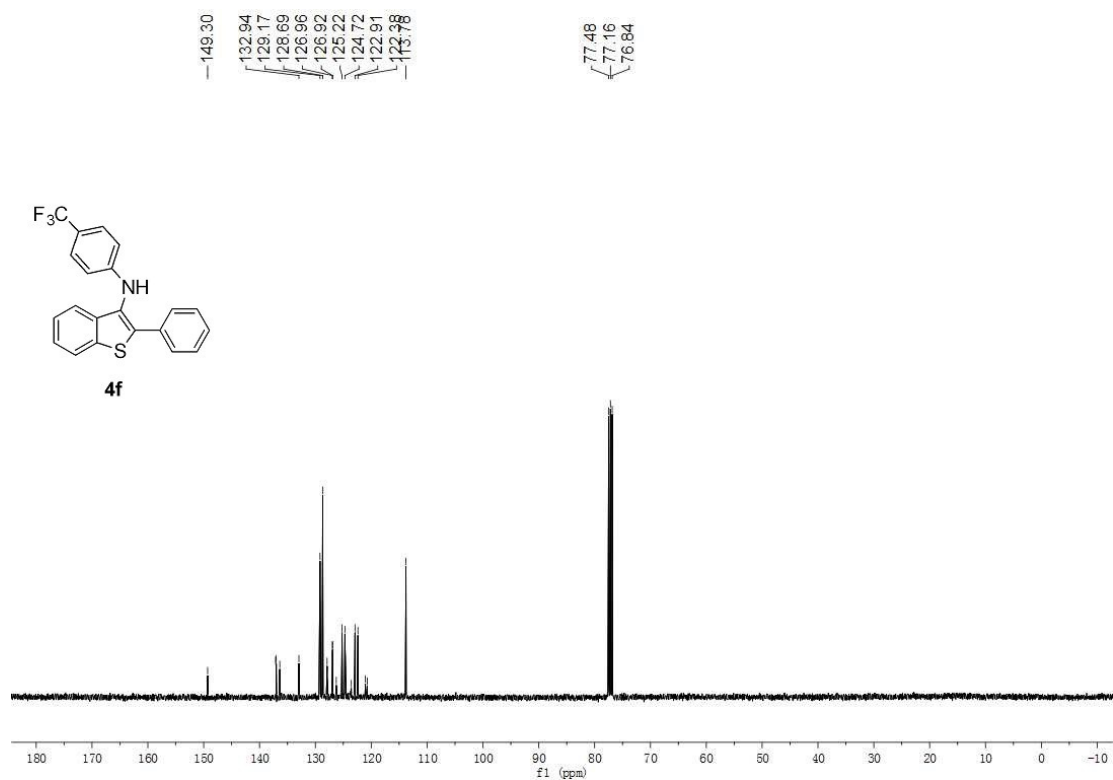

<sup>13</sup>C NMR spectrum of **4f** (100 MHz, CDCl<sub>3</sub>)

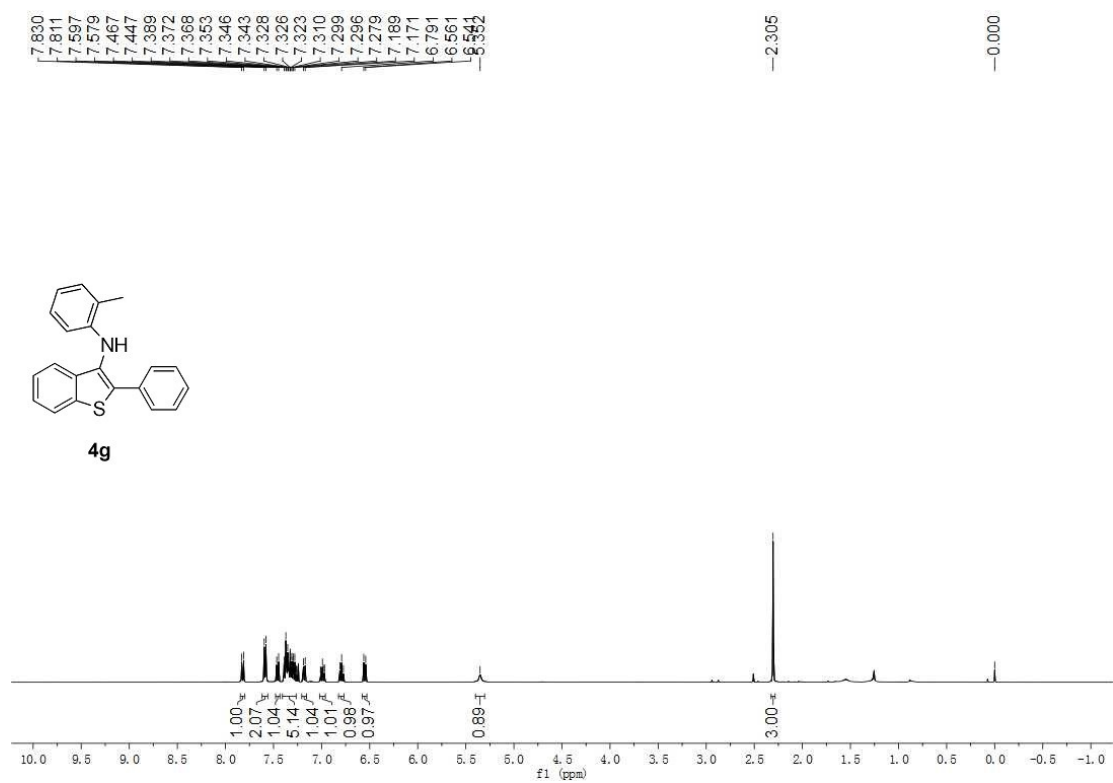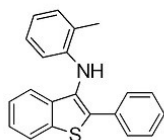

**4g**

<sup>1</sup>H NMR spectrum of **4g** (400 MHz, CDCl<sub>3</sub>)

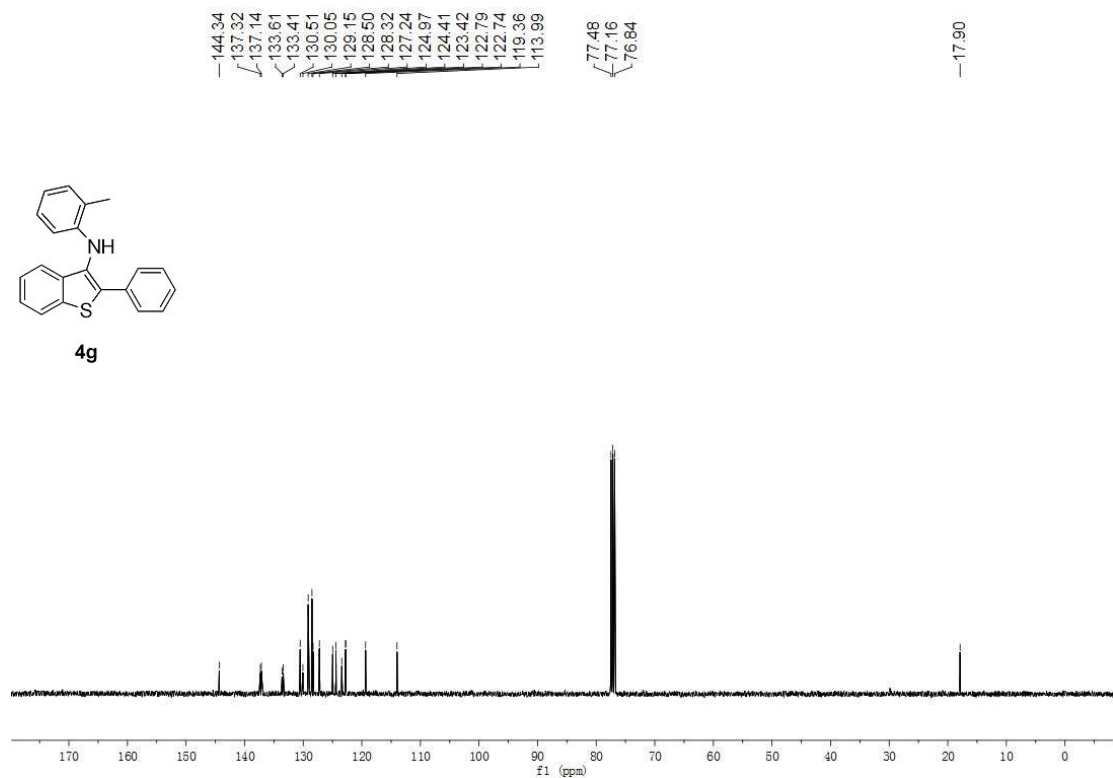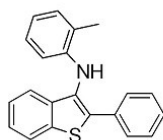

**4g**

<sup>13</sup>C NMR spectrum of **4g** (100 MHz, CDCl<sub>3</sub>)

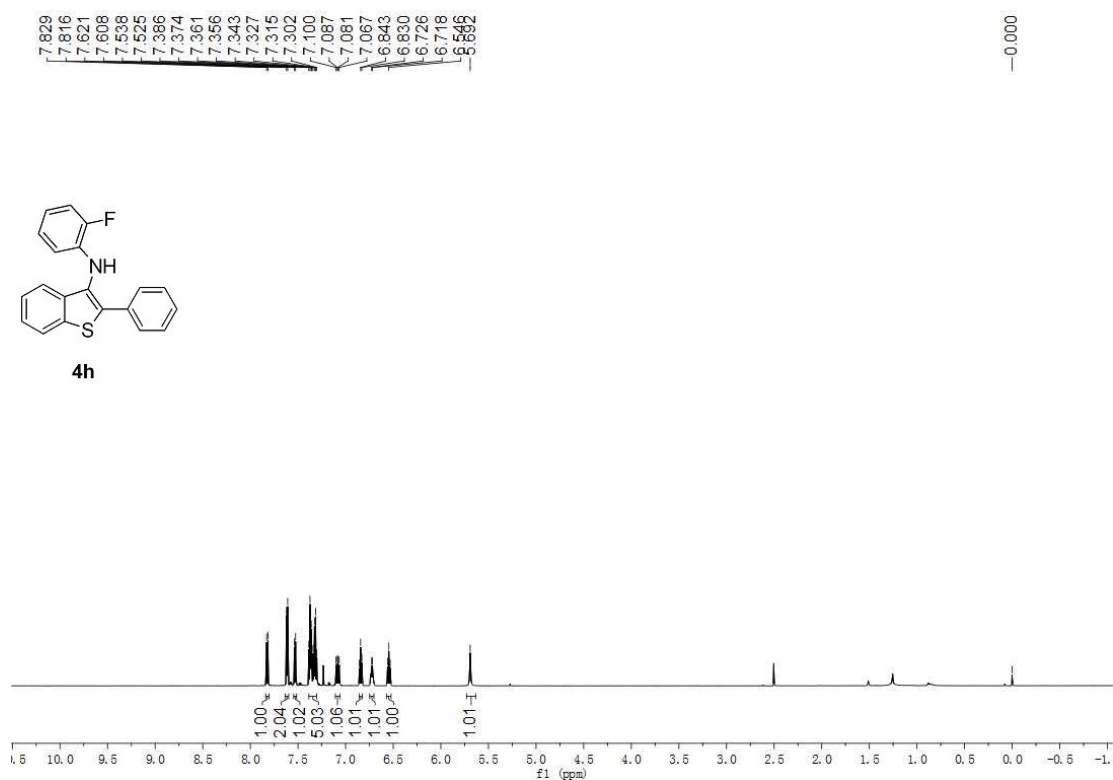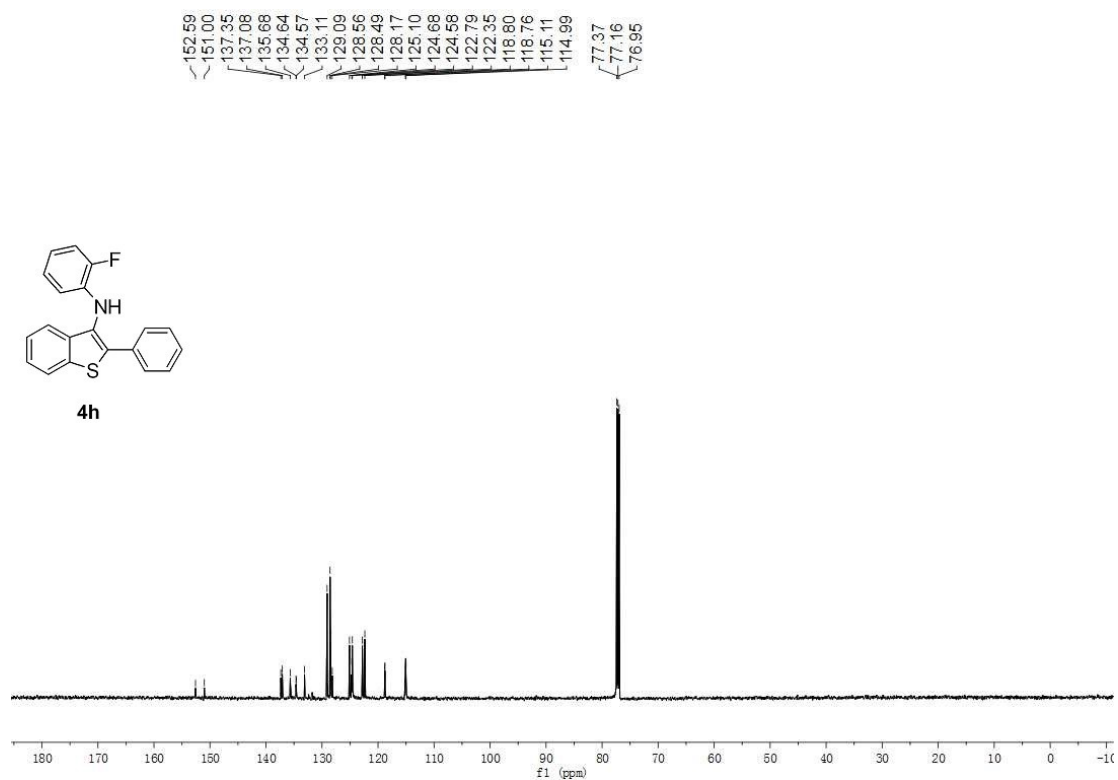

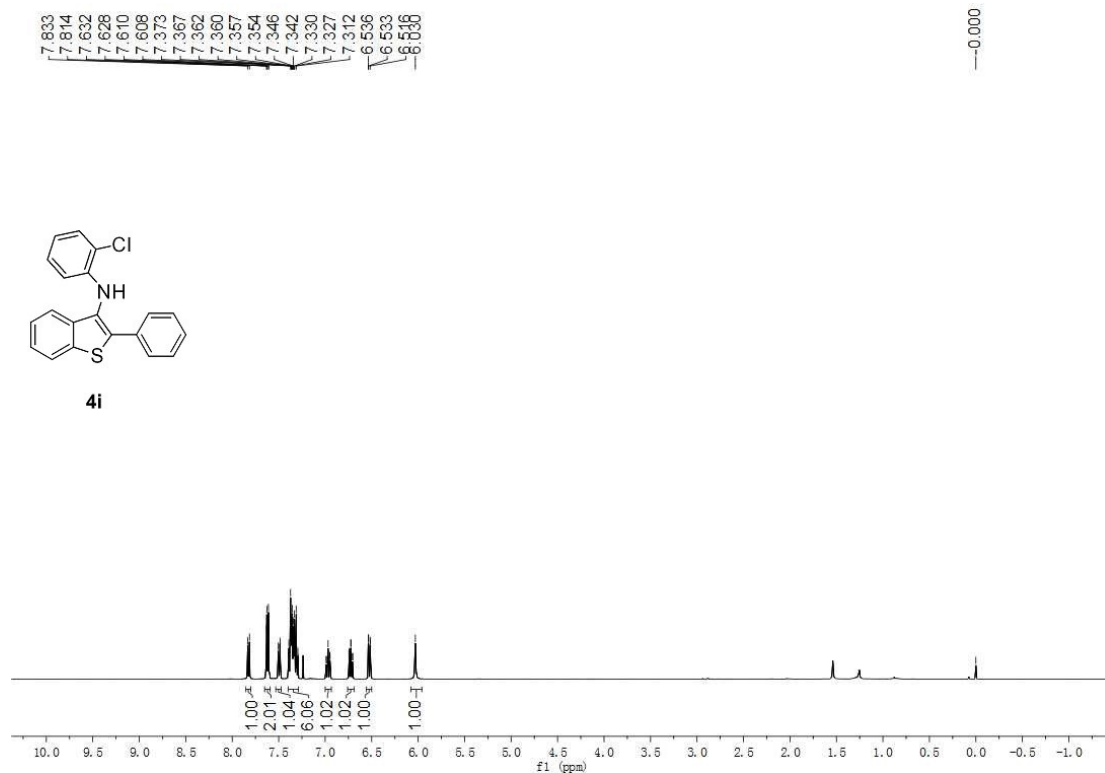

<sup>1</sup>H NMR spectrum of **4i** (400 MHz, CDCl<sub>3</sub>)

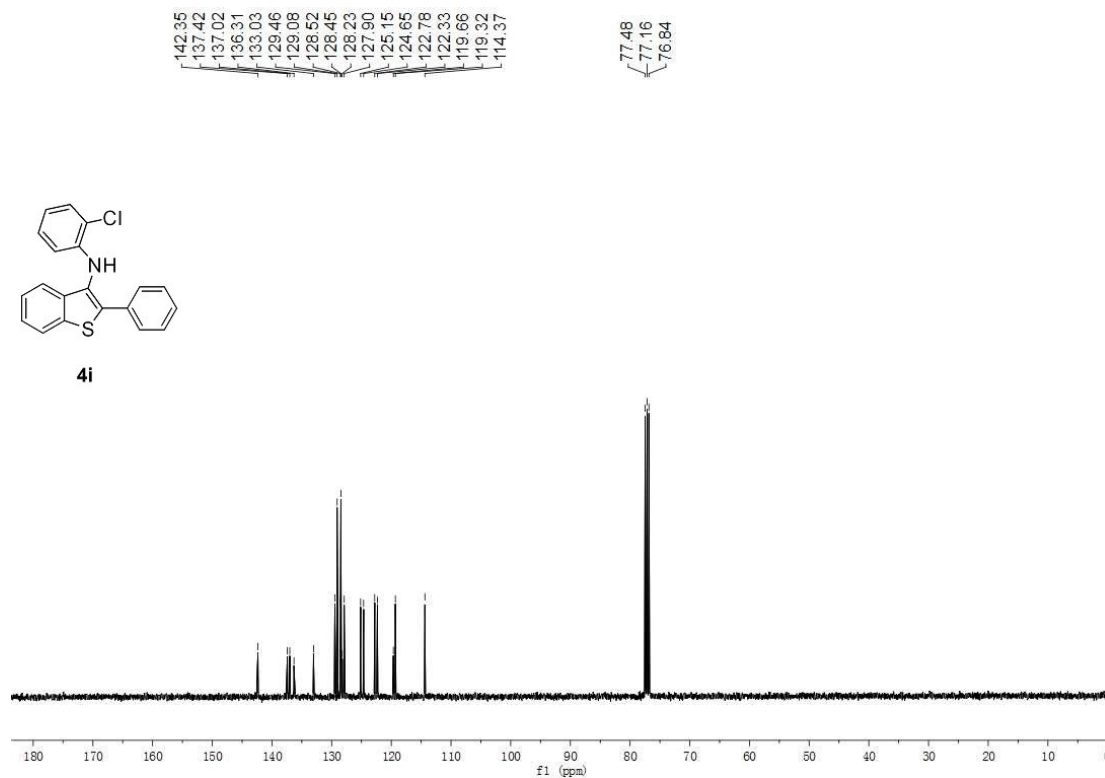

<sup>13</sup>C NMR spectrum of **4i** (100 MHz, CDCl<sub>3</sub>)

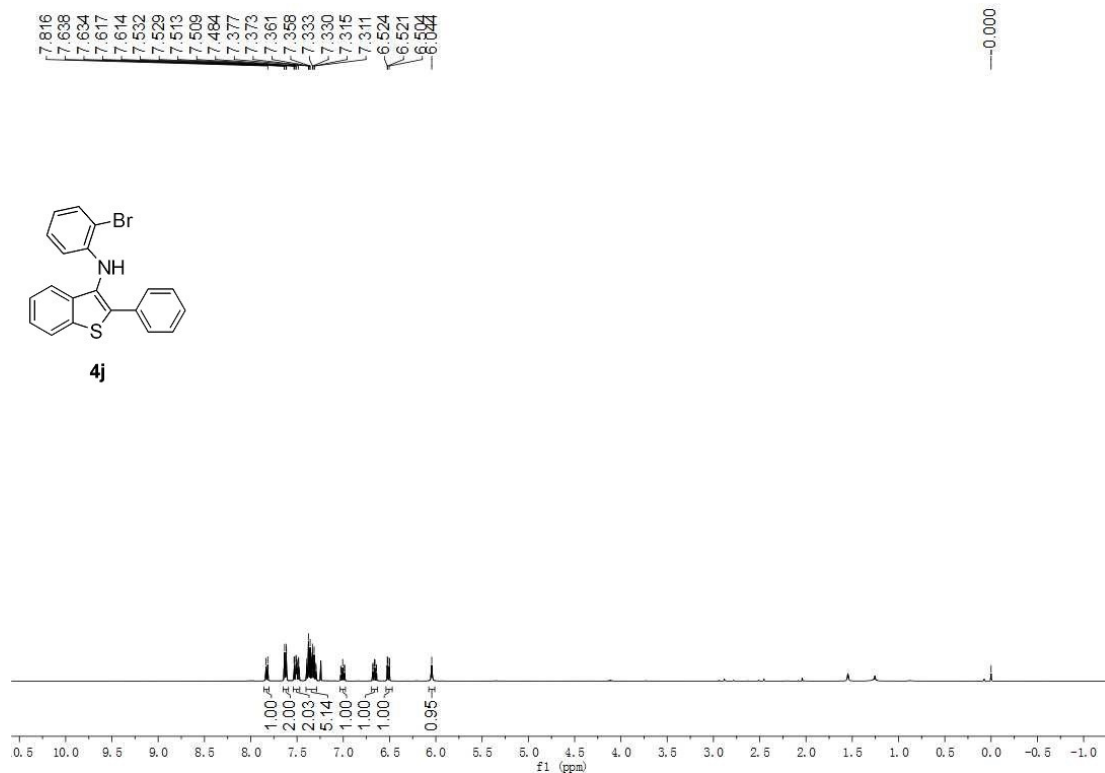

<sup>1</sup>H NMR spectrum of **4j** (400 MHz, CDCl<sub>3</sub>)

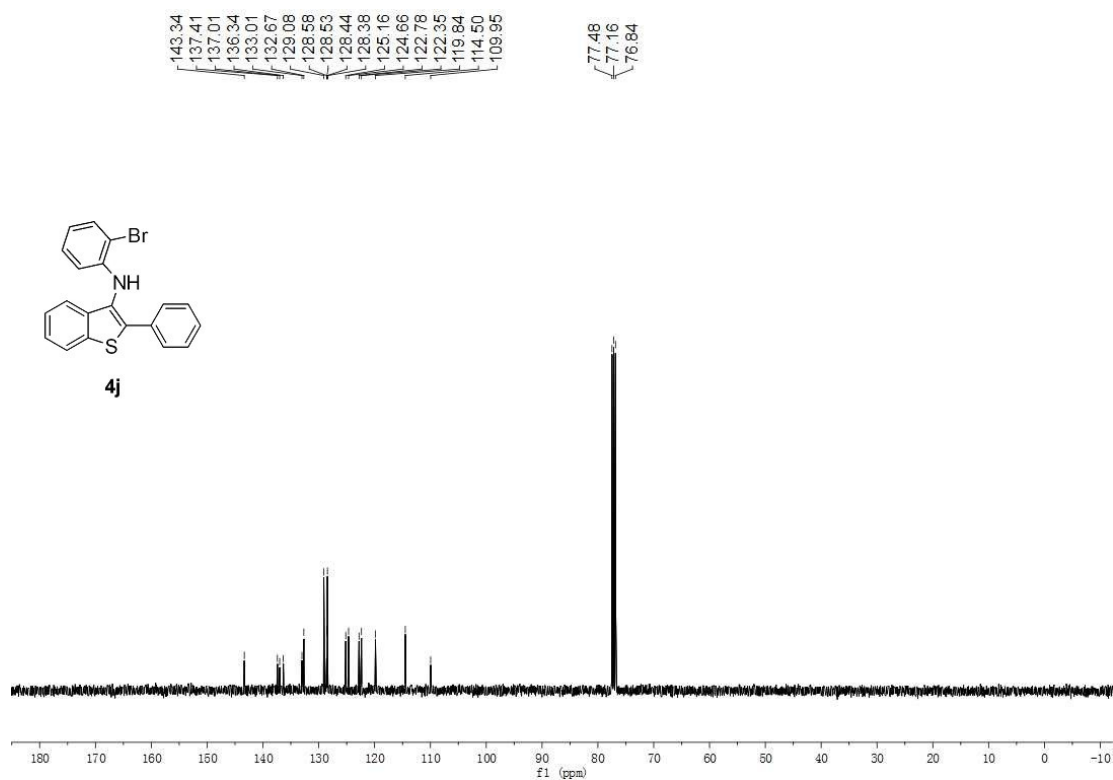

<sup>13</sup>C NMR spectrum of **4j** (100 MHz, CDCl<sub>3</sub>)



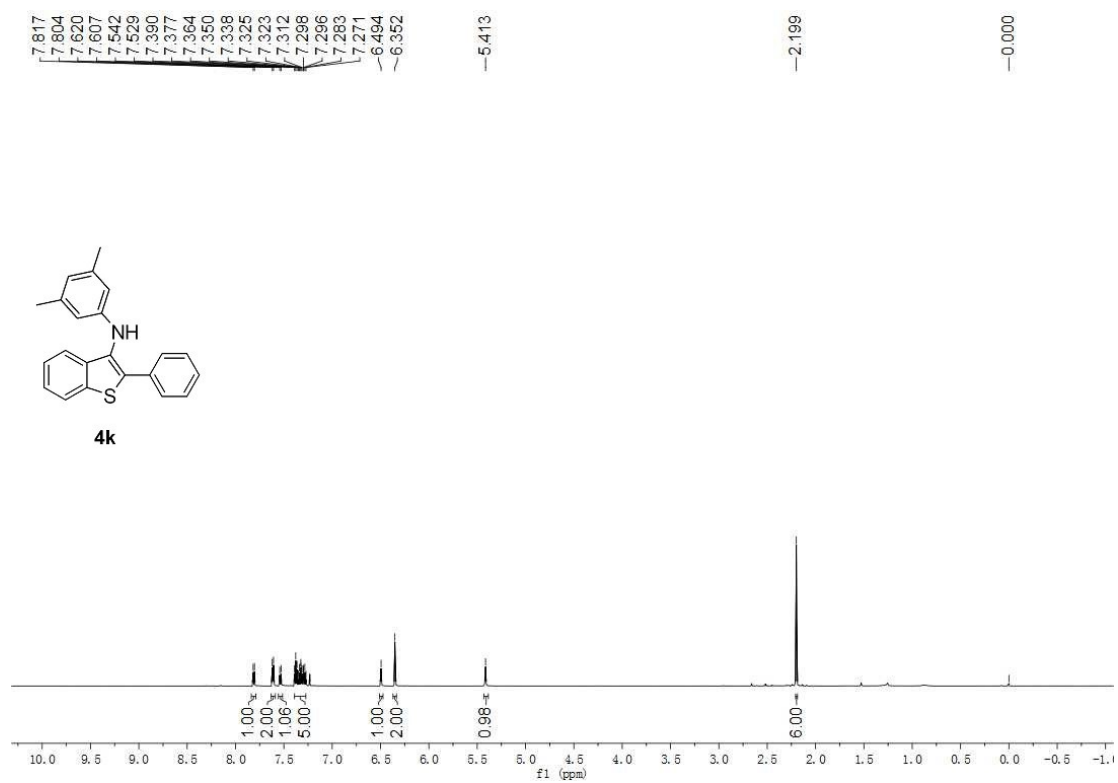

<sup>1</sup>H NMR spectrum of **4k** (600 MHz, CDCl<sub>3</sub>)

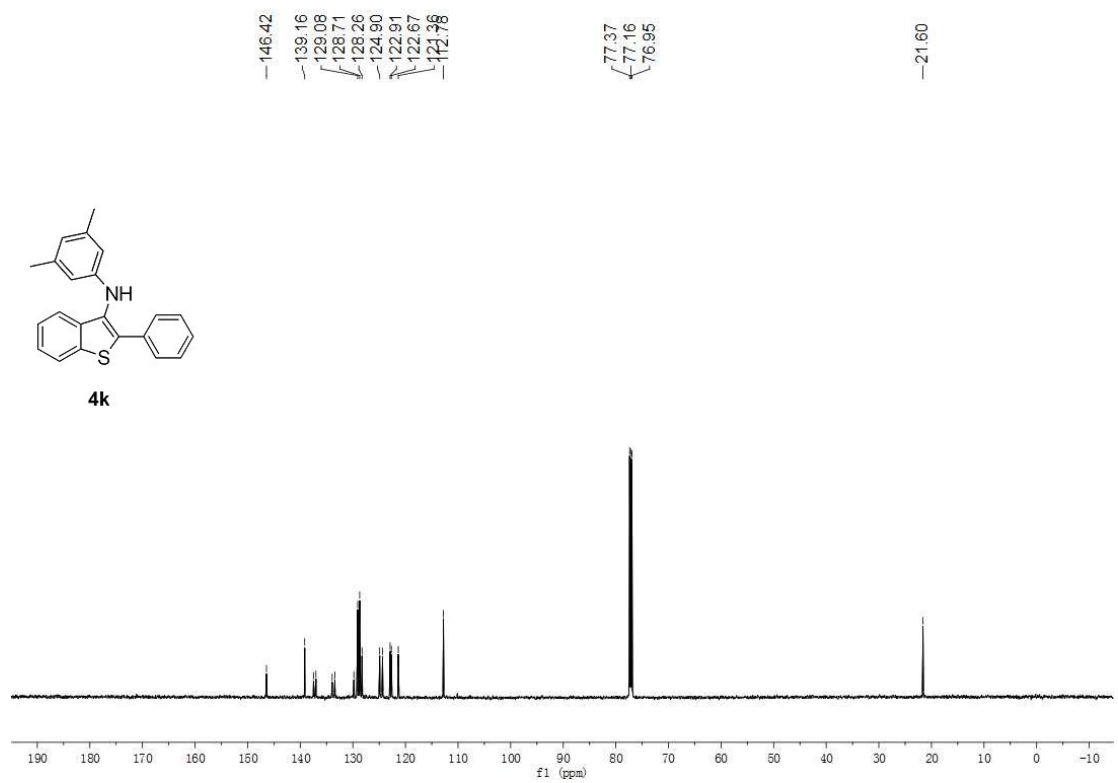

<sup>13</sup>C NMR spectrum of **4k** (150 MHz, CDCl<sub>3</sub>)
